# Supplementary material for: Unconventional secretory processing diversifies neuronal ion channel properties
Source: eLife. 2016 Sep 28;5:e20609. doi: 10.7554/eLife.20609 (PMC5077297; doi:10.7554/eLife.20609)
Supplement: Supplementary file 1. — (A) Core-glycosylated surface proteins (protein groups and protein IDs). (B) Core-glycosylated surface proteins (protein groups cross-referenced with typical LFQ). (C) Core-glycosylated surface proteins (protein IDs, predicted topology, subcellular localization and N-glycosylation sites). (D) Input proteins. Proteins in total hippocampal extracts and/or in A or B groups displayed as in Table 3. (E) KEGG pathways. Top 25 functional classes for all proteins or predicted glycoproteins in core-glycosylated surface proteins versus total proteins. (F) Statistical reporting. Results of the statistical tests used for the indicated figures. DOI: http://dx.doi.org/10.7554/eLife.20609.025 [file elife-20609-supp1.xlsx]

## Sheet: A
Supplementary file 1A. Core-glycosylated surface proteins (protein groups and protein IDs)
#ProteinGroup	# of unique peptides	# of unique protein IDs	Uniq.Genes	PIDs. Group	GeneSymbol. Group
group195	1	4	1	30017417;672052593;672052595;672052597	Abca1
group118	2	1	1	66730294	Abhd12
group225	1	1	1	11990616	Acan
group017	3	2	1	402794619;564364463	Adam10
group091	3	2	1	672018019;672049055	Adam22
group119	1	1	1	62339281	Adam9
group098	1	6	2	157823509;564347895;564347897;672022317;672050432;672060701	Adamts20;Adamts9
group196	1	8	1	255759898;255759900;564334278;564334280;564334282;564334284;672040698;672040701	Add3
group192	1	9	2	158711727;564394440;672084038;672084040;672084042;672084044;672084046;672084048;672084050	Adgrg1;Gpr56
group013	4	1	1	12621148	Adgrl1
group018	2	7	1	694868520;694871014;694874500;694874778;694878102;694879429;694879431	Adgrl2
group043	6	20	2	18677755;672075590;672075592;672075594;672075596;672075598;672075600;672075602;672075604;672075606;672075608;672075610;672075612;672075614;672075616;672075618;672075620;672075622;672075624;672075626	Adgrl3;Lphn3
group129	1	1	1	213511844	Alg2
group148	1	4	1	564343538;564343542;672047581;77735352	Apmap
group008	1	1	1	164519052	Arsa
group033	4	1	1	77993374	Arsb
group203	1	3	2	564323127;564400084;66730376	Arxes2;MGC109340
group178	3	1	1	40254747	Asah1
group057	5	3	1	282158057;672074417;672074419	Astn1
group116	1	1	1	405113055	Astn2
group190	1	1	1	6978545	Atp1a2
group173	1	2	1	672034924;6978547	Atp1a3
group046	2	3	1	564372502;564372504;56799390	Atp1b2
group107	2	10	1	158138481;672088934;672088936;672088938;672088940;672088942;672088944;672088946;672088948;672088950	Atp2b3
group089	3	1	1	13929110	Atp6ap1
group187	2	8	1	564383677;564383679;564383681;564383683;564383689;672027926;672076238;672076245	Atp8a1
group155	1	2	1	564299497;672040941	Atrnl1
group067	1	2	1	672026568;672072366	B3galtl
group087	2	5	1	564337070;564337073;564337075;75992946;75992948	Bcan
group170	1	2	1	27465571;564380987	Brinp3
group163	1	4	1	197385182;564375117;564375119;672069788	Btbd17
group061	9	5	1	28212250;564365394;564365396;564365398;564365400	Cacna2d2
group122	2	2	1	564383955;6978629	Cd38
group080	1	9	1	19923703;564342033;564342037;564342041;672046382;672046384;672046387;672046389;672046392	Cd44
group095	1	8	1	564376633;564376636;564376638;564376640;564376643;564376645;564376647;9506469	Cd47
group164	1	2	1	281427192;564394398	Cdh11
group174	1	1	1	157819501	Clptm1
group152	1	2	1	157817931;564324974	Clptm1l
group159	1	2	1	46048420;564386466	Clu
group010	4	3	1	16923964;564361428;672059772	Cntn1
group085	3	3	1	564380454;672073642;6981632	Cntn2
group092	3	1	1	157818225	Cntnap4
group040	3	1	1	6978699	Cpd
group127	2	1	1	6978701	Cpe
group171	1	1	1	42476045	Ctsd
group050	7	3	1	672083258;672083260;6978755	Dcc
group207	2	2	1	299829287;564342364	Disp2
group137	1	1	1	62543491	Dnajb11
group188	1	1	1	157822779	Dnajc11
group090	3	4	2	12408298;564345250;58865978;672073811	Dpp10;Dpp6
group103	1	1	1	157822543	Dscaml1
group223	1	3	1	25742617;672077143;672077145	Egfr
group044	5	4	1	157786876;564378373;564378377;672071938	Elfn1
group161	2	2	1	672022247;672060362	Elfn2
group139	3	1	1	16758534	Emb
group084	7	2	1	157822661;564353698	Emc1
group121	1	3	1	25282445;564339627;672044723	Entpd2
group073	4	9	6	11067415;300798289;403224991;564321746;564326930;564356552;672069435;672085451;77020289	Erbb2;Erbb4;LOC102552659;Map3k10;Map3k9;RGD1306091
group094	3	2	1	392331685;672067122	Ergic1
group141	1	3	1	157823984;672080405;672080407	Erlin2
group012	2	2	1	42491372;564333337	Ermp1
group037	10	3	2	19924061;564392540;672082457	Ero1a;Ero1lb
group086	1	1	1	52138595	F3
group020	8	9	2	392351637;564313986;564320180;564320182;564320184;564374603;564374605;672030283;672082668	Fam171a1;Fam171a2
group191	1	2	2	157821545;672051433	Fam234b;RGD1306151
group209	1	1	1	56090566	Fkbp9
group105	3	1	1	17105334	Folh1
group056	1	1	1	158186726	Fuca1
group069	2	1	1	51948408	Fuca2
group088	2	5	2	209413778;34328532;564371390;564371392;564383581	Gabra1;Gabra2
group169	2	3	1	564371404;672067140;6978869	Gabrb2
group179	1	1	1	8393390	Gabrb3
group177	2	2	1	34328527;564371394	Gabrg2
group106	4	1	1	114145565	Galns
group101	6	3	1	157822919;564332724;564332726	Ganab
group053	2	2	2	13994184;672050277	Gcs1;LOC103692171
group024	1	1	1	47575864	Gde1
group081	2	3	1	208973252;672047395;672047397	Ggt7
group189	1	2	1	54400718;564388312	Ghitm
group184	1	2	1	564398071;6978896	Gja1
group132	1	1	1	348605144	Gla
group011	1	1	1	157824103	Glb1
group221	1	1	1	51948452	Gpaa1
group206	1	2	1	46485440;Q3ZBD7	Gpi
group039	6	1	1	29789269	Gria1
group113	4	2	1	139394534;8393475	Gria2
group210	1	3	1	163792203;163792205;672088527	Gria3
group109	2	1	1	13259380	Grid1
group062	4	6	2	163659909;163659911;564376065;564376067;8393481;9506755	Grik1;Grik2
group194	1	3	1	163659913;163659915;564352814	Grik3
group175	1	2	1	396578157;396578159	Grin1
group049	5	1	1	140971205	Grin2a
group162	3	1	1	6980984	Grin2b
group063	1	2	1	564329595;8393490	Grm5
group202	1	3	1	157821675;564354237;564354239	H6pd
group065	1	2	1	392349939;672022705	Hepacam
group023	2	2	1	52138739;564363946	Hexa
group006	6	1	1	58865470	Hexb
group058	1	2	1	564343665;672047474	Hm13
group156	1	2	1	564343663;672047474	Hm13
group128	2	1	1	25742834	Hs3st1
group135	2	1	1	210032365	Hsp90b1
group130	8	1	1	148747550	Hspa13
group182	1	5	1	564363268;564363270;672061591;77404375;77404380	Hyou1
group047	2	1	1	6981068	Icam1
group003	1	1	1	285026497	Icam5
group120	2	4	1	564381813;564381817;564381819;62339335	Igsf8
group115	1	2	1	268607708;564377259	Il1rap
group093	1	11	1	672049933;672049935;672049937;672049939;672049941;672049943;672049945;672049947;672049949;672049951;77917546	Immt
group032	3	2	1	387157899;564341337	Itga6
group123	1	3	1	564357861;57528941;672057559	Itga7
group014	9	2	1	564302444;672046176	Itgav
group145	1	1	1	158517933	Itgb5
group146	2	2	1	157817947;564357619	Itgb8
group112	1	4	1	672088982;672088984;672088986;8393820	L1cam
group068	1	1	1	31543514	Lgmn
group102	2	5	1	213688408;564363844;564363846;672062026;672062029	Lingo1
group151	3	1	1	157817446	Lingo2
group144	1	1	1	51036677	Lmbrd1
group147	1	1	1	121583776	Lmf2
group219	1	36	21	113865837;197927431;261862309;47777291;564324069;564324270;564396450;564396598;564396600;564396658;564397024;57012342;57012384;57012390;57012402;57012416;57012420;57012424;57012426;57114336;672033463;672033703;672033708;672033710;672085757;672085761;672085765;672085767;672085769;672085771;672085904;6981492;6981494;77404170;77404172;77404174	LOC100365176;LOC102546968;LOC102557454;LOC683761;RT1-A;RT1-A1;RT1-A2;RT1-CE10;RT1-CE13;RT1-CE14;RT1-CE16;RT1-CE2;RT1-CE5;RT1-Cl;RT1-EC2;RT1-N1;RT1-N2;RT1-N3;RT1-T24-3;RT1-T24-4;Rt1.aa
group114	3	6	2	392355834;56090485;564399895;564399897;672050874;672050876	LOC100909548;M6pr
group110	1	5	4	32189350;32189355;392338713;392345613;672089498	LOC100909799;Slc25a31;Slc25a4;Slc25a5
group028	4	1	1	325197225	Lppr4
group036	1	7	1	157817516;189163475;564327036;564327040;672035803;672035806;672035809	Lrfn1
group150	2	2	1	161760638;564367102	Lrfn2
group160	1	2	1	157819369;564327378	Lrfn3
group108	4	2	1	157820049;672056213	Lrfn5
group167	1	2	1	283837871;672058769	Lrp1
group007	1	2	1	77176452;77176454	Mcam
group181	1	1	1	157822793	Mcu
group149	2	2	1	40538872;672056216	Mdga2
group131	2	2	1	6981200;93277126	Mfge8
group224	1	1	1	11559935	Myo5a
group030	5	3	1	564361198;564361200;58865810	Naga
group052	3	1	1	42821116	Ncam2
group074	4	1	1	189011606	Nceh1
group060	1	1	1	11067409	Negr1
group041	8	2	1	672022994;672062665	Neo1
group005	3	23	1	19924211;237858623;237858625;237858627;564380416;564380430;564380438;564380444;564380446;672073585;672073587;672073590;672073592;672073594;672073596;672073598;672073600;672073603;672073605;672073607;672073609;672073611;672073614	Nfasc
group022	9	2	1	157816949;564328178	Nomo1
group140	1	2	1	672062216;9507073	Nptn
group211	1	1	1	24308510	Nptx1
group126	2	1	1	36054040	Nptxr
group042	2	1	1	37620151	Nrxn1
group048	2	4	1	168823431;672056413;672056415;672056417	Nrxn3
group143	1	5	1	564390166;672080847;672080849;672080852;6981294	Ntrk2
group015	1	3	1	397174820;397174822;9506939	Ntrk3
group035	1	2	1	16758020;564347908	Nup210
group200	1	1	1	21955259	Olfm3
group066	1	1	1	226874871	Omg
group059	2	3	1	51036657;564397873;564397875	P4ha1
group083	1	2	1	564310639;564365719	P4htm
group076	7	5	1	157822363;564387229;564387231;564387233;564387237	Pcdh17
group168	1	2	1	51854233;564383807	Pcdh7
group078	2	1	1	6981342	Pcsk2
group077	8	1	1	21489987	Pcyox1
group034	4	2	1	197384556;564393676	Pcyox1l
group186	2	1	1	42538976	Pgap1
group029	6	1	1	54633340	Pigs
group218	1	2	1	164663843;564344291	Pigt
group157	1	1	1	400153797	Plod1
group075	9	8	3	164518900;310688889;392347490;564304046;564329408;564329410;672088848;672088850	Plxna1;Plxna2;Plxna3
group104	2	2	1	672018245;672049453	Plxna4a
group070	3	2	1	564308472;672058561	Plxnc1
group004	3	2	1	164518932;564397476	Pofut2
group027	4	1	1	281332155	Poglut1
group071	5	4	1	57222294;672063612;672063614;672063616	Pomgnt2
group099	2	2	1	61556888;672048833	Pon2
group016	2	1	1	166064014	Prcp
group215	1	1	1	9507007	Ptgfrn
group205	1	1	1	564352390	Ptprf
group055	2	1	1	29789369	Ptprg
group201	1	1	1	274323760	Ptprm
group197	2	5	1	283046647;283046651;564345936;564345938;564345940	Ptprz1
group009	1	1	1	61889071	Rab10
group136	1	3	1	16758368;564340557;564340559	Rab14
group064	2	2	1	19424194;672041398	Rab3c
group183	1	2	1	31543579;564345236	Reln
group216	1	3	1	157822809;564350865;672052313	RGD1309821
group193	3	5	1	11559953;672070410;672070412;672070414;672070416	Robo1
group111	2	4	1	281332151;672070418;672070420;672070422	Robo2
group227	1	3	1	162287391;564379463;564379465	Rpl6
group125	4	1	1	752993193	Rpn1
group031	2	1	1	158749626	Scamp1
group213	1	1	1	13928730	Scarb1
group138	2	3	1	402534527;402534531;8394245	Scn1b
group021	2	12	4	18959222;564374804;672045844;672045846;672045848;672045850;672045852;672045854;672045856;6981506;6981510;6981512	Scn2a;Scn3a;Scn4a;Scn9a
group054	2	1	1	19173736	Scpep1
group001	7	1	1	158341666	Sel1l
group025	3	5	1	403224995;564337164;564337166;564337168;672042946	Sema4a
group045	2	1	1	281427160	Sema4b
group051	3	1	1	281604106	Sema4d
group153	1	1	1	9507083	Sema4f
group158	1	3	1	16758220;564366913;564366915	Sema6b
group133	1	2	1	209863068;672062037	Sema7a
group165	3	1	1	8393057	Serpinh1
group220	1	1	1	157817061	Siae
group079	5	4	2	157820121;19705463;564342248;564342250	Slc12a5;Slc12a6
group038	1	2	1	13929106;564344048	Slc32a1
group212	1	2	1	402743472;402743833	Slc3a2
group176	1	5	1	16758164;564383189;564383191;564383193;564383195	Slc4a4
group134	1	3	1	157818529;564336816;672042681	Slitrk3
group217	1	13	1	300797077;564334049;564334051;564334053;564334055;564334057;564334059;564334061;672014998;672015000;672015002;672040484;672040486	Sorcs1
group198	1	2	1	170014691;672076678	Sorcs2
group117	2	4	1	209954677;564338480;564338482;564338484	Sort1
group002	2	1	1	25453372	Spon1
group226	2	1	1	6981540	St8sia3
group097	3	2	1	197927176;564363049	Stt3a
group172	1	1	1	281485606	Stt3b
group180	1	4	1	110626131;564344417;564344419;672048121	Sulf2
group214	1	3	1	672073281;672073283;72534840	Svop
group185	2	1	1	209870039	Synj1
group166	2	4	2	300798434;672032816;672037836;672088585	Tenm1;Tenm4
group100	2	1	1	9910320	Tenm2
group154	1	4	1	281306744;564389094;672080113;672080115	Tenm3
group142	5	3	1	281306746;564377124;564377126	Tfrc
group208	2	1	1	6981654	Thy1
group199	1	1	1	51948502	Tmem106b
group222	1	1	1	305632805	Tmem178b
group026	3	3	2	122891854;51948472;564364634	Tmem30a;Tmem30b
group082	2	3	1	293343193;564321018;564394339	Tmx3
group204	1	2	1	157820133;672071990	Ttyh3
group096	1	2	1	672081146;68163437	Txndc15
group019	2	3	1	19424302;564367910;564367912	Uggt1
group072	4	2	1	672072636;68341983	Wbscr17
group124	1	2	1	13027430;672083557	Wdr7

## Sheet: B
Supplementary file 1B. Core-glycosylated surface proteins (protein groups cross-referenced with typical LFQ).
#ProteinGroup	TrueInPeptideAnalysis	# of unique peptides	# of unique protein IDs	Uniq.Genes	PIDs.Group	GeneSymbol.Group
group206	1	12	4	1	672052595;672052593;30017417;672052597	Abca1
group194	1	9	1	1	66730294	Abhd12
group007	1	4	1	1	11990616	Acan
group138	1	3	2	1	564364463;402794619	Adam10
group195	1	7	2	1	672049055;672018019	Adam22
group192	1	1	1	1	62339281	Adam9
group198	1	2	6	2	672022317;672060701;564347897;157823509;672050432;564347895	Adamts20;Adamts9
group093	1	2	8	1	672040701;255759898;672040698;564334284;564334282;564334280;564334278;255759900	Add3
group046	1	5	10	3	672084050;672084048;672084046;672084044;672084042;564394440;158711727;672084040;672084038;672032965	Adgrg1;Gpr56;LOC103690329
group010	1	19	1	1	12621148	Adgrl1
group219	1	7	7	1	694879429;694878102;694868520;694874778;694871014;694874500;694879431	Adgrl2
group066	1	27	20	2	672075622;672075620;672075618;672075616;672075614;672075606;672075604;672075602;18677755;672075600;672075596;672075594;672075592;672075590;672075610;672075598;672075626;672075624;672075612;672075608	Adgrl3;Lphn3
group084	0	3	1	1	213511844	Alg2
group170	1	2	4	1	77735352;672047581;564343538;564343542	Apmap
group055	1	5	1	1	164519052	Arsa
group232	1	8	1	1	77993374	Arsb
group165	1	1	3	2	66730376;564400084;564323127	Arxes2;MGC109340
group136	1	12	1	1	40254747	Asah1
group106	1	21	3	1	282158057;672074419;672074417	Astn1
group140	1	4	1	1	405113055	Astn2
group220	1	14	3	2	6978545;675294849;675294847	Atp12a;Atp1a2
group202	0	25	4	2	6978547;672034924;402478613;12408294	Atp1a3;Atp1a4
group186	1	10	3	1	56799390;564372504;564372502	Atp1b2
group042	1	12	10	1	672088948;672088946;158138481;672088944;672088942;672088940;672088938;672088936;672088950;672088934	Atp2b3
group015	1	7	1	1	13929110	Atp6ap1
group183	1	10	8	1	672027926;564383683;564383681;564383679;564383677;672076238;672076245;564383689	Atp8a1
group161	1	3	2	1	672040941;564299497	Atrnl1
group200	1	2	2	1	672026568;672072366	B3galtl
group168	1	5	6	2	75992948;564337075;564337073;564337070;75992946;672042833	Bcan;LOC100910284
group098	1	3	2	1	564380987;27465571	Brinp3
group074	1	1	4	1	564375119;564375117;672069788;197385182	Btbd17
group176	1	24	5	1	564365400;564365398;564365396;564365394;28212250	Cacna2d2
group184	1	4	2	1	564383955;6978629	Cd38
group076	1	3	9	1	564342041;672046389;672046387;564342037;672046384;672046382;564342033;672046392;19923703	Cd44
group178	0	7	8	1	564376643;9506469;564376645;564376633;564376647;564376640;564376638;564376636	Cd47
group103	1	16	2	1	564394398;281427192	Cdh11
group029	1	5	1	1	157819501	Clptm1
group024	1	3	2	1	564324974;157817931	Clptm1l
group146	0	4	2	1	564386466;46048420	Clu
group063	0	50	3	1	564361428;16923964;672059772	Cntn1
group180	1	22	3	1	564380454;672073642;6981632	Cntn2
group026	1	14	1	1	157818225	Cntnap4
group221	1	16	1	1	6978699	Cpd
group222	1	7	1	1	6978701	Cpe
group142	1	9	1	1	42476045	Ctsd
group215	0	25	1	1	672083258	Dcc
group216	1	25	2	1	672083260;6978755	Dcc
group113	1	3	2	1	564342364;299829287	Disp2
group193	1	5	1	1	62543491	Dnajb11
group037	1	1	1	1	157822779	Dnajc11
group189	1	13	2	1	58865978;672073811	Dpp10
group009	1	33	1	1	12408298	Dpp6
group171	1	33	1	1	564345250	Dpp6
group035	0	3	1	1	157822543	Dscaml1
group094	1	8	4	1	25742617;672077145;672077143;672077147	Egfr
group020	1	8	4	1	672071938;564378377;564378373;157786876	Elfn1
group197	1	9	2	1	672022247;672060362	Elfn2
group061	1	8	1	1	16758534	Emb
group036	1	24	2	1	157822661;564353698	Emc1
group188	1	22	7	3	58865470;564372542;564372540;564354207;158186651;158186649;126723393	Eno1;Eno3;Hexb
group091	1	5	3	1	672044723;25282445;564339627	Entpd2
group004	1	15	9	6	11067415;672069435;77020289;564321746;564326930;300798289;672085451;403224991;564356552	Erbb2;Erbb4;LOC102552659;Map3k10;Map3k9;RGD1306091
group128	1	4	2	1	392331685;672067122	Ergic1
group040	1	7	3	1	672080407;672080405;157823984	Erlin2
group143	1	11	2	1	42491372;564333337	Ermp1
group077	1	12	3	2	19924061;672082457;564392540	Ero1a;Ero1lb
group156	1	2	1	1	52138595	F3
group164	1	4	5	1	672030283;564320184;564320182;564320180;672082668	Fam171a1
group131	1	12	4	1	564313986;564374603;392351637;564374605	Fam171a2
group032	1	5	4	2	157821545;672051433;564349386;672051431	Fam234b;RGD1306151
group160	0	2	1	1	56090566	Fkbp9
group065	1	18	1	1	17105334	Folh1
group043	1	7	1	1	158186726	Fuca1
group152	1	2	1	1	51948408	Fuca2
group124	1	4	3	1	564371392;564371390;34328532	Gabra1
group079	1	5	2	1	564383581;209413778	Gabra2
group177	1	6	3	1	6978869;564371404;672067140	Gabrb2
group234	1	8	1	1	8393390	Gabrb3
group123	1	7	3	2	34328527;564371394;18034793	Gabrg1;Gabrg2
group005	1	6	1	1	114145565	Galns
group218	1	11	5	2	68341983;672072636;672073342;672073340;169790950	Galnt9;Wbscr17
group167	1	26	3	1	564332726;564332724;157822919	Ganab
group017	1	8	2	2	672050277;13994184	Gcs1;LOC103692171
group147	1	4	1	1	47575864	Gde1
group078	1	13	3	1	208973252;672047395;672047397	Ggt7
group158	1	1	2	1	564388312;54400718	Ghitm
group185	1	6	2	1	6978896;564398071	Gja1
group125	1	12	1	1	348605144	Gla
group041	1	9	1	1	157824103	Glb1
group153	1	2	1	1	51948452	Gpaa1
group001	1	1	2	2	Q3ZBD7;46485440	Gpi;unknown
group111	1	26	1	1	29789269	Gria1
group016	1	29	1	1	139394534	Gria2
group235	0	29	1	1	8393475	Gria2
group051	1	17	2	1	163792203;672088527	Gria3
group052	0	17	1	1	163792205	Gria3
group012	1	12	2	2	13259380;564388266	Grid1;LOC103690098
group236	1	11	6	2	9506755;163659909;564376067;8393481;564376065;163659911	Grik1;Grik2
group050	1	3	3	1	564352814;163659913;163659915	Grik3
group133	1	24	2	1	396578159;396578157	Grin1
group018	1	15	1	1	140971205	Grin2a
group223	1	31	1	1	6980984	Grin2b
group166	1	5	2	1	8393490;564329595	Grm5
group033	1	1	3	1	564354239;564354237;157821675	H6pd
group130	1	9	2	1	392349939;672022705	Hepacam
group157	1	16	2	1	564363946;52138739	Hexa
group204	1	3	4	1	672047474;564343665;564343663;157823209	Hm13
group095	1	2	1	1	25742834	Hs3st1
group083	1	25	1	1	210032365	Hsp90b1
group019	1	10	1	1	148747550	Hspa13
group175	0	31	5	1	77404380;77404375;564363270;564363268;672061591	Hyou1
group224	1	7	1	1	6981068	Icam1
group109	0	12	1	1	285026497	Icam5
group181	1	15	4	1	564381819;62339335;564381817;564381813	Igsf8
group096	0	5	2	1	564377259;268607708	Il1rap
group205	1	4	11	1	77917546;672049951;672049949;672049947;672049945;672049943;672049941;672049939;672049937;672049935;672049933	Immt
group169	1	25	2	1	564341337;387157899	Itga6
group173	1	2	3	1	672057559;57528941;564357861	Itga7
group162	1	22	2	1	564302444;672046176	Itgav
group045	1	8	1	1	158517933	Itgb5
group025	1	6	2	1	157817947;564357619	Itgb8
group217	0	33	4	1	672088982;672088984;672088986;8393820	L1cam
group118	1	5	1	1	31543514	Lgmn
group085	1	13	5	1	672062029;672062026;564363846;564363844;213688408	Lingo1
group023	1	6	1	1	157817446	Lingo2
group150	1	1	1	1	51036677	Lmbrd1
group008	1	1	1	1	121583776	Lmf2
group148	1	2	36	21	47777291;672033703;672033708;564324270;672033710;564324069;672085771;6981494;672085769;261862309;77404172;57012384;564397024;57012420;672085767;672085765;57012416;57012402;564396450;57012342;672085761;672085757;672033463;57012424;57114336;57012426;197927431;77404170;77404174;564396658;113865837;564396600;6981492;672085904;57012390;564396598	LOC100365176;LOC102546968;LOC102557454;LOC683761;RT1-A;RT1-A1;RT1-A2;RT1-CE10;RT1-CE13;RT1-CE14;RT1-CE16;RT1-CE2;RT1-CE5;RT1-Cl;RT1-EC2;RT1-N1;RT1-N2;RT1-N3;RT1-T24-3;RT1-T24-4;Rt1.aa
group132	1	3	6	2	672050876;672050874;564399897;564399895;56090485;392355834	LOC100909548;M6pr
group120	0	15	6	4	32189350;672089498;672039583;672014566;392345613;392338713	LOC100909799;LOC689073;Slc25a31;Slc25a5
group201	1	16	4	2	672032816;672088585;672088587;672088626	LOC103694513;Tenm1
group122	1	5	1	1	325197225	Lppr4
group068	1	5	7	1	672035809;672035806;672035803;564327040;564327036;189163475;157817516	Lrfn1
group048	1	5	2	1	161760638;564367102	Lrfn2
group028	1	5	2	1	564327378;157819369	Lrfn3
group030	1	7	2	1	672056213;157820049	Lrfn5
group108	0	59	7	3	283837871;672058769;157823966;188536057;564349357;564332118;157821815	Lrp1;Lrp5;Lrp6
group231	1	8	2	1	77176454;77176452	Mcam
group038	1	4	1	1	157822793	Mcu
group141	1	11	1	1	40538872	Mdga2
group207	0	8	1	1	672056216	Mdga2
group229	1	9	3	2	6981654;564353172;8393848	Mecr;Thy1
group225	1	12	2	1	6981200;93277126	Mfge8
group006	1	4	1	1	11559935	Myo5a
group174	1	15	3	1	58865810;564361200;564361198	Naga
group145	0	25	1	1	42821116	Ncam2
group067	1	10	1	1	189011606	Nceh1
group003	0	14	1	1	11067409	Negr1
group199	1	34	2	1	672062665;672022994	Neo1
group089	1	39	7	1	237858623;564380430;672073600;672073598;283806636;672047935;564344832	Nfasc
group179	0	39	19	1	564380446;564380444;672073594;672073592;564380416;672073587;672073585;237858625;672073607;672073605;672073603;672073596;672073590;237858627;19924211;672073614;564380438;672073611;672073609	Nfasc
group021	1	35	2	1	157816949;564328178	Nomo1
group239	1	13	2	1	9507073;672062216	Nptn
group090	1	4	1	1	24308510	Nptx1
group126	1	7	1	1	36054040	Nptxr
group127	1	13	1	1	37620151	Nrxn1
group062	1	18	1	1	168823431	Nrxn3
group208	0	19	3	1	672056413;672056417;672056415	Nrxn3
group213	1	12	7	2	6981294;672080849;672080847;672080852;564390166;564337381;11024666	Ntrk1;Ntrk2
group237	1	10	3	1	9506939;397174820;397174822	Ntrk3
group058	1	8	2	1	16758020;564347908	Nup210
group087	1	1	1	1	21955259	Olfm3
group088	1	8	1	1	226874871	Omg
group149	1	9	3	1	564397875;564397873;51036657	P4ha1
group163	1	5	2	1	564365719;564310639	P4htm
group034	1	21	5	1	564387237;564387233;564387231;564387229;157822363	Pcdh17
group151	1	18	5	1	51854233;564383807;564383819;564383817;672076333	Pcdh7
group226	1	8	1	1	6981342	Pcsk2
group086	1	20	1	1	21489987	Pcyox1
group073	1	9	2	1	197384556;564393676	Pcyox1l
group144	1	15	1	1	42538976	Pgap1
group159	1	13	1	1	54633340	Pigs
group056	1	8	2	1	164663843;564344291	Pigt
group134	1	3	1	1	400153797	Plod1
group129	1	43	2	1	392347490;564304046	Plxna1
group117	1	29	1	1	310688889	Plxna2
group053	1	12	5	1	564329410;564329408;164518900;672088848;672088850	Plxna3
group196	0	44	2	1	672049453;672018245	Plxna4a
group209	1	24	2	1	672058561;564308472	Plxnc1
group054	1	5	2	1	164518932;564397476	Pofut2
group101	1	6	1	1	281332155	Poglut1
group187	1	16	4	1	672063616;672063614;672063612;57222294	Pomgnt2
group190	1	10	2	1	61556888;672048833	Pon2
group057	1	5	1	1	166064014	Prcp
group238	1	13	1	1	9507007	Ptgfrn
group172	1	14	5	1	564352390;564352388;564352384;564352382;9507013	Ptprf
group112	1	4	1	1	29789369	Ptprg
group097	1	1	2	1	274323760;672066323	Ptprm
group107	1	9	5	1	564345940;564345938;283046647;564345936;283046651	Ptprz1
group191	1	5	1	1	61889071	Rab10
group060	1	6	3	1	564340559;564340557;16758368	Rab14
group070	1	6	1	1	19424194	Rab3c
group203	1	7	1	1	672041398	Rab3c
group119	1	1	2	1	564345236;31543579	Reln
group039	1	2	3	1	672052313;564350865;157822809	RGD1309821
group210	1	14	5	1	672070416;672070414;672070412;672070410;11559953	Robo1
group211	1	11	4	1	672070422;672070420;672070418;281332151	Robo2
group049	0	2	3	1	564379465;162287391;564379463	Rpl6
group230	1	19	1	1	752993193	Rpn1
group047	1	4	1	1	158749626	Scamp1
group013	1	2	1	1	13928730	Scarb1
group135	1	4	3	1	402534531;8394245;402534527	Scn1b
group227	1	4	12	4	6981506;6981510;672045856;672045854;672045852;672045850;672045848;672045846;672045844;18959222;6981512;564374804	Scn2a;Scn3a;Scn4a;Scn9a
group069	1	7	1	1	19173736	Scpep1
group044	1	14	1	1	158341666	Sel1l
group139	1	10	8	1	672042946;564337168;564337166;564337164;403224995;672044885;672044882;157818903	Sema4a
group102	1	5	1	1	281427160	Sema4b
group105	1	11	1	1	281604106	Sema4d
group240	1	3	1	1	9507083	Sema4f
group059	1	5	3	1	564366915;16758220;564366913	Sema6b
group080	1	8	2	1	209863068;672062037	Sema7a
group233	1	13	1	1	8393057	Serpinh1
group022	1	1	1	1	157817061	Siae
group072	1	15	7	3	19705463;564342250;564342248;157820121;564395504;672084811;9507107	Slc12a4;Slc12a5;Slc12a6
group121	0	13	1	1	32189355	Slc25a4
group014	0	8	2	1	564344048;13929106	Slc32a1
group137	0	18	2	1	402743472;402743833	Slc3a2
group182	1	4	8	2	564383193;16758164;564383195;564383191;564383189;399124804;399124806;41054850	Slc4a4;Slc4a8
group027	1	2	3	1	672042681;564336816;157818529	Slitrk3
group114	0	1	13	1	672040486;672015002;672015000;672040484;672014998;564334059;564334057;300797077;564334055;564334053;564334051;564334061;564334049	Sorcs1
group064	1	22	2	1	170014691;672076678	Sorcs2
group082	1	10	4	1	209954677;564338480;564338484;564338482	Sort1
group092	1	3	1	1	25453372	Spon1
group228	1	5	1	1	6981540	St8sia3
group075	1	9	2	1	197927176;564363049	Stt3a
group104	1	5	1	1	281485606	Stt3b
group002	1	11	4	1	564344419;110626131;564344417;672048121	Sulf2
group212	1	1	3	1	672073283;72534840;672073281	Svop
group081	1	12	1	1	209870039	Synj1
group241	1	29	1	1	9910320	Tenm2
group099	1	5	4	1	564389094;281306744;672080115;672080113	Tenm3
group115	1	36	2	1	672037836;300798434	Tenm4
group100	1	21	3	1	564377126;564377124;281306746	Tfrc
group155	1	3	1	1	51948502	Tmem106b
group116	0	2	1	1	305632805	Tmem178b
group154	1	6	3	2	51948472;564364634;122891854	Tmem30a;Tmem30b
group110	1	7	3	1	564321018;293343193;564394339	Tmx3
group031	1	4	2	1	157820133;672071990	Ttyh3
group214	1	4	2	1	68163437;672081146	Txndc15
group071	1	3	3	1	19424302;564367912;564367910	Uggt1
group011	1	5	2	1	672083557;13027430	Wdr7

## Sheet: C
Supplementary file 1C .Core-glycosylated surface proteins (protein IDs, predicted topology, subcellular localization and N-glycosylation sites).
Protein ID (Ref. Seq.)	GI	Gene Symbol	Protein Description	Protein Type	# N-Glyc Sites	Cello Prediction	Cello Score
XP_008761930	672052593	Abca1	PREDICTED: ATP-binding cassette sub-family A member 1 isoform X1	multi-pass_membrane	11	PlasmaMembrane	3.043
XP_008761931	672052595	Abca1	PREDICTED: ATP-binding cassette sub-family A member 1 isoform X2	multi-pass_membrane	11	PlasmaMembrane	3.043
XP_008761932	672052597	Abca1	PREDICTED: ATP-binding cassette sub-family A member 1 isoform X3	multi-pass_membrane	11	PlasmaMembrane	3.094
NP_835196	30017417	Abca1	ATP-binding cassette sub-family A member 1	multi-pass_membrane	11	PlasmaMembrane	3.008
NP_001019485	66730294	Abhd12	monoacylglycerol lipase ABHD12	typeII_membrane	1	Mitochondrial	1.842
NP_071526	11990616	Acan	aggrecan core protein precursor	soluble_secreted	7	Nuclear	2.572
XP_006243431	564364463	Adam10	PREDICTED: disintegrin and metalloproteinase domain-containing protein 10 isoform X1	typeII_membrane	4	Nuclear	2.318
NP_062127	402794619	Adam10	disintegrin and metalloproteinase domain-containing protein 10 precursor	typeI_membrane	4	Nuclear	1.902
XP_008773893	672018019	Adam22	PREDICTED: disintegrin and metalloproteinase domain-containing protein 22	typeI_membrane	1	Extracellular	2.561
XP_008760970	672049055	Adam22	PREDICTED: disintegrin and metalloproteinase domain-containing protein 22	typeI_membrane	1	Extracellular	2.561
NP_001014772	62339281	Adam9	disintegrin and metalloproteinase domain-containing protein 9 precursor	typeI_membrane	5	Extracellular	2.532
XP_008774800	672022317	Adamts20	PREDICTED: A disintegrin and metalloproteinase with thrombospondin motifs 20 isoform X2	soluble_secreted	9	Extracellular	3.132
XP_008764101	672060701	Adamts20	PREDICTED: LOW QUALITY PROTEIN: A disintegrin and metalloproteinase with thrombospondin motifs 20 isoform X3	soluble_secreted	9	Extracellular	3.124
XP_006236977	564347895	Adamts9	PREDICTED: A disintegrin and metalloproteinase with thrombospondin motifs 9 isoform X1	soluble_secreted	9	Extracellular	3.037
XP_008761348	672050432	Adamts9	PREDICTED: A disintegrin and metalloproteinase with thrombospondin motifs 9 isoform X2	soluble_secreted	9	Extracellular	2.98
XP_006236978	564347897	Adamts9	PREDICTED: A disintegrin and metalloproteinase with thrombospondin motifs 9 isoform X3	soluble_secreted	9	Extracellular	3.026
NP_001101347	157823509	Adamts9	A disintegrin and metalloproteinase with thrombospondin motifs 9 precursor	soluble_secreted	9	Extracellular	3.006
XP_006231663	564334282	Add3	PREDICTED: gamma-adducin isoform X2	soluble_intracellular	0	Nuclear	3.288
XP_006231661	564334278	Add3	PREDICTED: gamma-adducin isoform X2	soluble_intracellular	0	Nuclear	3.288
XP_006231662	564334280	Add3	PREDICTED: gamma-adducin isoform X2	soluble_intracellular	0	Nuclear	3.288
XP_008758732	672040698	Add3	PREDICTED: gamma-adducin isoform X2	soluble_intracellular	0	Nuclear	3.288
XP_006231664	564334284	Add3	PREDICTED: gamma-adducin isoform X2	soluble_intracellular	0	Nuclear	3.288
XP_008758733	672040701	Add3	PREDICTED: gamma-adducin isoform X1	soluble_intracellular	0	Nuclear	2.998
NP_113740	255759898	Add3	gamma-adducin isoform 2	soluble_intracellular	0	Nuclear	2.998
NP_001157575	255759900	Add3	gamma-adducin isoform 1	soluble_intracellular	0	Nuclear	3.288
NP_689448	158711727	Adgrg1	G-protein coupled receptor 56 precursor	multi-pass_membrane	6	PlasmaMembrane	4.389
NP_075251	12621148	Adgrl1	latrophilin-1 precursor	multi-pass_membrane	7	PlasmaMembrane	3.432
NP_001177404	694874500	Adgrl2	adhesion G protein-coupled receptor L2 isoform 2 precursor	multi-pass_membrane	8	PlasmaMembrane	4.299
NP_001289137	694871014	Adgrl2	adhesion G protein-coupled receptor L2 isoform 3 precursor	multi-pass_membrane	8	PlasmaMembrane	4.315
NP_599235	694879431	Adgrl2	adhesion G protein-coupled receptor L2 isoform 1 precursor	multi-pass_membrane	8	PlasmaMembrane	4.283
NP_001289141	694879429	Adgrl2	adhesion G protein-coupled receptor L2 isoform 7 precursor	multi-pass_membrane	8	PlasmaMembrane	4.303
NP_001289138	694874778	Adgrl2	adhesion G protein-coupled receptor L2 isoform 4 precursor	multi-pass_membrane	8	PlasmaMembrane	4.346
NP_001289139	694868520	Adgrl2	adhesion G protein-coupled receptor L2 isoform 5 precursor	multi-pass_membrane	8	PlasmaMembrane	4.361
NP_001289140	694878102	Adgrl2	adhesion G protein-coupled receptor L2 isoform 6 precursor	multi-pass_membrane	8	PlasmaMembrane	4.325
NP_570835	18677755	Adgrl3	latrophilin-3 precursor	multi-pass_membrane	5	PlasmaMembrane	3.589
NP_001094180	213511844	Alg2	alpha-1,3/1,6-mannosyltransferase ALG2	soluble_intracellular	0	Cytoplasmic	1.723
XP_006235277	564343538	Apmap	PREDICTED: adipocyte plasma membrane-associated protein isoform X2	typeII_membrane	1	Cytoplasmic	1.018
XP_008760584	672047581	Apmap	PREDICTED: adipocyte plasma membrane-associated protein isoform X1	soluble_secreted	1	Cytoplasmic	1.08
XP_006235279	564343542	Apmap	PREDICTED: adipocyte plasma membrane-associated protein isoform X3	soluble_intracellular	0	Cytoplasmic	2.15
NP_001029175	77735352	Apmap	adipocyte plasma membrane-associated protein precursor	soluble_secreted	1	Cytoplasmic	1.08
NP_001030105	164519052	Arsa	arylsulfatase A precursor	soluble_secreted	3	Lysosomal	4.09
NP_254278	77993374	Arsb	arylsulfatase B precursor	soluble_secreted	5	Lysosomal	4.693
XP_006227529	564323127	Arxes2	PREDICTED: signal peptidase complex subunit 3	typeII_membrane	0	PlasmaMembrane	2.022
XP_006257345	564400084	Arxes2	PREDICTED: signal peptidase complex subunit 3	typeII_membrane	0	PlasmaMembrane	2.022
NP_445859	40254747	Asah1	acid ceramidase precursor	soluble_secreted	3	Lysosomal	4.209
XP_008767862	672074417	Astn1	PREDICTED: astrotactin-1 isoform X1	soluble_intracellular	0	Nuclear	3.119
XP_008767863	672074419	Astn1	PREDICTED: astrotactin-1 isoform X2	soluble_intracellular	0	Nuclear	3.174
NP_001164074	282158057	Astn1	astrotactin-1 precursor	multi-pass_membrane	7	Nuclear	3.006
NP_001258292	405113055	Astn2	astrotactin-2 precursor	multi-pass_membrane	5	Nuclear	1.993
NP_598201	675294847	Atp12a	potassium-transporting ATPase alpha chain 2 a	multi-pass_membrane	1	PlasmaMembrane	4.517
NP_001288593	675294849	Atp12a	potassium-transporting ATPase alpha chain 2 b	multi-pass_membrane	1	PlasmaMembrane	4.847
NP_036637	6978545	Atp1a2	sodium/potassium-transporting ATPase subunit alpha-2 precursor	multi-pass_membrane	0	PlasmaMembrane	4.039
XP_008757110	672034924	Atp1a3	PREDICTED: sodium/potassium-transporting ATPase subunit alpha-3 isoform X1	multi-pass_membrane	0	PlasmaMembrane	4.042
NP_036638	6978547	Atp1a3	sodium/potassium-transporting ATPase subunit alpha-3	multi-pass_membrane	0	PlasmaMembrane	3.999
NP_074039	12408294	Atp1a4	sodium/potassium-transporting ATPase subunit alpha-4	multi-pass_membrane	0	PlasmaMembrane	4.587
NP_001257959	402478613	Atp1a4	sodium/potassium-transporting ATPase subunit alpha-4	multi-pass_membrane	0	PlasmaMembrane	4.587
XP_006246642	564372502	Atp1b2	PREDICTED: sodium/potassium-transporting ATPase subunit beta-2 isoform X1	typeII_membrane	5	Extracellular	2.17
XP_006246643	564372504	Atp1b2	PREDICTED: sodium/potassium-transporting ATPase subunit beta-2 isoform X2	typeII_membrane	5	Extracellular	2.089
NP_036639	56799390	Atp1b2	sodium/potassium-transporting ATPase subunit beta-2	typeII_membrane	5	Extracellular	1.911
XP_008771841	672088934	Atp2b3	PREDICTED: plasma membrane calcium-transporting ATPase 3 isoform X1	multi-pass_membrane	5	PlasmaMembrane	2.917
XP_008771842	672088936	Atp2b3	PREDICTED: plasma membrane calcium-transporting ATPase 3 isoform X2	multi-pass_membrane	5	PlasmaMembrane	2.983
XP_008771843	672088938	Atp2b3	PREDICTED: plasma membrane calcium-transporting ATPase 3 isoform X3	multi-pass_membrane	5	PlasmaMembrane	2.862
XP_008771844	672088940	Atp2b3	PREDICTED: plasma membrane calcium-transporting ATPase 3 isoform X4	multi-pass_membrane	5	PlasmaMembrane	2.948
XP_008771845	672088942	Atp2b3	PREDICTED: plasma membrane calcium-transporting ATPase 3 isoform X5	multi-pass_membrane	5	PlasmaMembrane	2.854
XP_008771846	672088944	Atp2b3	PREDICTED: plasma membrane calcium-transporting ATPase 3 isoform X6	multi-pass_membrane	5	PlasmaMembrane	2.854
XP_008771847	672088946	Atp2b3	PREDICTED: plasma membrane calcium-transporting ATPase 3 isoform X7	multi-pass_membrane	5	PlasmaMembrane	2.812
XP_008771848	672088948	Atp2b3	PREDICTED: plasma membrane calcium-transporting ATPase 3 isoform X8	multi-pass_membrane	5	PlasmaMembrane	2.678
XP_008771849	672088950	Atp2b3	PREDICTED: plasma membrane calcium-transporting ATPase 3 isoform X9	multi-pass_membrane	5	PlasmaMembrane	2.873
NP_579822	158138481	Atp2b3	plasma membrane calcium-transporting ATPase 3	multi-pass_membrane	5	PlasmaMembrane	2.91
NP_113973	13929110	Atp6ap1	V-type proton ATPase subunit S1 precursor	multi-pass_membrane	7	PlasmaMembrane	4.094
XP_008763736	672027926	Atp8a1	PREDICTED: phospholipid-transporting ATPase IA isoform X1	multi-pass_membrane	0	PlasmaMembrane	4.604
XP_008768386	672076238	Atp8a1	PREDICTED: phospholipid-transporting ATPase IA isoform X2	multi-pass_membrane	0	PlasmaMembrane	4.599
XP_006251037	564383679	Atp8a1	PREDICTED: phospholipid-transporting ATPase IA isoform X3	multi-pass_membrane	0	PlasmaMembrane	4.576
XP_006251036	564383677	Atp8a1	PREDICTED: phospholipid-transporting ATPase IA isoform X4	multi-pass_membrane	0	PlasmaMembrane	4.542
XP_006251038	564383681	Atp8a1	PREDICTED: phospholipid-transporting ATPase IA isoform X5	multi-pass_membrane	0	PlasmaMembrane	4.639
XP_006251039	564383683	Atp8a1	PREDICTED: phospholipid-transporting ATPase IA isoform X6	multi-pass_membrane	0	PlasmaMembrane	4.61
XP_006251042	564383689	Atp8a1	PREDICTED: phospholipid-transporting ATPase IA isoform X7	multi-pass_membrane	0	PlasmaMembrane	4.492
XP_008768387	672076245	Atp8a1	PREDICTED: phospholipid-transporting ATPase IA isoform X8	multi-pass_membrane	0	PlasmaMembrane	4.489
XP_006223866	564299497	Atrnl1	PREDICTED: attractin-like protein 1 isoform X1	typeII_membrane	14	Extracellular	2.372
XP_008758809	672040941	Atrnl1	PREDICTED: attractin-like protein 1 isoform X2	typeII_membrane	14	Extracellular	2.515
XP_008757336	672026568	B3galtl	PREDICTED: beta-1,3-glucosyltransferase isoform X1, partial	soluble_intracellular	0	Mitochondrial	1.26
XP_008767276	672072366	B3galtl	PREDICTED: beta-1,3-glucosyltransferase isoform X2	soluble_intracellular	0	Nuclear	2.091
XP_006232657	564337070	Bcan	PREDICTED: brevican core protein isoform X2	soluble_intracellular	0	Nuclear	1.878
XP_006232658	564337073	Bcan	PREDICTED: brevican core protein isoform X1	soluble_secreted	2	Nuclear	1.537
XP_006232659	564337075	Bcan	PREDICTED: brevican core protein isoform X1	soluble_secreted	2	Nuclear	1.537
NP_001028837	75992948	Bcan	brevican core protein isoform 1 precursor	soluble_secreted	2	Nuclear	1.537
NP_037048	75992946	Bcan	brevican core protein isoform 2 precursor	soluble_secreted	2	Nuclear	1.347
XP_006250027	564380987	Brinp3	PREDICTED: BMP/retinoic acid-inducible neural-specific protein 3 isoform X1	typeI_membrane	5	PlasmaMembrane	1.666
NP_775144	27465571	Brinp3	BMP/retinoic acid-inducible neural-specific protein 3 precursor	typeI_membrane	5	PlasmaMembrane	1.666
XP_008766593	672069788	Btbd17	PREDICTED: BTB/POZ domain-containing protein 17 isoform X1	soluble_intracellular	0	PlasmaMembrane	1.713
XP_006247753	564375117	Btbd17	PREDICTED: BTB/POZ domain-containing protein 17 isoform X2	soluble_secreted	4	Mitochondrial	1.957
XP_006247754	564375119	Btbd17	PREDICTED: BTB/POZ domain-containing protein 17 isoform X3	soluble_secreted	4	Mitochondrial	1.957
NP_001128006	197385182	Btbd17	BTB/POZ domain-containing protein 17 precursor	soluble_secreted	4	PlasmaMembrane	1.683
XP_006243796	564365394	Cacna2d2	PREDICTED: voltage-dependent calcium channel subunit alpha-2/delta-2 isoform X1	soluble_intracellular	0	PlasmaMembrane	1.104
XP_006243797	564365396	Cacna2d2	PREDICTED: voltage-dependent calcium channel subunit alpha-2/delta-2 isoform X2	soluble_intracellular	0	PlasmaMembrane	1.097
XP_006243798	564365398	Cacna2d2	PREDICTED: voltage-dependent calcium channel subunit alpha-2/delta-2 isoform X3	soluble_intracellular	0	PlasmaMembrane	1.186
XP_006243799	564365400	Cacna2d2	PREDICTED: voltage-dependent calcium channel subunit alpha-2/delta-2 isoform X4	soluble_intracellular	0	PlasmaMembrane	1.192
NP_783182	28212250	Cacna2d2	voltage-dependent calcium channel subunit alpha-2/delta-2 precursor	soluble_intracellular	0	PlasmaMembrane	1.051
XP_006251134	564383955	Cd38	PREDICTED: ADP-ribosyl cyclase/cyclic ADP-ribose hydrolase 1 isoform X1	typeII_membrane	4	Extracellular	2.947
NP_037259	6978629	Cd38	ADP-ribosyl cyclase/cyclic ADP-ribose hydrolase 1	typeII_membrane	4	Extracellular	2.416
XP_006234689	564342033	Cd44	PREDICTED: CD44 antigen isoform X1	typeI_membrane	9	Extracellular	2.262
XP_008760277	672046382	Cd44	PREDICTED: CD44 antigen isoform X2	typeI_membrane	9	Extracellular	2.656
XP_008760278	672046384	Cd44	PREDICTED: CD44 antigen isoform X3	typeI_membrane	8	Extracellular	2.34
XP_006234691	564342037	Cd44	PREDICTED: CD44 antigen isoform X4	typeI_membrane	7	Extracellular	2.306
XP_008760279	672046387	Cd44	PREDICTED: CD44 antigen isoform X5	typeI_membrane	8	Extracellular	2.418
XP_008760280	672046389	Cd44	PREDICTED: CD44 antigen isoform X6	typeI_membrane	7	Extracellular	1.82
XP_006234693	564342041	Cd44	PREDICTED: CD44 antigen isoform X7	typeI_membrane	4	Extracellular	1.497
XP_008760281	672046392	Cd44	PREDICTED: CD44 antigen isoform X8	typeI_membrane	10	Nuclear	1.926
NP_037056	19923703	Cd44	CD44 antigen precursor	typeI_membrane	10	Nuclear	1.921
XP_006248324	564376633	Cd47	PREDICTED: leukocyte surface antigen CD47 isoform X1	multi-pass_membrane	5	PlasmaMembrane	4.644
XP_006248325	564376636	Cd47	PREDICTED: leukocyte surface antigen CD47 isoform X2	multi-pass_membrane	5	PlasmaMembrane	4.491
XP_006248326	564376638	Cd47	PREDICTED: leukocyte surface antigen CD47 isoform X3	multi-pass_membrane	5	PlasmaMembrane	4.501
XP_006248327	564376640	Cd47	PREDICTED: leukocyte surface antigen CD47 isoform X4	multi-pass_membrane	5	PlasmaMembrane	4.372
XP_006248328	564376643	Cd47	PREDICTED: leukocyte surface antigen CD47 isoform X5	multi-pass_membrane	5	PlasmaMembrane	4.883
XP_006248329	564376645	Cd47	PREDICTED: leukocyte surface antigen CD47 isoform X6	multi-pass_membrane	5	PlasmaMembrane	4.736
XP_006248330	564376647	Cd47	PREDICTED: leukocyte surface antigen CD47 isoform X7	multi-pass_membrane	4	PlasmaMembrane	4.864
NP_062068	9506469	Cd47	leukocyte surface antigen CD47 precursor	multi-pass_membrane	5	PlasmaMembrane	4.448
XP_006255121	564394398	Cdh11	PREDICTED: cadherin-11 isoform X1	typeI_membrane	2	Cytoplasmic	2.296
NP_445844	281427192	Cdh11	cadherin-11	typeI_membrane	2	Cytoplasmic	2.296
NP_001099702	157819501	Clptm1	cleft lip and palate transmembrane protein 1	multi-pass_membrane	6	PlasmaMembrane	3.15
XP_006227853	564324974	Clptm1l	PREDICTED: cleft lip and palate transmembrane protein 1-like protein isoform X1	multi-pass_membrane	0	PlasmaMembrane	3.794
NP_001101710	157817931	Clptm1l	cleft lip and palate transmembrane protein 1-like protein	multi-pass_membrane	0	PlasmaMembrane	3.763
XP_006252156	564386466	Clu	PREDICTED: clusterin isoform X1	soluble_secreted	6	Nuclear	4.069
NP_444180	46048420	Clu	clusterin precursor	soluble_secreted	6	Nuclear	3.883
XP_006242239	564361428	Cntn1	PREDICTED: contactin-1 isoform X1	soluble_secreted	9	PlasmaMembrane	1.207
XP_008763881	672059772	Cntn1	PREDICTED: contactin-1 isoform X2	soluble_secreted	8	Chloroplast	1.563
NP_476459	16923964	Cntn1	contactin-1 precursor	soluble_secreted	9	PlasmaMembrane	1.207
XP_006249808	564380454	Cntn2	PREDICTED: contactin-2 isoform X1	typeI_membrane	9	Chloroplast	1.246
XP_008767649	672073642	Cntn2	PREDICTED: contactin-2 isoform X2	typeI_membrane	9	Chloroplast	1.201
NP_037016	6981632	Cntn2	contactin-2 precursor	typeI_membrane	9	Chloroplast	1.269
NP_001100902	157818225	Cntnap4	contactin-associated protein-like 4 precursor	typeI_membrane	11	Extracellular	1.871
NP_036968	6978699	Cpd	carboxypeptidase D precursor	typeI_membrane	11	Cytoplasmic	1.395
NP_037260	6978701	Cpe	carboxypeptidase E precursor	soluble_secreted	2	Cytoplasmic	2.335
NP_599161	42476045	Ctsd	cathepsin D precursor	typeI_membrane	2	Lysosomal	4.046
XP_008770309	672083258	Dcc	PREDICTED: netrin receptor DCC isoform X1	typeII_membrane	7	Nuclear	2.723
XP_008770310	672083260	Dcc	PREDICTED: netrin receptor DCC isoform X2	typeII_membrane	7	Nuclear	2.65
NP_036973	6978755	Dcc	netrin receptor DCC precursor	multi-pass_membrane	7	Nuclear	2.261
XP_006234818	564342364	Disp2	PREDICTED: protein dispatched homolog 2 isoform X1	multi-pass_membrane	3	PlasmaMembrane	3.592
NP_001101229	299829287	Disp2	protein dispatched homolog 2	multi-pass_membrane	3	PlasmaMembrane	3.592
NP_001015021	62543491	Dnajb11	dnaJ homolog subfamily B member 11 precursor	typeI_membrane	1	Cytoplasmic	3.365
NP_001102164	157822779	Dnajc11	dnaJ homolog subfamily C member 11	soluble_intracellular	0	Nuclear	1.925
XP_008767707	672073811	Dpp10	PREDICTED: inactive dipeptidyl peptidase 10 isoform X1	soluble_intracellular	0	Nuclear	1.458
NP_001012205	58865978	Dpp10	inactive dipeptidyl peptidase 10	typeII_membrane	9	PlasmaMembrane	2.084
XP_006235942	564345250	Dpp6	PREDICTED: dipeptidyl aminopeptidase-like protein 6 isoform X1	typeII_membrane	6	Nuclear	1.594
NP_074041	12408298	Dpp6	dipeptidyl aminopeptidase-like protein 6	typeII_membrane	6	Cytoplasmic	1.54
NP_001101611	157822543	Dscaml1	Down syndrome cell adhesion molecule-like protein 1	soluble_intracellular	0	Nuclear	2.14
XP_008768638	672077143	Egfr	PREDICTED: epidermal growth factor receptor isoform X1	multi-pass_membrane	12	Extracellular	2.078
XP_008768639	672077145	Egfr	PREDICTED: epidermal growth factor receptor isoform X2	multi-pass_membrane	12	Extracellular	1.854
XP_008768640	672077147	Egfr	PREDICTED: epidermal growth factor receptor isoform X3	soluble_intracellular	0	Extracellular	4.209
NP_113695	25742617	Egfr	epidermal growth factor receptor precursor	multi-pass_membrane	12	Extracellular	2.228
XP_006248986	564378373	Elfn1	PREDICTED: protein ELFN1 isoform X1	typeI_membrane	8	Nuclear	1.72
XP_008767171	672071938	Elfn1	PREDICTED: protein ELFN1 isoform X1	typeI_membrane	8	Nuclear	1.72
XP_006248988	564378377	Elfn1	PREDICTED: protein ELFN1 isoform X1	typeI_membrane	8	Nuclear	1.72
NP_001099383	157786876	Elfn1	protein ELFN1 precursor	typeI_membrane	8	Nuclear	1.72
XP_008774773	672022247	Elfn2	PREDICTED: LOW QUALITY PROTEIN: protein phosphatase 1 regulatory subunit 29 isoform X1, partial	typeI_membrane	7	Nuclear	1.74
XP_006242103	672060362	Elfn2	PREDICTED: protein phosphatase 1 regulatory subunit 29 isoform X2	typeI_membrane	7	Nuclear	1.647
NP_446171	16758534	Emb	embigin precursor	typeI_membrane	8	Extracellular	2.049
XP_006239307	564353698	Emc1	PREDICTED: ER membrane protein complex subunit 1 isoform X1	soluble_secreted	3	PlasmaMembrane	1.738
NP_001102160	157822661	Emc1	ER membrane protein complex subunit 1 precursor	soluble_secreted	3	PlasmaMembrane	1.698
XP_006239506	564354207	Eno1	PREDICTED: alpha-enolase isoform X1	soluble_intracellular	0	Cytoplasmic	3.33
NP_001103378	158186651	Eno1	alpha-enolase	soluble_intracellular	0	Cytoplasmic	3.615
NP_036686	158186649	Eno1	alpha-enolase	soluble_intracellular	0	Cytoplasmic	3.615
XP_006246661	564372540	Eno3	PREDICTED: beta-enolase isoform X1	soluble_intracellular	0	Cytoplasmic	4.247
XP_006246662	564372542	Eno3	PREDICTED: beta-enolase isoform X1	soluble_intracellular	0	Cytoplasmic	4.247
NP_037081	126723393	Eno3	beta-enolase	soluble_intracellular	0	Cytoplasmic	4.247
XP_006233706	564339627	Entpd2	PREDICTED: ectonucleoside triphosphate diphosphohydrolase 2 isoform X1	multi-pass_membrane	7	PlasmaMembrane	2.362
XP_008759828	672044723	Entpd2	PREDICTED: ectonucleoside triphosphate diphosphohydrolase 2 isoform X2	typeI_membrane	6	Extracellular	2.173
NP_742027	25282445	Entpd2	ectonucleoside triphosphate diphosphohydrolase 2 precursor	multi-pass_membrane	7	PlasmaMembrane	3.429
NP_058699	77020289	Erbb2	receptor tyrosine-protein kinase erbB-2 precursor	multi-pass_membrane	7	Extracellular	1.538
NP_067719	11067415	Erbb4	receptor tyrosine-protein kinase erbB-4 precursor	typeI_membrane	11	Extracellular	1.881
XP_003752358	392331685	Ergic1	PREDICTED: endoplasmic reticulum-Golgi intermediate compartment protein 1 isoform X1	multi-pass_membrane	0	PlasmaMembrane	2.203
XP_008765850	672067122	Ergic1	PREDICTED: endoplasmic reticulum-Golgi intermediate compartment protein 1 isoform X2	multi-pass_membrane	0	PlasmaMembrane	1.978
XP_008769545	672080405	Erlin2	PREDICTED: erlin-2 isoform X1	soluble_secreted	1	Cytoplasmic	2.656
XP_008769546	672080407	Erlin2	PREDICTED: erlin-2 isoform X1	soluble_secreted	1	Cytoplasmic	2.656
NP_001099558	157823984	Erlin2	erlin-2	soluble_secreted	1	Cytoplasmic	2.656
XP_006231303	564333337	Ermp1	PREDICTED: endoplasmic reticulum metallopeptidase 1 isoform X1	multi-pass_membrane	1	PlasmaMembrane	4.824
NP_908939	42491372	Ermp1	endoplasmic reticulum metallopeptidase 1	multi-pass_membrane	1	PlasmaMembrane	4.817
NP_612537	19924061	Ero1a	ERO1-like protein alpha precursor	soluble_secreted	2	Cytoplasmic	2.162
XP_006254437	564392540	Ero1lb	PREDICTED: ERO1-like protein beta isoform X1	soluble_intracellular	0	Cytoplasmic	1.722
XP_008770098	672082457	Ero1lb	PREDICTED: ERO1-like protein beta isoform X2	soluble_intracellular	0	Nuclear	3.118
NP_037189	52138595	F3	tissue factor precursor	multi-pass_membrane	5	PlasmaMembrane	2.011
XP_006222525	564320180	Fam171a1	PREDICTED: protein FAM171A1 isoform X1	typeII_membrane	0	Nuclear	3.935
XP_006222526	564320182	Fam171a1	PREDICTED: protein FAM171A1 isoform X2	typeII_membrane	0	Nuclear	3.811
XP_008772249	672030283	Fam171a1	PREDICTED: protein FAM171A1 isoform X3	typeII_membrane	0	Nuclear	3.703
XP_006222527	564320184	Fam171a1	PREDICTED: protein FAM171A1 isoform X3	typeII_membrane	0	Nuclear	3.703
XP_008770152	672082668	Fam171a1	PREDICTED: protein FAM171A1 isoform X4	soluble_secreted	3	Nuclear	3.351
XP_006221089	564313986	Fam171a2	PREDICTED: protein FAM171A2 isoform X1	typeI_membrane	4	PlasmaMembrane	2.274
XP_002727867	392351637	Fam171a2	PREDICTED: protein FAM171A2 isoform X2	multi-pass_membrane	4	PlasmaMembrane	2.152
XP_006247535	564374603	Fam171a2	PREDICTED: protein FAM171A2 isoform X3	typeI_membrane	4	PlasmaMembrane	1.995
XP_006247536	564374605	Fam171a2	PREDICTED: protein FAM171A2 isoform X4	multi-pass_membrane	3	Nuclear	2.66
NP_001102122	157821545	Fam234b	uncharacterized protein KIAA1467 homolog	typeII_membrane	5	PlasmaMembrane	1.281
NP_001007647	56090566	Fkbp9	peptidyl-prolyl cis-trans isomerase FKBP9 precursor	typeI_membrane	4	Extracellular	0.933
NP_476533	17105334	Folh1	glutamate carboxypeptidase 2	typeII_membrane	8	Cytoplasmic	1.314
NP_036694	158186726	Fuca1	tissue alpha-L-fucosidase precursor	typeI_membrane	2	Lysosomal	4.439
NP_001004218	51948408	Fuca2	plasma alpha-L-fucosidase precursor	soluble_secreted	2	Lysosomal	3.716
XP_006246185	564371390	Gabra1	PREDICTED: gamma-aminobutyric acid receptor subunit alpha-1 isoform X1	multi-pass_membrane	2	PlasmaMembrane	4.23
XP_006246186	564371392	Gabra1	PREDICTED: gamma-aminobutyric acid receptor subunit alpha-1 isoform X1	multi-pass_membrane	2	PlasmaMembrane	4.23
NP_899155	34328532	Gabra1	gamma-aminobutyric acid receptor subunit alpha-1 precursor	multi-pass_membrane	2	PlasmaMembrane	4.23
XP_006250993	564383581	Gabra2	PREDICTED: gamma-aminobutyric acid receptor subunit alpha-2 isoform X1	multi-pass_membrane	2	PlasmaMembrane	4.709
NP_001129251	209413778	Gabra2	gamma-aminobutyric acid receptor subunit alpha-2 precursor	multi-pass_membrane	2	PlasmaMembrane	4.687
XP_006246189	564371404	Gabrb2	PREDICTED: gamma-aminobutyric acid receptor subunit beta-2 isoform X1	multi-pass_membrane	3	PlasmaMembrane	4.851
XP_008765857	672067140	Gabrb2	PREDICTED: gamma-aminobutyric acid receptor subunit beta-2 isoform X2	multi-pass_membrane	3	PlasmaMembrane	4.678
NP_037089	6978869	Gabrb2	gamma-aminobutyric acid receptor subunit beta-2 precursor	multi-pass_membrane	3	PlasmaMembrane	4.851
NP_058761	8393390	Gabrb3	gamma-aminobutyric acid receptor subunit beta-3 precursor	multi-pass_membrane	3	PlasmaMembrane	4.779
NP_542153	18034793	Gabrg1	gamma-aminobutyric acid receptor subunit gamma-1 precursor	multi-pass_membrane	3	PlasmaMembrane	4.842
XP_006246187	564371394	Gabrg2	PREDICTED: gamma-aminobutyric acid receptor subunit gamma-2 isoform X1	multi-pass_membrane	3	PlasmaMembrane	4.72
NP_899156	34328527	Gabrg2	gamma-aminobutyric acid receptor subunit gamma-2 precursor	multi-pass_membrane	3	PlasmaMembrane	4.771
NP_001041316	114145565	Galns	N-acetylgalactosamine-6-sulfatase precursor	typeI_membrane	2	Lysosomal	4.159
XP_008767555	672073340	Galnt9	PREDICTED: polypeptide N-acetylgalactosaminyltransferase 9 isoform X1	typeII_membrane	1	Cytoplasmic	1.272
XP_008767556	672073342	Galnt9	PREDICTED: polypeptide N-acetylgalactosaminyltransferase 9 isoform X2	soluble_intracellular	0	Cytoplasmic	1.664
NP_001116116	169790950	Galnt9	polypeptide N-acetylgalactosaminyltransferase 9 isoform A	typeII_membrane	1	Cytoplasmic	1.463
XP_006231038	564332724	Ganab	PREDICTED: neutral alpha-glucosidase AB isoform X1	typeI_membrane	1	Cytoplasmic	1.112
XP_006231039	564332726	Ganab	PREDICTED: neutral alpha-glucosidase AB isoform X2	typeI_membrane	1	Cytoplasmic	1.203
NP_001099804	157822919	Ganab	neutral alpha-glucosidase AB	soluble_intracellular	0	Lysosomal	1.274
NP_113937	13994184	Gcs1	mannosyl-oligosaccharide glucosidase	typeII_membrane	1	Mitochondrial	1.473
NP_116004	47575864	Gde1	glycerophosphodiester phosphodiesterase 1	soluble_intracellular	0	PlasmaMembrane	1.726
XP_008760522	672047395	Ggt7	PREDICTED: gamma-glutamyltransferase 7 isoform X1	typeII_membrane	6	Cytoplasmic	1.712
XP_008760523	672047397	Ggt7	PREDICTED: gamma-glutamyltransferase 7 isoform X2	typeII_membrane	6	Cytoplasmic	1.631
NP_569107	208973252	Ggt7	gamma-glutamyltransferase 7	typeII_membrane	6	Cytoplasmic	1.723
XP_006252848	564388312	Ghitm	PREDICTED: growth hormone-inducible transmembrane protein isoform X1	multi-pass_membrane	0	PlasmaMembrane	4.135
NP_001005908	54400718	Ghitm	growth hormone-inducible transmembrane protein	multi-pass_membrane	0	PlasmaMembrane	4.135
XP_006256565	564398071	Gja1	PREDICTED: gap junction alpha-1 protein isoform X1	multi-pass_membrane	0	PlasmaMembrane	3.114
NP_036699	6978896	Gja1	gap junction alpha-1 protein	multi-pass_membrane	0	PlasmaMembrane	3.114
NP_001102290	348605144	Gla	alpha-galactosidase A	soluble_intracellular	0	Lysosomal	4.206
NP_001101662	157824103	Glb1	beta-galactosidase precursor	soluble_secreted	7	Lysosomal	3.826
NP_001004240	51948452	Gpaa1	glycosylphosphatidylinositol anchor attachment 1 protein	multi-pass_membrane	1	PlasmaMembrane	4.495
NP_997475	46485440	Gpi	glucose-6-phosphate isomerase	soluble_intracellular	0	Cytoplasmic	3.157
XP_008770486	672084038	Gpr56	PREDICTED: G-protein coupled receptor 56 isoform X2	multi-pass_membrane	6	PlasmaMembrane	4.477
XP_008770487	672084040	Gpr56	PREDICTED: G-protein coupled receptor 56 isoform X2	multi-pass_membrane	6	PlasmaMembrane	4.477
XP_008770488	672084042	Gpr56	PREDICTED: G-protein coupled receptor 56 isoform X1	multi-pass_membrane	6	PlasmaMembrane	4.389
XP_008770489	672084044	Gpr56	PREDICTED: G-protein coupled receptor 56 isoform X1	multi-pass_membrane	6	PlasmaMembrane	4.389
XP_008770490	672084046	Gpr56	PREDICTED: G-protein coupled receptor 56 isoform X1	multi-pass_membrane	6	PlasmaMembrane	4.389
XP_008770491	672084048	Gpr56	PREDICTED: G-protein coupled receptor 56 isoform X1	multi-pass_membrane	6	PlasmaMembrane	4.389
XP_008770492	672084050	Gpr56	PREDICTED: G-protein coupled receptor 56 isoform X1	multi-pass_membrane	6	PlasmaMembrane	4.389
XP_006255128	564394440	Gpr56	PREDICTED: G-protein coupled receptor 56 isoform X1	multi-pass_membrane	6	PlasmaMembrane	4.389
NP_113796	29789269	Gria1	glutamate receptor 1 precursor	multi-pass_membrane	6	PlasmaMembrane	4.458
NP_058957	8393475	Gria2	glutamate receptor 2 isoform 1 precursor	multi-pass_membrane	4	PlasmaMembrane	4.376
NP_001077280	139394534	Gria2	glutamate receptor 2 isoform 2 precursor	multi-pass_membrane	4	PlasmaMembrane	4.413
XP_008771734	672088527	Gria3	PREDICTED: glutamate receptor 3 isoform X4	multi-pass_membrane	4	PlasmaMembrane	3.873
NP_116785	163792203	Gria3	glutamate receptor 3 isoform 1 precursor	multi-pass_membrane	4	PlasmaMembrane	4.352
NP_001106213	163792205	Gria3	glutamate receptor 3 isoform 2 precursor	multi-pass_membrane	4	PlasmaMembrane	4.358
NP_077354	13259380	Grid1	glutamate receptor ionotropic, delta-1 precursor	multi-pass_membrane	3	PlasmaMembrane	3.71
XP_006248115	564376065	Grik1	PREDICTED: glutamate receptor ionotropic, kainate 1 isoform X1	multi-pass_membrane	9	PlasmaMembrane	4.449
XP_006248116	564376067	Grik1	PREDICTED: glutamate receptor ionotropic, kainate 1 isoform X2	multi-pass_membrane	9	PlasmaMembrane	4.365
NP_001104584	163659909	Grik1	glutamate receptor ionotropic, kainate 1 isoform 3	multi-pass_membrane	9	PlasmaMembrane	4.498
NP_058937	8393481	Grik1	glutamate receptor ionotropic, kainate 1 isoform 2	multi-pass_membrane	9	PlasmaMembrane	4.45
NP_001104587	163659911	Grik1	glutamate receptor ionotropic, kainate 1 isoform 1	multi-pass_membrane	9	PlasmaMembrane	4.36
NP_062182	9506755	Grik2	glutamate receptor ionotropic, kainate 2 precursor	multi-pass_membrane	9	PlasmaMembrane	4.524
XP_006238919	564352814	Grik3	PREDICTED: glutamate receptor ionotropic, kainate 3 isoform X1	multi-pass_membrane	10	PlasmaMembrane	3.938
NP_852038	163659913	Grik3	glutamate receptor ionotropic, kainate 3 isoform 2 precursor	multi-pass_membrane	10	PlasmaMembrane	4.188
NP_001106187	163659915	Grik3	glutamate receptor ionotropic, kainate 3 isoform 1 precursor	multi-pass_membrane	10	PlasmaMembrane	4.551
NP_001257537	396578157	Grin1	glutamate receptor ionotropic, NMDA 1 isoform 4b precursor	multi-pass_membrane	10	PlasmaMembrane	3.397
NP_001257539	396578159	Grin1	glutamate receptor ionotropic, NMDA 1 isoform 4a precursor	multi-pass_membrane	10	PlasmaMembrane	3.667
NP_036705	140971205	Grin2a	glutamate receptor ionotropic, NMDA 2A precursor	multi-pass_membrane	12	PlasmaMembrane	3.693
NP_036706	6980984	Grin2b	glutamate receptor ionotropic, NMDA 2B precursor	multi-pass_membrane	10	PlasmaMembrane	3.662
XP_006229721	564329595	Grm5	PREDICTED: metabotropic glutamate receptor 5 isoform X1	multi-pass_membrane	6	PlasmaMembrane	4.447
NP_058708	8393490	Grm5	metabotropic glutamate receptor 5 precursor	multi-pass_membrane	6	PlasmaMembrane	4.493
XP_006239521	564354237	H6pd	PREDICTED: GDH/6PGL endoplasmic bifunctional protein isoform X1	soluble_secreted	2	Cytoplasmic	1.713
XP_006239522	564354239	H6pd	PREDICTED: GDH/6PGL endoplasmic bifunctional protein isoform X1	soluble_secreted	2	Cytoplasmic	1.713
NP_001100168	157821675	H6pd	GDH/6PGL endoplasmic bifunctional protein precursor	soluble_secreted	2	Cytoplasmic	1.626
XP_008774913	672022705	Hepacam	PREDICTED: hepatocyte cell adhesion molecule isoform X1	soluble_intracellular	0	Nuclear	2.845
XP_002729937	392349939	Hepacam	PREDICTED: LOW QUALITY PROTEIN: hepatocyte cell adhesion molecule isoform X2	typeII_membrane	6	Nuclear	3.421
XP_006243224	564363946	Hexa	PREDICTED: beta-hexosaminidase subunit alpha isoform X1	soluble_intracellular	0	Lysosomal	2.418
NP_001004443	52138739	Hexa	beta-hexosaminidase subunit alpha precursor	typeI_membrane	5	Lysosomal	3.955
NP_001011946	58865470	Hexb	beta-hexosaminidase subunit beta precursor	typeI_membrane	2	Lysosomal	3.44
XP_006235330	564343663	Hm13	PREDICTED: minor histocompatibility antigen H13 isoform X1	multi-pass_membrane	2	PlasmaMembrane	4.942
XP_006235331	564343665	Hm13	PREDICTED: minor histocompatibility antigen H13 isoform X2	multi-pass_membrane	2	PlasmaMembrane	4.908
XP_008760552	672047474	Hm13	PREDICTED: minor histocompatibility antigen H13 isoform X3	multi-pass_membrane	2	PlasmaMembrane	4.907
NP_001101259	157823209	Hm13	minor histocompatibility antigen H13	multi-pass_membrane	2	PlasmaMembrane	4.937
NP_445843	25742834	Hs3st1	heparan sulfate glucosamine 3-O-sulfotransferase 1 precursor	soluble_secreted	4	Mitochondrial	1.966
NP_001012197	210032365	Hsp90b1	endoplasmin precursor	soluble_secreted	5	ER	3.753
NP_062144	148747550	Hspa13	heat shock 70 kDa protein 13 precursor	typeI_membrane	4	Cytoplasmic	2.23
XP_008764365	672061591	Hyou1	PREDICTED: hypoxia up-regulated protein 1 isoform X2	typeII_membrane	5	Cytoplasmic	2.408
XP_006242946	564363268	Hyou1	PREDICTED: hypoxia up-regulated protein 1 isoform X1	typeI_membrane	5	Cytoplasmic	2.795
XP_006242947	564363270	Hyou1	PREDICTED: hypoxia up-regulated protein 1 isoform X1	typeI_membrane	5	Cytoplasmic	2.795
NP_620222	77404380	Hyou1	hypoxia up-regulated protein 1 precursor	typeI_membrane	5	Cytoplasmic	2.795
NP_001029200	77404375	Hyou1	hypoxia up-regulated protein 1 precursor	typeI_membrane	5	Cytoplasmic	2.795
NP_037099	6981068	Icam1	intercellular adhesion molecule 1 precursor	multi-pass_membrane	8	Nuclear	2.171
NP_001165550	285026497	Icam5	intercellular adhesion molecule 5	multi-pass_membrane	12	PlasmaMembrane	1.613
XP_006250348	564381813	Igsf8	PREDICTED: immunoglobulin superfamily member 8 isoform X2	typeII_membrane	4	Mitochondrial	1.085
XP_006250350	564381817	Igsf8	PREDICTED: immunoglobulin superfamily member 8 isoform X1	typeI_membrane	4	Mitochondrial	1.238
XP_006250351	564381819	Igsf8	PREDICTED: immunoglobulin superfamily member 8 isoform X3	typeII_membrane	3	Mitochondrial	1.504
NP_001014787	62339335	Igsf8	immunoglobulin superfamily member 8 precursor	typeI_membrane	4	Mitochondrial	1.238
XP_006248566	564377259	Il1rap	PREDICTED: interleukin-1 receptor accessory protein isoform X1	typeI_membrane	8	PlasmaMembrane	2.018
NP_001161312	268607708	Il1rap	interleukin-1 receptor accessory protein isoform b precursor	typeI_membrane	1	PlasmaMembrane	2.023
XP_008761203	672049933	Immt	PREDICTED: mitochondrial inner membrane protein isoform X1	soluble_intracellular	0	Cytoplasmic	2.172
XP_008761204	672049935	Immt	PREDICTED: mitochondrial inner membrane protein isoform X2	soluble_intracellular	0	Cytoplasmic	2.16
XP_008761205	672049937	Immt	PREDICTED: mitochondrial inner membrane protein isoform X3	soluble_intracellular	0	Cytoplasmic	2.158
XP_008761206	672049939	Immt	PREDICTED: mitochondrial inner membrane protein isoform X4	soluble_intracellular	0	Cytoplasmic	2.179
XP_008761207	672049941	Immt	PREDICTED: mitochondrial inner membrane protein isoform X5	soluble_intracellular	0	Cytoplasmic	2.178
XP_008761208	672049943	Immt	PREDICTED: mitochondrial inner membrane protein isoform X6	soluble_intracellular	0	Cytoplasmic	2.099
XP_008761209	672049945	Immt	PREDICTED: mitochondrial inner membrane protein isoform X7	soluble_intracellular	0	Cytoplasmic	2.049
XP_008761210	672049947	Immt	PREDICTED: mitochondrial inner membrane protein isoform X8	soluble_intracellular	0	Cytoplasmic	2.062
XP_008761211	672049949	Immt	PREDICTED: mitochondrial inner membrane protein isoform X9	soluble_intracellular	0	Cytoplasmic	2.028
XP_008761212	672049951	Immt	PREDICTED: mitochondrial inner membrane protein isoform X10	soluble_intracellular	0	Cytoplasmic	1.815
NP_001030100	77917546	Immt	MICOS complex subunit Mic60	soluble_intracellular	0	Cytoplasmic	1.719
XP_006234413	564341337	Itga6	PREDICTED: integrin alpha-6 isoform X1	typeI_membrane	6	Nuclear	1.474
NP_446177	387157899	Itga6	integrin alpha-6 precursor	typeI_membrane	6	Nuclear	1.4
XP_006240862	564357861	Itga7	PREDICTED: integrin alpha-7 isoform X1	typeII_membrane	4	Cytoplasmic	1.451
XP_008763266	672057559	Itga7	PREDICTED: integrin alpha-7 isoform X2	typeII_membrane	3	Cytoplasmic	1.356
NP_110469	57528941	Itga7	integrin alpha-7 precursor	multi-pass_membrane	4	Cytoplasmic	1.434
XP_006224695	564302444	Itgav	PREDICTED: integrin alpha-V isoform X1	typeI_membrane	6	PlasmaMembrane	1.735
XP_008760222	672046176	Itgav	PREDICTED: LOW QUALITY PROTEIN: integrin alpha-V isoform X2	typeI_membrane	5	PlasmaMembrane	1.436
NP_671480	158517933	Itgb5	integrin beta-5 precursor	typeI_membrane	5	Extracellular	3.705
XP_006240759	564357619	Itgb8	PREDICTED: integrin beta-8 isoform X1	typeI_membrane	5	Extracellular	4.098
NP_001102196	157817947	Itgb8	integrin beta-8	typeII_membrane	4	Extracellular	3.211
XP_008771857	672088982	L1cam	PREDICTED: neural cell adhesion molecule L1 isoform X1	typeI_membrane	18	Nuclear	1.637
XP_008771858	672088984	L1cam	PREDICTED: neural cell adhesion molecule L1 isoform X2	typeI_membrane	18	Nuclear	1.663
XP_008771859	672088986	L1cam	PREDICTED: neural cell adhesion molecule L1 isoform X3	typeI_membrane	18	Nuclear	1.593
NP_059041	8393820	L1cam	neural cell adhesion molecule L1 precursor	typeI_membrane	16	Nuclear	1.471
NP_071562	31543514	Lgmn	legumain precursor	soluble_secreted	5	Extracellular	1.707
XP_008764492	672062026	Lingo1	PREDICTED: leucine-rich repeat and immunoglobulin-like domain-containing nogo receptor-interacting protein 1 isoform X1	typeI_membrane	8	PlasmaMembrane	2.447
XP_006243182	564363844	Lingo1	PREDICTED: leucine-rich repeat and immunoglobulin-like domain-containing nogo receptor-interacting protein 1 isoform X1	typeI_membrane	8	PlasmaMembrane	2.447
XP_008764493	672062029	Lingo1	PREDICTED: leucine-rich repeat and immunoglobulin-like domain-containing nogo receptor-interacting protein 1 isoform X1	typeI_membrane	8	PlasmaMembrane	2.447
XP_006243183	564363846	Lingo1	PREDICTED: leucine-rich repeat and immunoglobulin-like domain-containing nogo receptor-interacting protein 1 isoform X1	typeI_membrane	8	PlasmaMembrane	2.447
NP_001094192	213688408	Lingo1	leucine-rich repeat and immunoglobulin-like domain-containing nogo receptor-interacting protein 1 precursor	typeI_membrane	8	PlasmaMembrane	2.457
NP_001101396	157817446	Lingo2	leucine-rich repeat and immunoglobulin-like domain-containing nogo receptor-interacting protein 2 precursor	typeI_membrane	8	PlasmaMembrane	1.891
NP_631928	51036677	Lmbrd1	probable lysosomal cobalamin transporter	multi-pass_membrane	6	PlasmaMembrane	4.945
NP_001073408	121583776	Lmf2	lipase maturation factor 2	multi-pass_membrane	2	PlasmaMembrane	3.926
XP_008756520	672033703	LOC100365176	PREDICTED: RT1 class I histocompatibility antigen, AA alpha chain-like, partial	typeII_membrane	0	Cytoplasmic	1.082
XP_003752148	392355834	LOC100909548	PREDICTED: cation-dependent mannose-6-phosphate receptor	typeI_membrane	5	PlasmaMembrane	1.713
XP_006257263	564399895	LOC100909548	PREDICTED: cation-dependent mannose-6-phosphate receptor	typeI_membrane	5	PlasmaMembrane	1.713
XP_006257264	564399897	LOC100909548	PREDICTED: cation-dependent mannose-6-phosphate receptor	typeI_membrane	5	PlasmaMembrane	1.713
XP_008771999	672089498	LOC100909799	PREDICTED: ADP/ATP translocase 3	multi-pass_membrane	0	Mitochondrial	1.551
XP_003749363	672042833	LOC100910284	PREDICTED: brevican core protein-like, partial	soluble_intracellular	0	Extracellular	2.217
XP_008771011	672085904	LOC102546968	PREDICTED: LOW QUALITY PROTEIN: H-2 class I histocompatibility antigen, Q9 alpha chain-like isoform X2	typeII_membrane	2	Mitochondrial	1.74
XP_006247307	672069435	LOC102552659	PREDICTED: receptor tyrosine-protein kinase erbB-2-like, partial	typeII_membrane	1	Nuclear	2.304
XP_008756464	672033463	LOC102557454	PREDICTED: LOW QUALITY PROTEIN: RT1 class I histocompatibility antigen, AA alpha chain-like	typeI_membrane	1	Extracellular	1.388
XP_006252832	564388266	LOC103690098	PREDICTED: glutamate receptor ionotropic, delta-1-like	typeII_membrane	1	Nuclear	1.813
XP_008756548	672032965	LOC103690329	PREDICTED: G-protein coupled receptor 56-like	typeI_membrane	2	Extracellular	2.617
XP_008761308	672050277	LOC103692171	PREDICTED: mannosyl-oligosaccharide glucosidase	typeII_membrane	1	Mitochondrial	1.554
XP_008771770	672088626	LOC103694513	PREDICTED: teneurin-1-like	soluble_intracellular	0	Extracellular	2.621
XP_006227248	564324270	LOC683761	PREDICTED: RT1 class I histocompatibility antigen, AA alpha chain-like, partial	typeII_membrane	1	Cytoplasmic	2.14
XP_008772979	672014566	LOC689073	PREDICTED: LOW QUALITY PROTEIN: ADP/ATP translocase 2-like	multi-pass_membrane	0	PlasmaMembrane	1.898
XP_008758415	672039583	LOC689073	PREDICTED: LOW QUALITY PROTEIN: ADP/ATP translocase 2-like	multi-pass_membrane	0	PlasmaMembrane	1.898
XP_008768190	672075590	Lphn3	PREDICTED: latrophilin-3 isoform X1	multi-pass_membrane	5	PlasmaMembrane	3.508
XP_008768191	672075592	Lphn3	PREDICTED: latrophilin-3 isoform X2	multi-pass_membrane	5	PlasmaMembrane	3.499
XP_008768192	672075594	Lphn3	PREDICTED: latrophilin-3 isoform X3	multi-pass_membrane	5	PlasmaMembrane	3.49
XP_008768193	672075596	Lphn3	PREDICTED: latrophilin-3 isoform X4	multi-pass_membrane	5	PlasmaMembrane	3.508
XP_008768194	672075598	Lphn3	PREDICTED: latrophilin-3 isoform X5	multi-pass_membrane	5	PlasmaMembrane	3.577
XP_008768195	672075600	Lphn3	PREDICTED: latrophilin-3 isoform X6	multi-pass_membrane	5	PlasmaMembrane	3.514
XP_008768196	672075602	Lphn3	PREDICTED: latrophilin-3 isoform X7	multi-pass_membrane	5	PlasmaMembrane	3.485
XP_008768197	672075604	Lphn3	PREDICTED: latrophilin-3 isoform X8	multi-pass_membrane	5	PlasmaMembrane	3.54
XP_008768198	672075606	Lphn3	PREDICTED: latrophilin-3 isoform X9	multi-pass_membrane	5	PlasmaMembrane	3.591
XP_008768199	672075608	Lphn3	PREDICTED: latrophilin-3 isoform X10	multi-pass_membrane	6	PlasmaMembrane	3.995
XP_008768200	672075610	Lphn3	PREDICTED: latrophilin-3 isoform X11	multi-pass_membrane	5	PlasmaMembrane	3.63
XP_008768201	672075612	Lphn3	PREDICTED: latrophilin-3 isoform X12	multi-pass_membrane	6	PlasmaMembrane	4.04
XP_008768202	672075614	Lphn3	PREDICTED: latrophilin-3 isoform X13	multi-pass_membrane	5	PlasmaMembrane	4.08
XP_008768203	672075616	Lphn3	PREDICTED: latrophilin-3 isoform X14	multi-pass_membrane	5	PlasmaMembrane	4.083
XP_008768204	672075618	Lphn3	PREDICTED: latrophilin-3 isoform X15	multi-pass_membrane	5	PlasmaMembrane	4.079
XP_008768205	672075620	Lphn3	PREDICTED: latrophilin-3 isoform X16	multi-pass_membrane	5	PlasmaMembrane	4.101
XP_008768206	672075622	Lphn3	PREDICTED: latrophilin-3 isoform X17	multi-pass_membrane	5	PlasmaMembrane	4.103
XP_008768207	672075624	Lphn3	PREDICTED: latrophilin-3 isoform X18	multi-pass_membrane	5	PlasmaMembrane	4.439
XP_008768208	672075626	Lphn3	PREDICTED: latrophilin-3 isoform X19	multi-pass_membrane	5	PlasmaMembrane	4.428
NP_001001508	325197225	Lppr4	lipid phosphate phosphatase-related protein type 4	multi-pass_membrane	5	Nuclear	1.796
XP_008757395	672035803	Lrfn1	PREDICTED: leucine-rich repeat and fibronectin type III domain-containing protein 1 isoform X1	typeI_membrane	3	PlasmaMembrane	3.554
XP_006228688	564327036	Lrfn1	PREDICTED: leucine-rich repeat and fibronectin type III domain-containing protein 1 isoform X1	typeI_membrane	3	PlasmaMembrane	3.554
XP_008757396	672035806	Lrfn1	PREDICTED: leucine-rich repeat and fibronectin type III domain-containing protein 1 isoform X1	typeI_membrane	3	PlasmaMembrane	3.554
XP_006228690	564327040	Lrfn1	PREDICTED: leucine-rich repeat and fibronectin type III domain-containing protein 1 isoform X1	typeI_membrane	3	PlasmaMembrane	3.554
XP_008757397	672035809	Lrfn1	PREDICTED: leucine-rich repeat and fibronectin type III domain-containing protein 1 isoform X1	typeI_membrane	3	PlasmaMembrane	3.554
NP_001121166	189163475	Lrfn1	leucine-rich repeat and fibronectin type III domain-containing protein 1 isoform 1 precursor	typeI_membrane	3	PlasmaMembrane	3.554
NP_001102380	157817516	Lrfn1	leucine-rich repeat and fibronectin type III domain-containing protein 1 isoform 2 precursor	soluble_secreted	3	Extracellular	1.426
XP_006244491	564367102	Lrfn2	PREDICTED: leucine-rich repeat and fibronectin type-III domain-containing protein 2 isoform X1	typeII_membrane	6	PlasmaMembrane	2.203
NP_001034788	161760638	Lrfn2	leucine-rich repeat and fibronectin type-III domain-containing protein 2 precursor	typeI_membrane	6	PlasmaMembrane	2.158
XP_006228833	564327378	Lrfn3	PREDICTED: leucine-rich repeat and fibronectin type-III domain-containing protein 3 isoform X1	typeI_membrane	5	PlasmaMembrane	2.492
NP_001100972	157819369	Lrfn3	leucine-rich repeat and fibronectin type-III domain-containing protein 3 precursor	typeI_membrane	5	PlasmaMembrane	2.492
XP_008762909	672056213	Lrfn5	PREDICTED: leucine-rich repeat and fibronectin type-III domain-containing protein 5 isoform X1	typeI_membrane	6	PlasmaMembrane	2.172
NP_001101494	157820049	Lrfn5	leucine-rich repeat and fibronectin type-III domain-containing protein 5 precursor	typeI_membrane	6	PlasmaMembrane	2.172
XP_008763615	672058769	Lrp1	PREDICTED: prolow-density lipoprotein receptor-related protein 1 isoform X1	soluble_secreted	22	Extracellular	3.044
NP_001123962	283837871	Lrp1	prolow-density lipoprotein receptor-related protein 1 precursor	soluble_secreted	22	Extracellular	3.041
NP_001101313	157821815	Lrp1b	low-density lipoprotein receptor-related protein 1B	soluble_intracellular	0	Extracellular	2.584
XP_006230788	564332118	Lrp5	PREDICTED: low-density lipoprotein receptor-related protein 5 isoform X1	typeI_membrane	6	Extracellular	1.959
NP_001099791	188536057	Lrp5	low-density lipoprotein receptor-related protein 5 precursor	typeI_membrane	6	Extracellular	1.851
NP_001101362	157823966	Lrp6	low-density lipoprotein receptor-related protein 6	soluble_intracellular	0	Cytoplasmic	1.512
XP_006237581	564349357	Lrp6	PREDICTED: low-density lipoprotein receptor-related protein 6 isoform X1	typeI_membrane	8	PlasmaMembrane	1.423
XP_008761469	672050874	M6pr	PREDICTED: cation-dependent mannose-6-phosphate receptor isoform X1	typeI_membrane	5	PlasmaMembrane	1.713
XP_008761470	672050876	M6pr	PREDICTED: cation-dependent mannose-6-phosphate receptor isoform X1	typeI_membrane	5	PlasmaMembrane	1.713
NP_001007701	56090485	M6pr	cation-dependent mannose-6-phosphate receptor precursor	typeI_membrane	5	PlasmaMembrane	1.713
XP_006228638	564326930	Map3k10	PREDICTED: mitogen-activated protein kinase kinase kinase 10 isoform X1	soluble_intracellular	0	Nuclear	2.43
NP_001178550	300798289	Map3k10	mitogen-activated protein kinase kinase kinase 10	soluble_intracellular	0	Nuclear	2.433
XP_006240365	564356552	Map3k9	PREDICTED: mitogen-activated protein kinase kinase kinase 9 isoform X1	soluble_intracellular	0	Nuclear	3.51
NP_001094342	403224991	Map3k9	mitogen-activated protein kinase kinase kinase 9	soluble_intracellular	0	Nuclear	3.445
NP_076473	77176452	Mcam	cell surface glycoprotein MUC18 isoform 1 precursor	typeI_membrane	6	Nuclear	2.212
NP_001029181	77176454	Mcam	cell surface glycoprotein MUC18 isoform 2 precursor	typeI_membrane	6	Nuclear	1.757
NP_001099868	157822793	Mcu	calcium uniporter protein, mitochondrial precursor	multi-pass_membrane	0	Mitochondrial	2.396
XP_008762910	672056216	Mdga2	PREDICTED: MAM domain-containing glycosylphosphatidylinositol anchor protein 2 isoform X1	typeII_membrane	6	PlasmaMembrane	1.644
NP_954890	40538872	Mdga2	MAM domain-containing glycosylphosphatidylinositol anchor protein 2 precursor	typeI_membrane	8	PlasmaMembrane	1.701
XP_006239071	564353172	Mecr	PREDICTED: trans-2-enoyl-CoA reductase, mitochondrial isoform X1	soluble_intracellular	0	Mitochondrial	1.7
NP_058905	8393848	Mecr	trans-2-enoyl-CoA reductase, mitochondrial precursor	soluble_intracellular	0	Mitochondrial	2.778
XP_008759860	672044882	Med27	PREDICTED: mediator of RNA polymerase II transcription subunit 27 isoform X1	soluble_intracellular	0	Extracellular	1.654
XP_008759861	672044885	Med27	PREDICTED: mediator of RNA polymerase II transcription subunit 27 isoform X3	soluble_intracellular	0	Extracellular	1.953
NP_001100035	157818903	Med27	mediator of RNA polymerase II transcription subunit 27	soluble_intracellular	0	Extracellular	1.588
NP_001035276	93277126	Mfge8	lactadherin isoform 1 precursor	soluble_secreted	2	Extracellular	2.954
NP_036943	6981200	Mfge8	lactadherin isoform 2 precursor	soluble_secreted	2	Extracellular	3.484
NP_001019438	66730376	MGC109340	signal peptidase complex subunit 3	typeII_membrane	0	PlasmaMembrane	2.022
NP_071514	11559935	Myo5a	unconventional myosin-Va	soluble_intracellular	0	Nuclear	3.402
XP_006242149	564361198	Naga	PREDICTED: alpha-N-acetylgalactosaminidase isoform X1	soluble_secreted	4	Lysosomal	2.732
XP_006242150	564361200	Naga	PREDICTED: alpha-N-acetylgalactosaminidase isoform X1	soluble_secreted	4	Lysosomal	2.732
NP_001012120	58865810	Naga	alpha-N-acetylgalactosaminidase precursor	soluble_secreted	4	Lysosomal	2.732
NP_981954	42821116	Ncam2	neural cell adhesion molecule 2 precursor	typeI_membrane	5	Cytoplasmic	2.211
NP_001120996	189011606	Nceh1	neutral cholesterol ester hydrolase 1	typeII_membrane	1	PlasmaMembrane	1.711
NP_067714	11067409	Negr1	neuronal growth regulator 1 precursor	soluble_secreted	5	Extracellular	4.099
XP_008774970	672022994	Neo1	PREDICTED: neogenin, partial	multi-pass_membrane	8	Nuclear	2.193
XP_008764654	672062665	Neo1	PREDICTED: neogenin, partial	multi-pass_membrane	8	Nuclear	2.193
XP_008767628	672073585	Nfasc	PREDICTED: neurofascin isoform X1	typeI_membrane	11	Nuclear	1.782
XP_008767629	672073587	Nfasc	PREDICTED: neurofascin isoform X2	typeI_membrane	11	Nuclear	1.722
XP_006249789	564380416	Nfasc	PREDICTED: neurofascin isoform X3	typeII_membrane	11	Nuclear	1.783
XP_008767630	672073590	Nfasc	PREDICTED: neurofascin isoform X4	typeI_membrane	11	Nuclear	1.773
XP_008767631	672073592	Nfasc	PREDICTED: neurofascin isoform X5	typeI_membrane	11	Nuclear	1.672
XP_008767632	672073594	Nfasc	PREDICTED: neurofascin isoform X6	typeI_membrane	11	Nuclear	1.579
XP_008767633	672073596	Nfasc	PREDICTED: neurofascin isoform X7	typeI_membrane	9	Nuclear	1.928
XP_008767634	672073598	Nfasc	PREDICTED: neurofascin isoform X8	typeI_membrane	11	Nuclear	1.664
XP_008767635	672073600	Nfasc	PREDICTED: neurofascin isoform X9	typeI_membrane	11	Nuclear	1.595
XP_006249796	564380430	Nfasc	PREDICTED: neurofascin isoform X10	typeII_membrane	11	Nuclear	1.566
XP_008767636	672073603	Nfasc	PREDICTED: neurofascin isoform X11	typeI_membrane	9	Nuclear	2.186
XP_008767637	672073605	Nfasc	PREDICTED: neurofascin isoform X12	typeI_membrane	9	Nuclear	2.21
XP_008767638	672073607	Nfasc	PREDICTED: neurofascin isoform X13	typeI_membrane	9	Nuclear	2.116
XP_008767639	672073609	Nfasc	PREDICTED: neurofascin isoform X14	typeI_membrane	9	Nuclear	2.069
XP_008767640	672073611	Nfasc	PREDICTED: neurofascin isoform X15	typeI_membrane	9	Nuclear	2.051
XP_006249800	564380438	Nfasc	PREDICTED: neurofascin isoform X16	typeII_membrane	9	Nuclear	2.156
XP_008767641	672073614	Nfasc	PREDICTED: neurofascin isoform X17	typeI_membrane	9	Nuclear	1.981
XP_006249803	564380444	Nfasc	PREDICTED: neurofascin isoform X18	multi-pass_membrane	11	Nuclear	2.278
XP_006249804	564380446	Nfasc	PREDICTED: neurofascin isoform X18	multi-pass_membrane	11	Nuclear	2.278
NP_001153785	237858625	Nfasc	neurofascin isoform 2 precursor	multi-pass_membrane	8	Nuclear	2.675
NP_001153787	237858627	Nfasc	neurofascin isoform 4 precursor	multi-pass_membrane	8	Nuclear	2.536
NP_446361	19924211	Nfasc	neurofascin isoform 3 precursor	multi-pass_membrane	8	Nuclear	2.613
NP_001153786	237858623	Nfasc	neurofascin isoform 1 precursor	multi-pass_membrane	10	Nuclear	2.026
XP_006229170	564328178	Nomo1	PREDICTED: nodal modulator 1 isoform X1	soluble_secreted	5	PlasmaMembrane	1.631
NP_001101954	157816949	Nomo1	nodal modulator 1 precursor	soluble_secreted	5	PlasmaMembrane	1.514
XP_008764552	672062216	Nptn	PREDICTED: neuroplastin isoform X3	typeI_membrane	5	Extracellular	1.695
NP_062253	9507073	Nptn	neuroplastin precursor	typeI_membrane	5	Nuclear	1.739
NP_714957	24308510	Nptx1	neuronal pentraxin-1 precursor	soluble_secreted	2	Cytoplasmic	1.273
NP_110468	36054040	Nptxr	neuronal pentraxin receptor	typeII_membrane	3	Cytoplasmic	1.264
NP_068535	37620151	Nrxn1	neurexin 1 precursor	typeI_membrane	5	Nuclear	1.384
XP_008762953	672056413	Nrxn3	PREDICTED: neurexin-3 isoform X1	typeII_membrane	5	Nuclear	1.35
XP_008762954	672056415	Nrxn3	PREDICTED: neurexin-3 isoform X2	typeI_membrane	3	PlasmaMembrane	1.619
XP_008762955	672056417	Nrxn3	PREDICTED: neurexin-3 isoform X3	typeI_membrane	3	Nuclear	1.408
NP_446269	168823431	Nrxn3	neurexin-3 precursor	typeII_membrane	4	Nuclear	1.417
XP_006232808	564337381	Ntrk1	PREDICTED: high affinity nerve growth factor receptor isoform X1	soluble_secreted	10	Extracellular	1.443
NP_067600	11024666	Ntrk1	high affinity nerve growth factor receptor precursor	soluble_secreted	10	Extracellular	1.399
XP_008769647	672080847	Ntrk2	PREDICTED: BDNF/NT-3 growth factors receptor isoform X1	multi-pass_membrane	1	Extracellular	1.424
XP_008769648	672080849	Ntrk2	PREDICTED: BDNF/NT-3 growth factors receptor isoform X1	multi-pass_membrane	1	Extracellular	1.424
XP_006253569	564390166	Ntrk2	PREDICTED: BDNF/NT-3 growth factors receptor isoform X2	typeI_membrane	9	Extracellular	2.308
XP_008769649	672080852	Ntrk2	PREDICTED: BDNF/NT-3 growth factors receptor isoform X3	typeI_membrane	9	Extracellular	1.899
NP_036863	6981294	Ntrk2	BDNF/NT-3 growth factors receptor isoform 1 precursor	multi-pass_membrane	1	Extracellular	1.382
NP_062121	9506939	Ntrk3	NT-3 growth factor receptor isoform 3 precursor	multi-pass_membrane	0	PlasmaMembrane	1.647
NP_001257584	397174820	Ntrk3	NT-3 growth factor receptor isoform 2 precursor	multi-pass_membrane	1	PlasmaMembrane	1.593
NP_001257585	397174822	Ntrk3	NT-3 growth factor receptor isoform 1 precursor	multi-pass_membrane	0	PlasmaMembrane	1.524
XP_006236983	564347908	Nup210	PREDICTED: nuclear pore membrane glycoprotein 210 isoform X1	typeII_membrane	11	PlasmaMembrane	1.691
NP_445774	16758020	Nup210	nuclear pore membrane glycoprotein 210 precursor	typeI_membrane	12	PlasmaMembrane	1.841
NP_665720	21955259	Olfm3	noelin-3 precursor	soluble_secreted	5	Nuclear	1.312
NP_001005898	226874871	Omg	oligodendrocyte-myelin glycoprotein precursor	typeI_membrane	6	Extracellular	3.085
XP_006256487	564397875	P4ha1	PREDICTED: prolyl 4-hydroxylase subunit alpha-1 isoform X2	soluble_secreted	2	Cytoplasmic	2.077
XP_006256486	564397873	P4ha1	PREDICTED: prolyl 4-hydroxylase subunit alpha-1 isoform X1	soluble_secreted	2	ER	2.106
NP_742059	51036657	P4ha1	prolyl 4-hydroxylase subunit alpha-1 precursor	soluble_secreted	2	ER	2.106
XP_001075237	564310639	P4htm	PREDICTED: transmembrane prolyl 4-hydroxylase	typeII_membrane	2	Mitochondrial	1.4
XP_217285	564365719	P4htm	PREDICTED: transmembrane prolyl 4-hydroxylase	typeII_membrane	2	Mitochondrial	1.4
XP_006252439	564387229	Pcdh17	PREDICTED: protocadherin-17 isoform X1	soluble_secreted	12	Nuclear	3.188
XP_006252440	564387231	Pcdh17	PREDICTED: protocadherin-17 isoform X2	soluble_secreted	12	Nuclear	3.151
XP_006252441	564387233	Pcdh17	PREDICTED: protocadherin-17 isoform X3	soluble_secreted	12	Nuclear	3.117
XP_006252443	564387237	Pcdh17	PREDICTED: protocadherin-17 isoform X4	typeI_membrane	8	Nuclear	2.762
NP_001100749	157822363	Pcdh17	protocadherin-17 precursor	soluble_secreted	12	Nuclear	3.494
XP_006251079	564383807	Pcdh7	PREDICTED: protocadherin-7 isoform X1	multi-pass_membrane	7	Nuclear	3.452
XP_008768411	672076333	Pcdh7	PREDICTED: protocadherin-7 isoform X2	multi-pass_membrane	6	Nuclear	2.852
XP_006251084	564383817	Pcdh7	PREDICTED: protocadherin-7 isoform X3	multi-pass_membrane	6	Nuclear	2.929
XP_006251085	564383819	Pcdh7	PREDICTED: protocadherin-7 isoform X4	multi-pass_membrane	6	Nuclear	2.728
NP_001004087	51854233	Pcdh7	protocadherin-7 precursor	multi-pass_membrane	7	Nuclear	3.387
NP_036878	6981342	Pcsk2	neuroendocrine convertase 2 precursor	soluble_secreted	3	Cytoplasmic	1.313
NP_659553	21489987	Pcyox1	prenylcysteine oxidase precursor	soluble_secreted	3	PlasmaMembrane	2.42
XP_006254868	564393676	Pcyox1l	PREDICTED: prenylcysteine oxidase-like isoform X1	soluble_intracellular	0	PlasmaMembrane	2.021
NP_001128014	197384556	Pcyox1l	prenylcysteine oxidase-like precursor	soluble_secreted	5	PlasmaMembrane	2.476
NP_973719	42538976	Pgap1	GPI inositol-deacylase	multi-pass_membrane	4	PlasmaMembrane	4.658
NP_001006602	54633340	Pigs	GPI transamidase component PIG-S	multi-pass_membrane	2	PlasmaMembrane	1.428
XP_006235594	564344291	Pigt	PREDICTED: GPI transamidase component PIG-T isoform X1	multi-pass_membrane	2	Lysosomal	2.143
NP_001100010	164663843	Pigt	GPI transamidase component PIG-T precursor	typeI_membrane	2	Lysosomal	2.454
NP_446279	400153797	Plod1	procollagen-lysine,2-oxoglutarate 5-dioxygenase 1 precursor	soluble_secreted	4	Cytoplasmic	2.037
XP_001072622	564304046	Plxna1	PREDICTED: plexin-A1 isoform X1	typeII_membrane	12	Nuclear	2.101
XP_002729444	392347490	Plxna1	PREDICTED: plexin-A1 isoform X2	typeI_membrane	12	Nuclear	2.026
NP_001099458	310688889	Plxna2	plexin-A2	typeI_membrane	15	PlasmaMembrane	1.697
XP_008771820	672088848	Plxna3	PREDICTED: plexin-A3 isoform X2	typeII_membrane	8	Extracellular	1.628
XP_008771821	672088850	Plxna3	PREDICTED: plexin-A3 isoform X3	typeII_membrane	7	Extracellular	1.642
XP_006229640	564329410	Plxna3	PREDICTED: plexin-A3 isoform X1	typeI_membrane	8	Nuclear	1.533
XP_006229639	564329408	Plxna3	PREDICTED: plexin-A3 isoform X1	typeI_membrane	8	Nuclear	1.533
NP_001101051	164518900	Plxna3	plexin-A3 precursor	typeI_membrane	8	Nuclear	1.533
XP_008773939	672018245	Plxna4a	PREDICTED: plexin-A4	typeII_membrane	8	Nuclear	2.584
XP_008761081	672049453	Plxna4a	PREDICTED: plexin-A4	typeII_membrane	8	Nuclear	2.584
XP_006226101	564308472	Plxnc1	PREDICTED: plexin-C1 isoform X1	multi-pass_membrane	20	PlasmaMembrane	1.892
XP_008763544	672058561	Plxnc1	PREDICTED: plexin-C1 isoform X2	multi-pass_membrane	22	PlasmaMembrane	2.131
XP_006256361	564397476	Pofut2	PREDICTED: GDP-fucose protein O-fucosyltransferase 2 isoform X1	soluble_intracellular	0	Mitochondrial	3.067
NP_001101091	164518932	Pofut2	GDP-fucose protein O-fucosyltransferase 2 precursor	soluble_secreted	2	Cytoplasmic	2.898
NP_001094122	281332155	Poglut1	protein O-glucosyltransferase 1 precursor	soluble_secreted	3	Mitochondrial	1.631
NP_001009437	57222294	Pomgnt2	protein O-linked-mannose beta-1,4-N-acetylglucosaminyltransferase 2 precursor	soluble_secreted	2	Mitochondrial	1.608
XP_008764903	672063612	Pomgnt2	PREDICTED: protein O-linked-mannose beta-1,4-N-acetylglucosaminyltransferase 2 isoform X1	soluble_secreted	2	Mitochondrial	1.608
XP_008764904	672063614	Pomgnt2	PREDICTED: protein O-linked-mannose beta-1,4-N-acetylglucosaminyltransferase 2 isoform X1	soluble_secreted	2	Mitochondrial	1.608
XP_008764905	672063616	Pomgnt2	PREDICTED: protein O-linked-mannose beta-1,4-N-acetylglucosaminyltransferase 2 isoform X1	soluble_secreted	2	Mitochondrial	1.608
XP_008760921	672048833	Pon2	PREDICTED: serum paraoxonase/arylesterase 2 isoform X1	typeII_membrane	2	Mitochondrial	2.512
NP_001013100	61556888	Pon2	serum paraoxonase/arylesterase 2	soluble_intracellular	0	Cytoplasmic	1.511
NP_001099751	166064014	Prcp	lysosomal Pro-X carboxypeptidase precursor	soluble_secreted	4	Lysosomal	3.574
NP_062116	9507007	Ptgfrn	prostaglandin F2 receptor negative regulator precursor	typeI_membrane	5	Nuclear	1.184
XP_006238739	564352382	Ptprf	PREDICTED: receptor-type tyrosine-protein phosphatase F isoform X1	typeII_membrane	6	Nuclear	1.764
XP_006238740	564352384	Ptprf	PREDICTED: receptor-type tyrosine-protein phosphatase F isoform X2	typeII_membrane	6	Nuclear	1.738
XP_006238742	564352388	Ptprf	PREDICTED: receptor-type tyrosine-protein phosphatase F isoform X3	typeII_membrane	6	Nuclear	1.661
XP_006238743	564352390	Ptprf	PREDICTED: receptor-type tyrosine-protein phosphatase F isoform X4	typeII_membrane	6	Nuclear	1.645
NP_062122	9507013	Ptprf	receptor-type tyrosine-protein phosphatase F precursor	typeI_membrane	6	Nuclear	1.552
NP_599183	29789369	Ptprg	receptor-type tyrosine-protein phosphatase gamma	typeII_membrane	5	Nuclear	1.669
XP_008765644	672066323	Ptprm	PREDICTED: receptor-type tyrosine-protein phosphatase mu isoform X1, partial	typeII_membrane	7	Nuclear	1.687
NP_001162103	274323760	Ptprm	receptor-type tyrosine-protein phosphatase mu precursor	typeI_membrane	10	PlasmaMembrane	1.403
XP_006236199	564345936	Ptprz1	PREDICTED: receptor-type tyrosine-protein phosphatase zeta isoform X1	typeI_membrane	16	Nuclear	3.218
XP_006236200	564345938	Ptprz1	PREDICTED: receptor-type tyrosine-protein phosphatase zeta isoform X2	typeI_membrane	11	Nuclear	2.219
XP_006236201	564345940	Ptprz1	PREDICTED: receptor-type tyrosine-protein phosphatase zeta isoform X3	typeI_membrane	11	Nuclear	2.228
NP_037212	283046651	Ptprz1	receptor-type tyrosine-protein phosphatase zeta isoform 1 precursor	typeI_membrane	16	Nuclear	3.23
NP_001164156	283046647	Ptprz1	receptor-type tyrosine-protein phosphatase zeta isoform 2 precursor	soluble_secreted	16	Nuclear	3.298
NP_059055	61889071	Rab10	ras-related protein Rab-10	soluble_intracellular	0	Cytoplasmic	2.924
XP_006234111	564340557	Rab14	PREDICTED: ras-related protein Rab-14 isoform X1	soluble_intracellular	0	Cytoplasmic	2.184
XP_006234112	564340559	Rab14	PREDICTED: ras-related protein Rab-14 isoform X1	soluble_intracellular	0	Cytoplasmic	2.184
NP_446041	16758368	Rab14	ras-related protein Rab-14	soluble_intracellular	0	Cytoplasmic	2.189
XP_008758941	672041398	Rab3c	PREDICTED: ras-related protein Rab-3C isoform X1	soluble_intracellular	0	Cytoplasmic	1.549
NP_598220	19424194	Rab3c	ras-related protein Rab-3C	soluble_intracellular	0	Cytoplasmic	1.641
XP_006235935	564345236	Reln	PREDICTED: reelin isoform X1	typeI_membrane	14	Extracellular	2.271
NP_536319	31543579	Reln	reelin precursor	typeI_membrane	14	Extracellular	2.247
XP_006222868	564321746	RGD1306091	PREDICTED: mitogen-activated protein kinase kinase kinase MLK4 isoform X1	soluble_intracellular	0	Nuclear	3.515
XP_008770896	672085451	RGD1306091	PREDICTED: LOW QUALITY PROTEIN: mitogen-activated protein kinase kinase kinase MLK4 isoform X2	soluble_intracellular	0	Nuclear	3.665
XP_008761620	672051431	RGD1306151	PREDICTED: uncharacterized protein KIAA1467 homolog isoform X1	typeII_membrane	4	PlasmaMembrane	1.562
XP_008761621	672051433	RGD1306151	PREDICTED: uncharacterized protein KIAA1467 homolog isoform X2	typeII_membrane	4	PlasmaMembrane	1.266
XP_006237594	564349386	RGD1306151	PREDICTED: uncharacterized protein KIAA1467 homolog isoform X3	typeII_membrane	5	PlasmaMembrane	1.557
XP_008761859	672052313	RGD1309821	PREDICTED: uncharacterized family 31 glucosidase KIAA1161 homolog isoform X1	typeII_membrane	5	PlasmaMembrane	1.11
XP_006238156	564350865	RGD1309821	PREDICTED: uncharacterized family 31 glucosidase KIAA1161 homolog isoform X1	typeII_membrane	5	PlasmaMembrane	1.11
NP_001102441	157822809	RGD1309821	uncharacterized family 31 glucosidase KIAA1161 homolog	typeII_membrane	5	PlasmaMembrane	1.11
XP_008766755	672070410	Robo1	PREDICTED: roundabout homolog 1 isoform X1	soluble_intracellular	0	Nuclear	3.756
XP_008766756	672070412	Robo1	PREDICTED: roundabout homolog 1 isoform X2	soluble_intracellular	0	Nuclear	3.748
XP_008766757	672070414	Robo1	PREDICTED: roundabout homolog 1 isoform X3	soluble_intracellular	0	Nuclear	3.765
XP_008766758	672070416	Robo1	PREDICTED: roundabout homolog 1 isoform X4	soluble_intracellular	0	Nuclear	3.803
NP_071524	11559953	Robo1	roundabout homolog 1 precursor	soluble_secreted	12	Nuclear	3.794
XP_008766759	672070418	Robo2	PREDICTED: roundabout homolog 2 isoform X1	soluble_intracellular	0	Nuclear	3.646
XP_008766760	672070420	Robo2	PREDICTED: roundabout homolog 2 isoform X2	typeII_membrane	5	Nuclear	3.499
XP_008766761	672070422	Robo2	PREDICTED: roundabout homolog 2 isoform X3	typeII_membrane	5	Nuclear	3.472
NP_115289	281332151	Robo2	roundabout homolog 2 precursor	typeI_membrane	6	Nuclear	3.751
XP_006249439	564379463	Rpl6	PREDICTED: 60S ribosomal protein L6 isoform X2	soluble_intracellular	0	Nuclear	2.828
XP_006249440	564379465	Rpl6	PREDICTED: 60S ribosomal protein L6 isoform X1	soluble_intracellular	0	Nuclear	2.859
NP_446423	162287391	Rpl6	60S ribosomal protein L6	soluble_intracellular	0	Nuclear	2.859
NP_037199	752993193	Rpn1	dolichyl-diphosphooligosaccharide--protein glycosyltransferase subunit 1 precursor	typeI_membrane	2	Cytoplasmic	0.976
NP_001128173	197927431	RT1-A	RT1 class I, locus A precursor	typeI_membrane	2	Cytoplasmic	1.401
XP_006256161	564397024	RT1-A1	PREDICTED: RT1 class Ia, locus A1 isoform X1	typeI_membrane	2	Extracellular	1.227
NP_001008827	57012424	RT1-A1	RT1 class Ia, locus A1 precursor	typeI_membrane	2	Extracellular	1.259
NP_001008829	57012342	RT1-A2	RT1 class Ia, locus A2 precursor	typeI_membrane	2	Extracellular	1.606
XP_006255909	564396450	RT1-CE10	PREDICTED: RT1 class I, locus CE10 isoform X2	typeI_membrane	2	Mitochondrial	1.62
NP_001008833	57012420	RT1-CE10	RT1 class I, locus CE10 precursor	typeI_membrane	2	Mitochondrial	1.496
NP_001008836	57012416	RT1-CE13	RT1 class I, locus CE13 precursor	typeI_membrane	2	Extracellular	1.477
NP_001029157	77404172	RT1-CE14	RT1 class I, locus CE14 isoform 2	typeI_membrane	2	Cytoplasmic	1.852
NP_001008837	57012384	RT1-CE14	RT1 class I, locus CE14 isoform 1 precursor	typeI_membrane	2	Cytoplasmic	1.823
NP_001008839	57012426	RT1-CE16	RT1 class I, locus CE16 precursor	typeI_membrane	2	PlasmaMembrane	0.977
NP_001008840	57012402	RT1-CE2	RT1 class I, locus CE2 precursor	typeI_membrane	2	Extracellular	1.333
NP_001008843	57114336	RT1-CE5	RT1 class I, locus CE5 isoform 1 precursor	typeI_membrane	2	Mitochondrial	1.127
NP_001029158	77404174	RT1-CE5	RT1 class I, locus CE5 isoform 2 precursor	typeI_membrane	2	PlasmaMembrane	1.146
XP_008756523	672033708	RT1-Cl	PREDICTED: LOW QUALITY PROTEIN: RT1 class Ib, locus Cl, partial	typeII_membrane	1	Mitochondrial	1.293
NP_996730	47777291	RT1-Cl	RT1 class Ib, locus Cl precursor	typeI_membrane	2	Extracellular	1.537
XP_006227252	564324069	RT1-EC2	PREDICTED: class I histocompatibility antigen, Non-RT1.A alpha-1 chain, partial	typeII_membrane	1	Cytoplasmic	1.659
NP_036777	6981494	RT1-EC2	class I histocompatibility antigen, Non-RT1.A alpha-1 chain precursor	soluble_secreted	2	Extracellular	2.487
NP_036778	6981492	RT1-N1	RT1 class Ib, locus N1 precursor	multi-pass_membrane	2	Extracellular	2.461
XP_006256000	564396658	RT1-N2	PREDICTED: RT1 class Ib, locus N2 isoform X1	multi-pass_membrane	2	Extracellular	1.843
NP_001008854	113865837	RT1-N2	RT1 class Ib, locus N2 precursor	multi-pass_membrane	2	Extracellular	1.843
XP_006255970	564396598	RT1-N3	PREDICTED: RT1 class Ib, locus N3 isoform X1	multi-pass_membrane	2	Cytoplasmic	2.253
XP_006255971	564396600	RT1-N3	PREDICTED: RT1 class Ib, locus N3 isoform X2	multi-pass_membrane	2	Extracellular	1.558
NP_001008855	57012390	RT1-N3	RT1 class Ib, locus N3	multi-pass_membrane	2	Extracellular	1.888
XP_008770970	672085757	RT1-T24-3	PREDICTED: RT1 class I, locus T24, gene 3 isoform X2	soluble_secreted	3	Extracellular	3.13
XP_008770971	672085761	RT1-T24-3	PREDICTED: RT1 class I, locus T24, gene 3 isoform X2	soluble_secreted	3	Extracellular	3.13
XP_008770972	672085765	RT1-T24-3	PREDICTED: RT1 class I, locus T24, gene 3 isoform X3	soluble_intracellular	0	Extracellular	2.469
XP_008770973	672085767	RT1-T24-3	PREDICTED: RT1 class I, locus T24, gene 3 isoform X3	soluble_intracellular	0	Extracellular	2.469
XP_008770974	672085769	RT1-T24-3	PREDICTED: RT1 class I, locus T24, gene 3 isoform X1	soluble_secreted	3	Extracellular	3.926
XP_008770975	672085771	RT1-T24-3	PREDICTED: RT1 class I, locus T24, gene 3 isoform X4	soluble_secreted	1	Extracellular	2.411
NP_001159875	261862309	RT1-T24-3	RT1 class I, locus T24, gene 3	soluble_secreted	3	Extracellular	3.926
NP_001008826	77404170	RT1-T24-4	RT1 class I, locus T24, gene 4	typeII_membrane	3	Extracellular	3.309
XP_008756524	672033710	Rt1.aa	PREDICTED: MHC class I RT1.Aa alpha-chain	soluble_intracellular	0	Cytoplasmic	3.209
NP_001094106	158749626	Scamp1	secretory carrier-associated membrane protein 1	multi-pass_membrane	0	PlasmaMembrane	4.326
NP_113729	13928730	Scarb1	scavenger receptor class B member 1	multi-pass_membrane	9	PlasmaMembrane	2.067
NP_001257974	402534527	Scn1b	sodium channel subunit beta-1 isoform 1 precursor	typeI_membrane	3	Extracellular	1.485
NP_058984	8394245	Scn1b	sodium channel subunit beta-1 isoform 1 precursor	typeI_membrane	3	Extracellular	1.485
NP_001257975	402534531	Scn1b	sodium channel subunit beta-1 isoform 2	typeII_membrane	3	Cytoplasmic	1.377
NP_036779	6981506	Scn2a	sodium channel protein type 2 subunit alpha	multi-pass_membrane	7	PlasmaMembrane	4.49
XP_008760136	672045844	Scn3a	PREDICTED: sodium channel protein type 3 subunit alpha isoform X2	multi-pass_membrane	6	PlasmaMembrane	4.722
XP_008760137	672045846	Scn3a	PREDICTED: sodium channel protein type 3 subunit alpha isoform X2	multi-pass_membrane	6	PlasmaMembrane	4.722
XP_008760138	672045848	Scn3a	PREDICTED: sodium channel protein type 3 subunit alpha isoform X3	multi-pass_membrane	6	PlasmaMembrane	4.718
XP_008760139	672045850	Scn3a	PREDICTED: sodium channel protein type 3 subunit alpha isoform X4	multi-pass_membrane	6	PlasmaMembrane	4.722
XP_008760140	672045852	Scn3a	PREDICTED: sodium channel protein type 3 subunit alpha isoform X5	multi-pass_membrane	6	PlasmaMembrane	4.755
XP_008760141	672045854	Scn3a	PREDICTED: sodium channel protein type 3 subunit alpha isoform X1	multi-pass_membrane	6	PlasmaMembrane	4.754
XP_008760142	672045856	Scn3a	PREDICTED: sodium channel protein type 3 subunit alpha isoform X6	multi-pass_membrane	6	PlasmaMembrane	4.753
NP_037251	6981510	Scn3a	sodium channel protein type 3 subunit alpha	multi-pass_membrane	6	PlasmaMembrane	4.76
XP_006247621	564374804	Scn4a	PREDICTED: sodium channel protein type 4 subunit alpha isoform X1	multi-pass_membrane	3	PlasmaMembrane	4.674
NP_037310	6981512	Scn4a	sodium channel protein type 4 subunit alpha	multi-pass_membrane	3	PlasmaMembrane	4.667
NP_579823	18959222	Scn9a	sodium channel protein type 9 subunit alpha	multi-pass_membrane	5	PlasmaMembrane	4.399
NP_596874	19173736	Scpep1	retinoid-inducible serine carboxypeptidase precursor	typeI_membrane	5	Lysosomal	1.593
NP_808794	158341666	Sel1l	protein sel-1 homolog 1 precursor	soluble_secreted	4	Cytoplasmic	1.761
XP_008759372	672042946	Sema4a	PREDICTED: semaphorin-4A isoform X1	typeI_membrane	3	PlasmaMembrane	1.545
XP_006232701	564337164	Sema4a	PREDICTED: semaphorin-4A isoform X1	typeI_membrane	3	PlasmaMembrane	1.545
XP_006232703	564337168	Sema4a	PREDICTED: semaphorin-4A isoform X1	typeI_membrane	3	PlasmaMembrane	1.545
XP_006232702	564337166	Sema4a	PREDICTED: semaphorin-4A isoform X1	typeI_membrane	3	PlasmaMembrane	1.545
NP_001012078	403224995	Sema4a	semaphorin-4A precursor	typeI_membrane	3	PlasmaMembrane	1.545
NP_001163933	281427160	Sema4b	semaphorin-4B precursor	typeI_membrane	7	Extracellular	2.011
NP_001164034	281604106	Sema4d	semaphorin-4D precursor	typeI_membrane	6	Extracellular	1.585
NP_062145	9507083	Sema4f	semaphorin-4F precursor	typeI_membrane	1	PlasmaMembrane	3.011
XP_006244410	564366913	Sema6b	PREDICTED: semaphorin-6B isoform X2	typeII_membrane	7	PlasmaMembrane	2.587
XP_006244411	564366915	Sema6b	PREDICTED: semaphorin-6B isoform X1	typeI_membrane	6	PlasmaMembrane	2.744
NP_445923	16758220	Sema6b	semaphorin-6B precursor	typeI_membrane	6	PlasmaMembrane	2.744
XP_008764495	672062037	Sema7a	PREDICTED: semaphorin-7A isoform X1	typeII_membrane	3	Nuclear	1.78
NP_001101623	209863068	Sema7a	semaphorin-7A precursor	typeI_membrane	4	Extracellular	2.358
NP_058869	8393057	Serpinh1	serpin H1 precursor	soluble_secreted	2	ER	4.087
NP_001102229	157817061	Siae	sialate O-acetylesterase precursor	soluble_secreted	8	Lysosomal	2.058
XP_006255544	564395504	Slc12a4	PREDICTED: solute carrier family 12 member 4 isoform X1	multi-pass_membrane	5	PlasmaMembrane	4.621
XP_008770714	672084811	Slc12a4	PREDICTED: solute carrier family 12 member 4 isoform X2	multi-pass_membrane	5	PlasmaMembrane	4.503
NP_062102	9507107	Slc12a4	solute carrier family 12 member 4	multi-pass_membrane	5	PlasmaMembrane	4.61
NP_599190	19705463	Slc12a5	solute carrier family 12 member 5	multi-pass_membrane	9	PlasmaMembrane	4.121
XP_006234772	564342248	Slc12a6	PREDICTED: solute carrier family 12 member 6 isoform X1	multi-pass_membrane	5	PlasmaMembrane	4.717
XP_006234773	564342250	Slc12a6	PREDICTED: solute carrier family 12 member 6 isoform X2	multi-pass_membrane	5	PlasmaMembrane	4.585
NP_001103100	157820121	Slc12a6	solute carrier family 12 member 6	multi-pass_membrane	5	PlasmaMembrane	4.704
XP_003753614	392338713	Slc25a31	PREDICTED: ADP/ATP translocase 4 isoform X1	multi-pass_membrane	0	PlasmaMembrane	2.052
XP_001069558	392345613	Slc25a31	PREDICTED: ADP/ATP translocase 4 isoform X2	multi-pass_membrane	0	PlasmaMembrane	1.37
NP_445967	32189355	Slc25a4	ADP/ATP translocase 1	multi-pass_membrane	0	Mitochondrial	1.97
NP_476443	32189350	Slc25a5	ADP/ATP translocase 2	multi-pass_membrane	1	Mitochondrial	1.558
NP_113970	13929106	Slc32a1	vesicular inhibitory amino acid transporter	multi-pass_membrane	2	PlasmaMembrane	4.898
XP_006235503	564344048	Slc32a1	PREDICTED: vesicular inhibitory amino acid transporter isoform X1	multi-pass_membrane	2	PlasmaMembrane	4.898
NP_062156	402743472	Slc3a2	4F2 cell-surface antigen heavy chain isoform 1	typeII_membrane	7	Cytoplasmic	1.678
NP_001258018	402743833	Slc3a2	4F2 cell-surface antigen heavy chain isoform 2	typeII_membrane	8	Extracellular	1.501
XP_006250850	564383189	Slc4a4	PREDICTED: electrogenic sodium bicarbonate cotransporter 1 isoform X1	multi-pass_membrane	3	PlasmaMembrane	3.51
XP_006250851	564383191	Slc4a4	PREDICTED: electrogenic sodium bicarbonate cotransporter 1 isoform X2	multi-pass_membrane	3	PlasmaMembrane	3.732
XP_006250852	564383193	Slc4a4	PREDICTED: electrogenic sodium bicarbonate cotransporter 1 isoform X3	multi-pass_membrane	3	PlasmaMembrane	3.346
XP_006250853	564383195	Slc4a4	PREDICTED: electrogenic sodium bicarbonate cotransporter 1 isoform X4	multi-pass_membrane	3	PlasmaMembrane	3.333
NP_445876	16758164	Slc4a4	electrogenic sodium bicarbonate cotransporter 1	multi-pass_membrane	3	PlasmaMembrane	3.615
NP_955791	41054850	Slc4a8	electroneutral sodium bicarbonate exchanger 1 isoform 1	multi-pass_membrane	1	PlasmaMembrane	3.64
NP_001257723	399124806	Slc4a8	electroneutral sodium bicarbonate exchanger 1 isoform 2	multi-pass_membrane	0	PlasmaMembrane	3.364
NP_001257724	399124804	Slc4a8	electroneutral sodium bicarbonate exchanger 1 isoform 3	multi-pass_membrane	0	PlasmaMembrane	3.33
XP_008759313	672042681	Slitrk3	PREDICTED: SLIT and NTRK-like protein 3 isoform X1	multi-pass_membrane	6	Nuclear	1.649
XP_006232552	564336816	Slitrk3	PREDICTED: SLIT and NTRK-like protein 3 isoform X1	multi-pass_membrane	6	Nuclear	1.649
NP_001101153	157818529	Slitrk3	SLIT and NTRK-like protein 3 precursor	multi-pass_membrane	6	Nuclear	1.649
XP_008773079	672014998	Sorcs1	PREDICTED: VPS10 domain-containing receptor SorCS1 isoform X1	multi-pass_membrane	7	PlasmaMembrane	1.546
XP_008773080	672015000	Sorcs1	PREDICTED: VPS10 domain-containing receptor SorCS1 isoform X2	typeII_membrane	7	PlasmaMembrane	1.741
XP_008773081	672015002	Sorcs1	PREDICTED: VPS10 domain-containing receptor SorCS1 isoform X3	typeI_membrane	7	PlasmaMembrane	1.431
XP_006231587	564334061	Sorcs1	PREDICTED: VPS10 domain-containing receptor SorCS1 isoform X4	typeI_membrane	8	PlasmaMembrane	1.608
XP_006231581	564334049	Sorcs1	PREDICTED: VPS10 domain-containing receptor SorCS1 isoform X5	typeI_membrane	8	PlasmaMembrane	1.856
XP_006231582	564334051	Sorcs1	PREDICTED: VPS10 domain-containing receptor SorCS1 isoform X6	typeI_membrane	8	PlasmaMembrane	1.919
XP_006231583	564334053	Sorcs1	PREDICTED: VPS10 domain-containing receptor SorCS1 isoform X7	typeI_membrane	8	PlasmaMembrane	1.684
XP_006231584	564334055	Sorcs1	PREDICTED: VPS10 domain-containing receptor SorCS1 isoform X8	typeI_membrane	8	PlasmaMembrane	1.79
XP_006231585	564334057	Sorcs1	PREDICTED: VPS10 domain-containing receptor SorCS1 isoform X9	typeI_membrane	8	PlasmaMembrane	2.121
XP_006231586	564334059	Sorcs1	PREDICTED: VPS10 domain-containing receptor SorCS1 isoform X10	typeI_membrane	8	PlasmaMembrane	2.097
XP_008758663	672040484	Sorcs1	PREDICTED: VPS10 domain-containing receptor SorCS1 isoform X11	multi-pass_membrane	7	PlasmaMembrane	1.546
XP_008758664	672040486	Sorcs1	PREDICTED: VPS10 domain-containing receptor SorCS1 isoform X12	typeI_membrane	7	PlasmaMembrane	1.431
NP_001178492	300797077	Sorcs1	VPS10 domain-containing receptor SorCS1 precursor	typeI_membrane	8	PlasmaMembrane	2.163
XP_008768502	672076678	Sorcs2	PREDICTED: VPS10 domain-containing receptor SorCS2 isoform X1	typeII_membrane	6	Extracellular	1.307
NP_001100695	170014691	Sorcs2	VPS10 domain receptor protein SORCS 2 precursor	typeI_membrane	7	Extracellular	1.486
XP_006233256	564338480	Sort1	PREDICTED: sortilin isoform X1	typeII_membrane	5	PlasmaMembrane	1.441
XP_006233257	564338482	Sort1	PREDICTED: sortilin isoform X2	typeII_membrane	5	Extracellular	1.494
XP_006233258	564338484	Sort1	PREDICTED: sortilin isoform X3	typeII_membrane	5	Extracellular	1.411
NP_113955	209954677	Sort1	sortilin precursor	typeI_membrane	5	PlasmaMembrane	1.546
NP_742064	25453372	Spon1	spondin-1 precursor	soluble_secreted	1	Extracellular	3.58
NP_037161	6981540	St8sia3	sia-alpha-2,3-Gal-beta-1,4-GlcNAc-R:alpha 2,8-sialyltransferase	typeII_membrane	3	PlasmaMembrane	2.916
XP_006242870	564363049	Stt3a	PREDICTED: dolichyl-diphosphooligosaccharide--protein glycosyltransferase subunit STT3A isoform X1	multi-pass_membrane	0	PlasmaMembrane	4.915
NP_001128221	197927176	Stt3a	dolichyl-diphosphooligosaccharide--protein glycosyltransferase subunit STT3A	multi-pass_membrane	0	PlasmaMembrane	4.95
NP_001164010	281485606	Stt3b	dolichyl-diphosphooligosaccharide--protein glycosyltransferase subunit STT3B	multi-pass_membrane	3	PlasmaMembrane	4.711
XP_008760728	672048121	Sulf2	PREDICTED: extracellular sulfatase Sulf-2 isoform X2	soluble_intracellular	0	Nuclear	2.866
XP_006235657	564344417	Sulf2	PREDICTED: extracellular sulfatase Sulf-2 isoform X3	soluble_intracellular	0	Nuclear	2.658
XP_006235658	564344419	Sulf2	PREDICTED: extracellular sulfatase Sulf-2 isoform X1	typeI_membrane	11	Nuclear	2.301
NP_001030099	110626131	Sulf2	extracellular sulfatase Sulf-2 precursor	typeI_membrane	11	Nuclear	2.301
XP_008767537	672073281	Svop	PREDICTED: synaptic vesicle 2-related protein isoform X1	multi-pass_membrane	0	PlasmaMembrane	4.882
XP_008767538	672073283	Svop	PREDICTED: synaptic vesicle 2-related protein isoform X2	multi-pass_membrane	0	PlasmaMembrane	4.908
NP_599231	72534840	Svop	synaptic vesicle 2-related protein	multi-pass_membrane	0	PlasmaMembrane	4.887
NP_445928	209870039	Synj1	synaptojanin-1	soluble_intracellular	0	Nuclear	2.355
XP_008756785	672032816	Tenm1	PREDICTED: LOW QUALITY PROTEIN: teneurin-1 isoform X1	soluble_intracellular	0	Extracellular	1.557
XP_008771754	672088585	Tenm1	PREDICTED: teneurin-1 isoform X2	soluble_intracellular	0	PlasmaMembrane	1.207
XP_008771755	672088587	Tenm1	PREDICTED: teneurin-1 isoform X3	soluble_intracellular	0	Extracellular	2.485
NP_064473	9910320	Tenm2	teneurin-2	typeII_membrane	11	Extracellular	1.627
XP_008769466	672080113	Tenm3	PREDICTED: teneurin-3 isoform X1	typeII_membrane	11	Extracellular	1.85
XP_008769467	672080115	Tenm3	PREDICTED: teneurin-3 isoform X2	typeII_membrane	11	Extracellular	1.854
XP_006253177	564389094	Tenm3	PREDICTED: teneurin-3 isoform X3	typeII_membrane	11	Extracellular	1.828
NP_001162604	281306744	Tenm3	teneurin-3	typeII_membrane	11	Extracellular	1.838
XP_008757940	672037836	Tenm4	PREDICTED: teneurin-4 isoform X1	typeII_membrane	13	Extracellular	1.627
NP_001178557	300798434	Tenm4	teneurin-4	typeII_membrane	13	Extracellular	1.627
XP_006248524	564377124	Tfrc	PREDICTED: transferrin receptor protein 1 isoform X1	typeII_membrane	5	PlasmaMembrane	1.48
XP_006248525	564377126	Tfrc	PREDICTED: transferrin receptor protein 1 isoform X1	typeII_membrane	5	PlasmaMembrane	1.48
NP_073203	281306746	Tfrc	transferrin receptor protein 1	typeII_membrane	5	PlasmaMembrane	1.48
NP_036805	6981654	Thy1	thy-1 membrane glycoprotein preproprotein	soluble_secreted	3	Extracellular	3.362
NP_001004267	51948502	Tmem106b	transmembrane protein 106B	typeII_membrane	4	Nuclear	1.658
NP_001182206	305632805	Tmem178b	transmembrane protein 178B precursor	multi-pass_membrane	3	PlasmaMembrane	4.389
XP_006243497	564364634	Tmem30a	PREDICTED: cell cycle control protein 50A isoform X1	multi-pass_membrane	6	PlasmaMembrane	2.405
NP_001004248	51948472	Tmem30a	cell cycle control protein 50A	multi-pass_membrane	4	PlasmaMembrane	2.123
NP_001073849	122891854	Tmem30b	cell cycle control protein 50B	multi-pass_membrane	5	PlasmaMembrane	1.954
XP_001063895	293343193	Tmx3	PREDICTED: protein disulfide-isomerase TMX3 isoform X1	typeI_membrane	0	PlasmaMembrane	1.585
XP_006222711	564321018	Tmx3	PREDICTED: protein disulfide-isomerase TMX3 isoform X2	typeII_membrane	1	Cytoplasmic	1.287
XP_006255098	564394339	Tmx3	PREDICTED: protein disulfide-isomerase TMX3 isoform X3	typeI_membrane	0	PlasmaMembrane	2.046
XP_008767191	672071990	Ttyh3	PREDICTED: protein tweety homolog 3 isoform X1	multi-pass_membrane	3	PlasmaMembrane	4.034
NP_001100594	157820133	Ttyh3	protein tweety homolog 3	multi-pass_membrane	3	PlasmaMembrane	4.14
XP_008769719	672081146	Txndc15	PREDICTED: thioredoxin domain-containing protein 15 isoform X1	typeI_membrane	6	PlasmaMembrane	1.708
NP_001020169	68163437	Txndc15	thioredoxin domain-containing protein 15 precursor	typeI_membrane	6	PlasmaMembrane	1.725
XP_006244796	564367910	Uggt1	PREDICTED: UDP-glucose:glycoprotein glucosyltransferase 1 isoform X1	typeI_membrane	3	Cytoplasmic	1.826
XP_006244797	564367912	Uggt1	PREDICTED: UDP-glucose:glycoprotein glucosyltransferase 1 isoform X2	typeI_membrane	3	Cytoplasmic	1.9
NP_598280	19424302	Uggt1	UDP-glucose:glycoprotein glucosyltransferase 1 precursor	soluble_secreted	3	Cytoplasmic	1.913
XP_008767354	672072636	Wbscr17	PREDICTED: putative polypeptide N-acetylgalactosaminyltransferase-like protein 3 isoform X1	soluble_intracellular	0	Mitochondrial	1.712
NP_001020283	68341983	Wbscr17	putative polypeptide N-acetylgalactosaminyltransferase-like protein 3	typeII_membrane	3	Mitochondrial	1.728
XP_008770393	672083557	Wdr7	PREDICTED: WD repeat-containing protein 7 isoform X1	soluble_intracellular	0	PlasmaMembrane	2.431
NP_076465	13027430	Wdr7	WD repeat-containing protein 7	soluble_intracellular	0	PlasmaMembrane	2.431
NP_001164567	283806636	Zfp831	zinc finger protein 831	soluble_intracellular	0	Nuclear	3.948

## Sheet: D
Supplementary file 1D. Input proteins. Proteins in total hippocampal extracts and/or in A or B groups, displayed as in Table 3.
Protein ID (Ref. Seq.)	GI	Gene Symbol	Protein Description	Protein Type	# N-Glyc Sites	Cello Prediction	Cello Score	GroupID
NP_001009437	57222294	Pomgnt2	protein O-linked-mannose beta-1,4-N-acetylglucosaminyltransferase 2 precursor	soluble_secreted	2	Mitochondrial	1.608	group071
NP_113970	13929106	Slc32a1	vesicular inhibitory amino acid transporter	multi-pass_membrane	2	PlasmaMembrane	4.898	group038
NP_445843	25742834	Hs3st1	heparan sulfate glucosamine 3-O-sulfotransferase 1 precursor	soluble_secreted	4	Mitochondrial	1.966	group128
NP_001019438	66730376	MGC109340	signal peptidase complex subunit 3	typeII_membrane	0	PlasmaMembrane	2.022	group203
XP_008773079	672014998	Sorcs1	PREDICTED: VPS10 domain-containing receptor SorCS1 isoform X1	multi-pass_membrane	7	PlasmaMembrane	1.546	group217
XP_008773080	672015000	Sorcs1	PREDICTED: VPS10 domain-containing receptor SorCS1 isoform X2	typeII_membrane	7	PlasmaMembrane	1.741	group217
XP_008773081	672015002	Sorcs1	PREDICTED: VPS10 domain-containing receptor SorCS1 isoform X3	typeI_membrane	7	PlasmaMembrane	1.431	group217
XP_006223866	564299497	Atrnl1	PREDICTED: attractin-like protein 1 isoform X1	typeII_membrane	14	Extracellular	2.372	group155
XP_003753614	392338713	Slc25a31	PREDICTED: ADP/ATP translocase 4 isoform X1	multi-pass_membrane	0	PlasmaMembrane	2.052	group110
XP_006224695	564302444	Itgav	PREDICTED: integrin alpha-V isoform X1	typeI_membrane	6	PlasmaMembrane	1.735	group014
XP_008773893	672018019	Adam22	PREDICTED: disintegrin and metalloproteinase domain-containing protein 22	typeI_membrane	1	Extracellular	2.561	group091
XP_008773939	672018245	Plxna4a	PREDICTED: plexin-A4	typeII_membrane	8	Nuclear	2.584	group104
XP_001072622	564304046	Plxna1	PREDICTED: plexin-A1 isoform X1	typeII_membrane	12	Nuclear	2.101	group075
XP_006226101	564308472	Plxnc1	PREDICTED: plexin-C1 isoform X1	multi-pass_membrane	20	PlasmaMembrane	1.892	group070
XP_008774773	672022247	Elfn2	PREDICTED: LOW QUALITY PROTEIN: protein phosphatase 1 regulatory subunit 29 isoform X1, partial	typeI_membrane	7	Nuclear	1.74	group161
XP_008774800	672022317	Adamts20	PREDICTED: A disintegrin and metalloproteinase with thrombospondin motifs 20 isoform X2	soluble_secreted	9	Extracellular	3.132	group098
XP_008774913	672022705	Hepacam	PREDICTED: hepatocyte cell adhesion molecule isoform X1	soluble_intracellular	0	Nuclear	2.845	group065
XP_008774970	672022994	Neo1	PREDICTED: neogenin, partial	multi-pass_membrane	8	Nuclear	2.193	group041
XP_001075237	564310639	P4htm	PREDICTED: transmembrane prolyl 4-hydroxylase	typeII_membrane	2	Mitochondrial	1.4	group083
XP_003752358	392331685	Ergic1	PREDICTED: endoplasmic reticulum-Golgi intermediate compartment protein 1 isoform X1	multi-pass_membrane	0	PlasmaMembrane	2.203	group094
XP_006221089	564313986	Fam171a2	PREDICTED: protein FAM171A2 isoform X1	typeI_membrane	4	PlasmaMembrane	2.274	group020
XP_008757336	672026568	B3galtl	PREDICTED: beta-1,3-glucosyltransferase isoform X1, partial	soluble_intracellular	0	Mitochondrial	1.26	group067
XP_008763736	672027926	Atp8a1	PREDICTED: phospholipid-transporting ATPase IA isoform X1	multi-pass_membrane	0	PlasmaMembrane	4.604	group187
XP_006222525	564320180	Fam171a1	PREDICTED: protein FAM171A1 isoform X1	typeII_membrane	0	Nuclear	3.935	group020
XP_006222526	564320182	Fam171a1	PREDICTED: protein FAM171A1 isoform X2	typeII_membrane	0	Nuclear	3.811	group020
XP_008772249	672030283	Fam171a1	PREDICTED: protein FAM171A1 isoform X3	typeII_membrane	0	Nuclear	3.703	group020
XP_006222527	564320184	Fam171a1	PREDICTED: protein FAM171A1 isoform X3	typeII_membrane	0	Nuclear	3.703	group020
XP_001063895	293343193	Tmx3	PREDICTED: protein disulfide-isomerase TMX3 isoform X1	typeI_membrane	0	PlasmaMembrane	1.585	group082
XP_006222711	564321018	Tmx3	PREDICTED: protein disulfide-isomerase TMX3 isoform X2	typeII_membrane	1	Cytoplasmic	1.287	group082
XP_006222868	564321746	RGD1306091	PREDICTED: mitogen-activated protein kinase kinase kinase MLK4 isoform X1	soluble_intracellular	0	Nuclear	3.515	group073
XP_006227529	564323127	Arxes2	PREDICTED: signal peptidase complex subunit 3	typeII_membrane	0	PlasmaMembrane	2.022	group203
XP_008756785	672032816	Tenm1	PREDICTED: LOW QUALITY PROTEIN: teneurin-1 isoform X1	soluble_intracellular	0	Extracellular	1.557	group166
XP_008756464	672033463	LOC102557454	PREDICTED: LOW QUALITY PROTEIN: RT1 class I histocompatibility antigen, AA alpha chain-like	typeI_membrane	1	Extracellular	1.388	group219
XP_006227248	564324270	LOC683761	PREDICTED: RT1 class I histocompatibility antigen, AA alpha chain-like, partial	typeII_membrane	1	Cytoplasmic	2.14	group219
XP_006227252	564324069	RT1-EC2	PREDICTED: class I histocompatibility antigen, Non-RT1.A alpha-1 chain, partial	typeII_membrane	1	Cytoplasmic	1.659	group219
XP_008756520	672033703	LOC100365176	PREDICTED: RT1 class I histocompatibility antigen, AA alpha chain-like, partial	typeII_membrane	0	Cytoplasmic	1.082	group219
XP_008756523	672033708	RT1-Cl	PREDICTED: LOW QUALITY PROTEIN: RT1 class Ib, locus Cl, partial	typeII_membrane	1	Mitochondrial	1.293	group219
XP_008756524	672033710	Rt1.aa	PREDICTED: MHC class I RT1.Aa alpha-chain	soluble_intracellular	0	Cytoplasmic	3.209	group219
XP_006227853	564324974	Clptm1l	PREDICTED: cleft lip and palate transmembrane protein 1-like protein isoform X1	multi-pass_membrane	0	PlasmaMembrane	3.794	group152
XP_008757110	672034924	Atp1a3	PREDICTED: sodium/potassium-transporting ATPase subunit alpha-3 isoform X1	multi-pass_membrane	0	PlasmaMembrane	4.042	group173
XP_006228638	564326930	Map3k10	PREDICTED: mitogen-activated protein kinase kinase kinase 10 isoform X1	soluble_intracellular	0	Nuclear	2.43	group073
XP_006228833	564327378	Lrfn3	PREDICTED: leucine-rich repeat and fibronectin type-III domain-containing protein 3 isoform X1	typeI_membrane	5	PlasmaMembrane	2.492	group160
XP_008757395	672035803	Lrfn1	PREDICTED: leucine-rich repeat and fibronectin type III domain-containing protein 1 isoform X1	typeI_membrane	3	PlasmaMembrane	3.554	group036
XP_006228688	564327036	Lrfn1	PREDICTED: leucine-rich repeat and fibronectin type III domain-containing protein 1 isoform X1	typeI_membrane	3	PlasmaMembrane	3.554	group036
XP_008757396	672035806	Lrfn1	PREDICTED: leucine-rich repeat and fibronectin type III domain-containing protein 1 isoform X1	typeI_membrane	3	PlasmaMembrane	3.554	group036
XP_006228690	564327040	Lrfn1	PREDICTED: leucine-rich repeat and fibronectin type III domain-containing protein 1 isoform X1	typeI_membrane	3	PlasmaMembrane	3.554	group036
XP_008757397	672035809	Lrfn1	PREDICTED: leucine-rich repeat and fibronectin type III domain-containing protein 1 isoform X1	typeI_membrane	3	PlasmaMembrane	3.554	group036
XP_006229170	564328178	Nomo1	PREDICTED: nodal modulator 1 isoform X1	soluble_secreted	5	PlasmaMembrane	1.631	group022
XP_006229721	564329595	Grm5	PREDICTED: metabotropic glutamate receptor 5 isoform X1	multi-pass_membrane	6	PlasmaMembrane	4.447	group063
XP_008757940	672037836	Tenm4	PREDICTED: teneurin-4 isoform X1	typeII_membrane	13	Extracellular	1.627	group166
XP_006231038	564332724	Ganab	PREDICTED: neutral alpha-glucosidase AB isoform X1	typeI_membrane	1	Cytoplasmic	1.112	group101
XP_006231039	564332726	Ganab	PREDICTED: neutral alpha-glucosidase AB isoform X2	typeI_membrane	1	Cytoplasmic	1.203	group101
XP_006231303	564333337	Ermp1	PREDICTED: endoplasmic reticulum metallopeptidase 1 isoform X1	multi-pass_membrane	1	PlasmaMembrane	4.824	group012
XP_006231587	564334061	Sorcs1	PREDICTED: VPS10 domain-containing receptor SorCS1 isoform X4	typeI_membrane	8	PlasmaMembrane	1.608	group217
XP_006231581	564334049	Sorcs1	PREDICTED: VPS10 domain-containing receptor SorCS1 isoform X5	typeI_membrane	8	PlasmaMembrane	1.856	group217
XP_006231582	564334051	Sorcs1	PREDICTED: VPS10 domain-containing receptor SorCS1 isoform X6	typeI_membrane	8	PlasmaMembrane	1.919	group217
XP_006231583	564334053	Sorcs1	PREDICTED: VPS10 domain-containing receptor SorCS1 isoform X7	typeI_membrane	8	PlasmaMembrane	1.684	group217
XP_006231584	564334055	Sorcs1	PREDICTED: VPS10 domain-containing receptor SorCS1 isoform X8	typeI_membrane	8	PlasmaMembrane	1.79	group217
XP_006231585	564334057	Sorcs1	PREDICTED: VPS10 domain-containing receptor SorCS1 isoform X9	typeI_membrane	8	PlasmaMembrane	2.121	group217
XP_006231586	564334059	Sorcs1	PREDICTED: VPS10 domain-containing receptor SorCS1 isoform X10	typeI_membrane	8	PlasmaMembrane	2.097	group217
XP_008758663	672040484	Sorcs1	PREDICTED: VPS10 domain-containing receptor SorCS1 isoform X11	multi-pass_membrane	7	PlasmaMembrane	1.546	group217
XP_008758664	672040486	Sorcs1	PREDICTED: VPS10 domain-containing receptor SorCS1 isoform X12	typeI_membrane	7	PlasmaMembrane	1.431	group217
XP_006231663	564334282	Add3	PREDICTED: gamma-adducin isoform X2	soluble_intracellular	0	Nuclear	3.288	group196
XP_006231661	564334278	Add3	PREDICTED: gamma-adducin isoform X2	soluble_intracellular	0	Nuclear	3.288	group196
XP_006231662	564334280	Add3	PREDICTED: gamma-adducin isoform X2	soluble_intracellular	0	Nuclear	3.288	group196
XP_008758732	672040698	Add3	PREDICTED: gamma-adducin isoform X2	soluble_intracellular	0	Nuclear	3.288	group196
XP_006231664	564334284	Add3	PREDICTED: gamma-adducin isoform X2	soluble_intracellular	0	Nuclear	3.288	group196
XP_008758733	672040701	Add3	PREDICTED: gamma-adducin isoform X1	soluble_intracellular	0	Nuclear	2.998	group196
XP_008758809	672040941	Atrnl1	PREDICTED: attractin-like protein 1 isoform X2	typeII_membrane	14	Extracellular	2.515	group155
XP_008758941	672041398	Rab3c	PREDICTED: ras-related protein Rab-3C isoform X1	soluble_intracellular	0	Cytoplasmic	1.549	group064
XP_001069558	392345613	Slc25a31	PREDICTED: ADP/ATP translocase 4 isoform X2	multi-pass_membrane	0	PlasmaMembrane	1.37	group110
XP_008759313	672042681	Slitrk3	PREDICTED: SLIT and NTRK-like protein 3 isoform X1	multi-pass_membrane	6	Nuclear	1.649	group134
XP_006232552	564336816	Slitrk3	PREDICTED: SLIT and NTRK-like protein 3 isoform X1	multi-pass_membrane	6	Nuclear	1.649	group134
XP_006232657	564337070	Bcan	PREDICTED: brevican core protein isoform X2	soluble_intracellular	0	Nuclear	1.878	group087
XP_006232658	564337073	Bcan	PREDICTED: brevican core protein isoform X1	soluble_secreted	2	Nuclear	1.537	group087
XP_006232659	564337075	Bcan	PREDICTED: brevican core protein isoform X1	soluble_secreted	2	Nuclear	1.537	group087
XP_008759372	672042946	Sema4a	PREDICTED: semaphorin-4A isoform X1	typeI_membrane	3	PlasmaMembrane	1.545	group025
XP_006232701	564337164	Sema4a	PREDICTED: semaphorin-4A isoform X1	typeI_membrane	3	PlasmaMembrane	1.545	group025
XP_006232703	564337168	Sema4a	PREDICTED: semaphorin-4A isoform X1	typeI_membrane	3	PlasmaMembrane	1.545	group025
XP_006232702	564337166	Sema4a	PREDICTED: semaphorin-4A isoform X1	typeI_membrane	3	PlasmaMembrane	1.545	group025
XP_006233256	564338480	Sort1	PREDICTED: sortilin isoform X1	typeII_membrane	5	PlasmaMembrane	1.441	group117
XP_006233257	564338482	Sort1	PREDICTED: sortilin isoform X2	typeII_membrane	5	Extracellular	1.494	group117
XP_006233258	564338484	Sort1	PREDICTED: sortilin isoform X3	typeII_membrane	5	Extracellular	1.411	group117
XP_006233706	564339627	Entpd2	PREDICTED: ectonucleoside triphosphate diphosphohydrolase 2 isoform X1	multi-pass_membrane	7	PlasmaMembrane	2.362	group121
XP_008759828	672044723	Entpd2	PREDICTED: ectonucleoside triphosphate diphosphohydrolase 2 isoform X2	typeI_membrane	6	Extracellular	2.173	group121
XP_006234111	564340557	Rab14	PREDICTED: ras-related protein Rab-14 isoform X1	soluble_intracellular	0	Cytoplasmic	2.184	group136
XP_006234112	564340559	Rab14	PREDICTED: ras-related protein Rab-14 isoform X1	soluble_intracellular	0	Cytoplasmic	2.184	group136
XP_006234413	564341337	Itga6	PREDICTED: integrin alpha-6 isoform X1	typeI_membrane	6	Nuclear	1.474	group032
XP_008760136	672045844	Scn3a	PREDICTED: sodium channel protein type 3 subunit alpha isoform X2	multi-pass_membrane	6	PlasmaMembrane	4.722	group021
XP_008760137	672045846	Scn3a	PREDICTED: sodium channel protein type 3 subunit alpha isoform X2	multi-pass_membrane	6	PlasmaMembrane	4.722	group021
XP_008760138	672045848	Scn3a	PREDICTED: sodium channel protein type 3 subunit alpha isoform X3	multi-pass_membrane	6	PlasmaMembrane	4.718	group021
XP_008760139	672045850	Scn3a	PREDICTED: sodium channel protein type 3 subunit alpha isoform X4	multi-pass_membrane	6	PlasmaMembrane	4.722	group021
XP_008760140	672045852	Scn3a	PREDICTED: sodium channel protein type 3 subunit alpha isoform X5	multi-pass_membrane	6	PlasmaMembrane	4.755	group021
XP_008760141	672045854	Scn3a	PREDICTED: sodium channel protein type 3 subunit alpha isoform X1	multi-pass_membrane	6	PlasmaMembrane	4.754	group021
XP_008760142	672045856	Scn3a	PREDICTED: sodium channel protein type 3 subunit alpha isoform X6	multi-pass_membrane	6	PlasmaMembrane	4.753	group021
XP_008760222	672046176	Itgav	PREDICTED: LOW QUALITY PROTEIN: integrin alpha-V isoform X2	typeI_membrane	5	PlasmaMembrane	1.436	group014
XP_006234689	564342033	Cd44	PREDICTED: CD44 antigen isoform X1	typeI_membrane	9	Extracellular	2.262	group080
XP_008760277	672046382	Cd44	PREDICTED: CD44 antigen isoform X2	typeI_membrane	9	Extracellular	2.656	group080
XP_008760278	672046384	Cd44	PREDICTED: CD44 antigen isoform X3	typeI_membrane	8	Extracellular	2.34	group080
XP_006234691	564342037	Cd44	PREDICTED: CD44 antigen isoform X4	typeI_membrane	7	Extracellular	2.306	group080
XP_008760279	672046387	Cd44	PREDICTED: CD44 antigen isoform X5	typeI_membrane	8	Extracellular	2.418	group080
XP_008760280	672046389	Cd44	PREDICTED: CD44 antigen isoform X6	typeI_membrane	7	Extracellular	1.82	group080
XP_006234693	564342041	Cd44	PREDICTED: CD44 antigen isoform X7	typeI_membrane	4	Extracellular	1.497	group080
XP_008760281	672046392	Cd44	PREDICTED: CD44 antigen isoform X8	typeI_membrane	10	Nuclear	1.926	group080
XP_006234818	564342364	Disp2	PREDICTED: protein dispatched homolog 2 isoform X1	multi-pass_membrane	3	PlasmaMembrane	3.592	group207
XP_006234772	564342248	Slc12a6	PREDICTED: solute carrier family 12 member 6 isoform X1	multi-pass_membrane	5	PlasmaMembrane	4.717	group079
XP_006234773	564342250	Slc12a6	PREDICTED: solute carrier family 12 member 6 isoform X2	multi-pass_membrane	5	PlasmaMembrane	4.585	group079
XP_008760522	672047395	Ggt7	PREDICTED: gamma-glutamyltransferase 7 isoform X1	typeII_membrane	6	Cytoplasmic	1.712	group081
XP_008760523	672047397	Ggt7	PREDICTED: gamma-glutamyltransferase 7 isoform X2	typeII_membrane	6	Cytoplasmic	1.631	group081
XP_006235330	564343663	Hm13	PREDICTED: minor histocompatibility antigen H13 isoform X1	multi-pass_membrane	2	PlasmaMembrane	4.942	group156
XP_006235331	564343665	Hm13	PREDICTED: minor histocompatibility antigen H13 isoform X2	multi-pass_membrane	2	PlasmaMembrane	4.908	group058
XP_008760552	672047474	Hm13	PREDICTED: minor histocompatibility antigen H13 isoform X3	multi-pass_membrane	2	PlasmaMembrane	4.907	group156
XP_006235277	564343538	Apmap	PREDICTED: adipocyte plasma membrane-associated protein isoform X2	typeII_membrane	1	Cytoplasmic	1.018	group148
XP_008760584	672047581	Apmap	PREDICTED: adipocyte plasma membrane-associated protein isoform X1	soluble_secreted	1	Cytoplasmic	1.08	group148
XP_006235279	564343542	Apmap	PREDICTED: adipocyte plasma membrane-associated protein isoform X3	soluble_intracellular	0	Cytoplasmic	2.15	group148
XP_006235503	564344048	Slc32a1	PREDICTED: vesicular inhibitory amino acid transporter isoform X1	multi-pass_membrane	2	PlasmaMembrane	4.898	group038
XP_006235594	564344291	Pigt	PREDICTED: GPI transamidase component PIG-T isoform X1	multi-pass_membrane	2	Lysosomal	2.143	group218
XP_008760728	672048121	Sulf2	PREDICTED: extracellular sulfatase Sulf-2 isoform X2	soluble_intracellular	0	Nuclear	2.866	group180
XP_006235657	564344417	Sulf2	PREDICTED: extracellular sulfatase Sulf-2 isoform X3	soluble_intracellular	0	Nuclear	2.658	group180
XP_006235658	564344419	Sulf2	PREDICTED: extracellular sulfatase Sulf-2 isoform X1	typeI_membrane	11	Nuclear	2.301	group180
XP_006235935	564345236	Reln	PREDICTED: reelin isoform X1	typeI_membrane	14	Extracellular	2.271	group183
XP_006235942	564345250	Dpp6	PREDICTED: dipeptidyl aminopeptidase-like protein 6 isoform X1	typeII_membrane	6	Nuclear	1.594	group090
XP_008760921	672048833	Pon2	PREDICTED: serum paraoxonase/arylesterase 2 isoform X1	typeII_membrane	2	Mitochondrial	2.512	group099
XP_008760970	672049055	Adam22	PREDICTED: disintegrin and metalloproteinase domain-containing protein 22	typeI_membrane	1	Extracellular	2.561	group091
XP_006236199	564345936	Ptprz1	PREDICTED: receptor-type tyrosine-protein phosphatase zeta isoform X1	typeI_membrane	16	Nuclear	3.218	group197
XP_006236200	564345938	Ptprz1	PREDICTED: receptor-type tyrosine-protein phosphatase zeta isoform X2	typeI_membrane	11	Nuclear	2.219	group197
XP_006236201	564345940	Ptprz1	PREDICTED: receptor-type tyrosine-protein phosphatase zeta isoform X3	typeI_membrane	11	Nuclear	2.228	group197
XP_008761081	672049453	Plxna4a	PREDICTED: plexin-A4	typeII_membrane	8	Nuclear	2.584	group104
XP_008761203	672049933	Immt	PREDICTED: mitochondrial inner membrane protein isoform X1	soluble_intracellular	0	Cytoplasmic	2.172	group093
XP_008761204	672049935	Immt	PREDICTED: mitochondrial inner membrane protein isoform X2	soluble_intracellular	0	Cytoplasmic	2.16	group093
XP_008761205	672049937	Immt	PREDICTED: mitochondrial inner membrane protein isoform X3	soluble_intracellular	0	Cytoplasmic	2.158	group093
XP_008761206	672049939	Immt	PREDICTED: mitochondrial inner membrane protein isoform X4	soluble_intracellular	0	Cytoplasmic	2.179	group093
XP_008761207	672049941	Immt	PREDICTED: mitochondrial inner membrane protein isoform X5	soluble_intracellular	0	Cytoplasmic	2.178	group093
XP_008761208	672049943	Immt	PREDICTED: mitochondrial inner membrane protein isoform X6	soluble_intracellular	0	Cytoplasmic	2.099	group093
XP_008761209	672049945	Immt	PREDICTED: mitochondrial inner membrane protein isoform X7	soluble_intracellular	0	Cytoplasmic	2.049	group093
XP_008761210	672049947	Immt	PREDICTED: mitochondrial inner membrane protein isoform X8	soluble_intracellular	0	Cytoplasmic	2.062	group093
XP_008761211	672049949	Immt	PREDICTED: mitochondrial inner membrane protein isoform X9	soluble_intracellular	0	Cytoplasmic	2.028	group093
XP_008761212	672049951	Immt	PREDICTED: mitochondrial inner membrane protein isoform X10	soluble_intracellular	0	Cytoplasmic	1.815	group093
XP_008761308	672050277	LOC103692171	PREDICTED: mannosyl-oligosaccharide glucosidase	typeII_membrane	1	Mitochondrial	1.554	group053
XP_002729444	392347490	Plxna1	PREDICTED: plexin-A1 isoform X2	typeI_membrane	12	Nuclear	2.026	group075
XP_006236977	564347895	Adamts9	PREDICTED: A disintegrin and metalloproteinase with thrombospondin motifs 9 isoform X1	soluble_secreted	9	Extracellular	3.037	group098
XP_008761348	672050432	Adamts9	PREDICTED: A disintegrin and metalloproteinase with thrombospondin motifs 9 isoform X2	soluble_secreted	9	Extracellular	2.98	group098
XP_006236978	564347897	Adamts9	PREDICTED: A disintegrin and metalloproteinase with thrombospondin motifs 9 isoform X3	soluble_secreted	9	Extracellular	3.026	group098
XP_006236983	564347908	Nup210	PREDICTED: nuclear pore membrane glycoprotein 210 isoform X1	typeII_membrane	11	PlasmaMembrane	1.691	group035
XP_008761469	672050874	M6pr	PREDICTED: cation-dependent mannose-6-phosphate receptor isoform X1	typeI_membrane	5	PlasmaMembrane	1.713	group114
XP_008761470	672050876	M6pr	PREDICTED: cation-dependent mannose-6-phosphate receptor isoform X1	typeI_membrane	5	PlasmaMembrane	1.713	group114
XP_008761621	672051433	RGD1306151	PREDICTED: uncharacterized protein KIAA1467 homolog isoform X2	typeII_membrane	4	PlasmaMembrane	1.266	group191
XP_008761859	672052313	RGD1309821	PREDICTED: uncharacterized family 31 glucosidase KIAA1161 homolog isoform X1	typeII_membrane	5	PlasmaMembrane	1.11	group216
XP_006238156	564350865	RGD1309821	PREDICTED: uncharacterized family 31 glucosidase KIAA1161 homolog isoform X1	typeII_membrane	5	PlasmaMembrane	1.11	group216
XP_008761930	672052593	Abca1	PREDICTED: ATP-binding cassette sub-family A member 1 isoform X1	multi-pass_membrane	11	PlasmaMembrane	3.043	group195
XP_008761931	672052595	Abca1	PREDICTED: ATP-binding cassette sub-family A member 1 isoform X2	multi-pass_membrane	11	PlasmaMembrane	3.043	group195
XP_008761932	672052597	Abca1	PREDICTED: ATP-binding cassette sub-family A member 1 isoform X3	multi-pass_membrane	11	PlasmaMembrane	3.094	group195
XP_006238919	564352814	Grik3	PREDICTED: glutamate receptor ionotropic, kainate 3 isoform X1	multi-pass_membrane	10	PlasmaMembrane	3.938	group194
XP_006238743	564352390	Ptprf	PREDICTED: receptor-type tyrosine-protein phosphatase F isoform X4	typeII_membrane	6	Nuclear	1.645	group205
XP_006239521	564354237	H6pd	PREDICTED: GDH/6PGL endoplasmic bifunctional protein isoform X1	soluble_secreted	2	Cytoplasmic	1.713	group202
XP_006239522	564354239	H6pd	PREDICTED: GDH/6PGL endoplasmic bifunctional protein isoform X1	soluble_secreted	2	Cytoplasmic	1.713	group202
XP_006239307	564353698	Emc1	PREDICTED: ER membrane protein complex subunit 1 isoform X1	soluble_secreted	3	PlasmaMembrane	1.738	group084
XP_008762909	672056213	Lrfn5	PREDICTED: leucine-rich repeat and fibronectin type-III domain-containing protein 5 isoform X1	typeI_membrane	6	PlasmaMembrane	2.172	group108
XP_008762910	672056216	Mdga2	PREDICTED: MAM domain-containing glycosylphosphatidylinositol anchor protein 2 isoform X1	typeII_membrane	6	PlasmaMembrane	1.644	group149
XP_008762953	672056413	Nrxn3	PREDICTED: neurexin-3 isoform X1	typeII_membrane	5	Nuclear	1.35	group048
XP_008762954	672056415	Nrxn3	PREDICTED: neurexin-3 isoform X2	typeI_membrane	3	PlasmaMembrane	1.619	group048
XP_008762955	672056417	Nrxn3	PREDICTED: neurexin-3 isoform X3	typeI_membrane	3	Nuclear	1.408	group048
XP_006240365	564356552	Map3k9	PREDICTED: mitogen-activated protein kinase kinase kinase 9 isoform X1	soluble_intracellular	0	Nuclear	3.51	group073
XP_006240759	564357619	Itgb8	PREDICTED: integrin beta-8 isoform X1	typeI_membrane	5	Extracellular	4.098	group146
XP_006240862	564357861	Itga7	PREDICTED: integrin alpha-7 isoform X1	typeII_membrane	4	Cytoplasmic	1.451	group123
XP_008763266	672057559	Itga7	PREDICTED: integrin alpha-7 isoform X2	typeII_membrane	3	Cytoplasmic	1.356	group123
XP_008763544	672058561	Plxnc1	PREDICTED: plexin-C1 isoform X2	multi-pass_membrane	22	PlasmaMembrane	2.131	group070
XP_008763615	672058769	Lrp1	PREDICTED: prolow-density lipoprotein receptor-related protein 1 isoform X1	soluble_secreted	22	Extracellular	3.044	group167
XP_006242239	564361428	Cntn1	PREDICTED: contactin-1 isoform X1	soluble_secreted	9	PlasmaMembrane	1.207	group010
XP_008763881	672059772	Cntn1	PREDICTED: contactin-1 isoform X2	soluble_secreted	8	Chloroplast	1.563	group010
XP_006242149	564361198	Naga	PREDICTED: alpha-N-acetylgalactosaminidase isoform X1	soluble_secreted	4	Lysosomal	2.732	group030
XP_006242150	564361200	Naga	PREDICTED: alpha-N-acetylgalactosaminidase isoform X1	soluble_secreted	4	Lysosomal	2.732	group030
XP_006242103	672060362	Elfn2	PREDICTED: protein phosphatase 1 regulatory subunit 29 isoform X2	typeI_membrane	7	Nuclear	1.647	group161
XP_008764101	672060701	Adamts20	PREDICTED: LOW QUALITY PROTEIN: A disintegrin and metalloproteinase with thrombospondin motifs 20 isoform X3	soluble_secreted	9	Extracellular	3.124	group098
XP_006242870	564363049	Stt3a	PREDICTED: dolichyl-diphosphooligosaccharide--protein glycosyltransferase subunit STT3A isoform X1	multi-pass_membrane	0	PlasmaMembrane	4.915	group097
XP_002729937	392349939	Hepacam	PREDICTED: LOW QUALITY PROTEIN: hepatocyte cell adhesion molecule isoform X2	typeII_membrane	6	Nuclear	3.421	group065
XP_008764365	672061591	Hyou1	PREDICTED: hypoxia up-regulated protein 1 isoform X2	typeII_membrane	5	Cytoplasmic	2.408	group182
XP_006242946	564363268	Hyou1	PREDICTED: hypoxia up-regulated protein 1 isoform X1	typeI_membrane	5	Cytoplasmic	2.795	group182
XP_006242947	564363270	Hyou1	PREDICTED: hypoxia up-regulated protein 1 isoform X1	typeI_membrane	5	Cytoplasmic	2.795	group182
XP_006243431	564364463	Adam10	PREDICTED: disintegrin and metalloproteinase domain-containing protein 10 isoform X1	typeII_membrane	4	Nuclear	2.318	group017
XP_006243224	564363946	Hexa	PREDICTED: beta-hexosaminidase subunit alpha isoform X1	soluble_intracellular	0	Lysosomal	2.418	group023
XP_006243497	564364634	Tmem30a	PREDICTED: cell cycle control protein 50A isoform X1	multi-pass_membrane	6	PlasmaMembrane	2.405	group026
XP_008764492	672062026	Lingo1	PREDICTED: leucine-rich repeat and immunoglobulin-like domain-containing nogo receptor-interacting protein 1 isoform X1	typeI_membrane	8	PlasmaMembrane	2.447	group102
XP_006243182	564363844	Lingo1	PREDICTED: leucine-rich repeat and immunoglobulin-like domain-containing nogo receptor-interacting protein 1 isoform X1	typeI_membrane	8	PlasmaMembrane	2.447	group102
XP_008764493	672062029	Lingo1	PREDICTED: leucine-rich repeat and immunoglobulin-like domain-containing nogo receptor-interacting protein 1 isoform X1	typeI_membrane	8	PlasmaMembrane	2.447	group102
XP_006243183	564363846	Lingo1	PREDICTED: leucine-rich repeat and immunoglobulin-like domain-containing nogo receptor-interacting protein 1 isoform X1	typeI_membrane	8	PlasmaMembrane	2.447	group102
XP_008764495	672062037	Sema7a	PREDICTED: semaphorin-7A isoform X1	typeII_membrane	3	Nuclear	1.78	group133
XP_008764552	672062216	Nptn	PREDICTED: neuroplastin isoform X3	typeI_membrane	5	Extracellular	1.695	group140
XP_008764654	672062665	Neo1	PREDICTED: neogenin, partial	multi-pass_membrane	8	Nuclear	2.193	group041
XP_006243796	564365394	Cacna2d2	PREDICTED: voltage-dependent calcium channel subunit alpha-2/delta-2 isoform X1	soluble_intracellular	0	PlasmaMembrane	1.104	group061
XP_006243797	564365396	Cacna2d2	PREDICTED: voltage-dependent calcium channel subunit alpha-2/delta-2 isoform X2	soluble_intracellular	0	PlasmaMembrane	1.097	group061
XP_006243798	564365398	Cacna2d2	PREDICTED: voltage-dependent calcium channel subunit alpha-2/delta-2 isoform X3	soluble_intracellular	0	PlasmaMembrane	1.186	group061
XP_006243799	564365400	Cacna2d2	PREDICTED: voltage-dependent calcium channel subunit alpha-2/delta-2 isoform X4	soluble_intracellular	0	PlasmaMembrane	1.192	group061
XP_217285	564365719	P4htm	PREDICTED: transmembrane prolyl 4-hydroxylase	typeII_membrane	2	Mitochondrial	1.4	group083
XP_008764903	672063612	Pomgnt2	PREDICTED: protein O-linked-mannose beta-1,4-N-acetylglucosaminyltransferase 2 isoform X1	soluble_secreted	2	Mitochondrial	1.608	group071
XP_008764904	672063614	Pomgnt2	PREDICTED: protein O-linked-mannose beta-1,4-N-acetylglucosaminyltransferase 2 isoform X1	soluble_secreted	2	Mitochondrial	1.608	group071
XP_008764905	672063616	Pomgnt2	PREDICTED: protein O-linked-mannose beta-1,4-N-acetylglucosaminyltransferase 2 isoform X1	soluble_secreted	2	Mitochondrial	1.608	group071
XP_006244410	564366913	Sema6b	PREDICTED: semaphorin-6B isoform X2	typeII_membrane	7	PlasmaMembrane	2.587	group158
XP_006244411	564366915	Sema6b	PREDICTED: semaphorin-6B isoform X1	typeI_membrane	6	PlasmaMembrane	2.744	group158
XP_006244491	564367102	Lrfn2	PREDICTED: leucine-rich repeat and fibronectin type-III domain-containing protein 2 isoform X1	typeII_membrane	6	PlasmaMembrane	2.203	group150
XP_006244796	564367910	Uggt1	PREDICTED: UDP-glucose:glycoprotein glucosyltransferase 1 isoform X1	typeI_membrane	3	Cytoplasmic	1.826	group019
XP_006244797	564367912	Uggt1	PREDICTED: UDP-glucose:glycoprotein glucosyltransferase 1 isoform X2	typeI_membrane	3	Cytoplasmic	1.9	group019
XP_008765850	672067122	Ergic1	PREDICTED: endoplasmic reticulum-Golgi intermediate compartment protein 1 isoform X2	multi-pass_membrane	0	PlasmaMembrane	1.978	group094
XP_006246189	564371404	Gabrb2	PREDICTED: gamma-aminobutyric acid receptor subunit beta-2 isoform X1	multi-pass_membrane	3	PlasmaMembrane	4.851	group169
XP_008765857	672067140	Gabrb2	PREDICTED: gamma-aminobutyric acid receptor subunit beta-2 isoform X2	multi-pass_membrane	3	PlasmaMembrane	4.678	group169
XP_006246185	564371390	Gabra1	PREDICTED: gamma-aminobutyric acid receptor subunit alpha-1 isoform X1	multi-pass_membrane	2	PlasmaMembrane	4.23	group088
XP_006246186	564371392	Gabra1	PREDICTED: gamma-aminobutyric acid receptor subunit alpha-1 isoform X1	multi-pass_membrane	2	PlasmaMembrane	4.23	group088
XP_006246187	564371394	Gabrg2	PREDICTED: gamma-aminobutyric acid receptor subunit gamma-2 isoform X1	multi-pass_membrane	3	PlasmaMembrane	4.72	group177
XP_006246642	564372502	Atp1b2	PREDICTED: sodium/potassium-transporting ATPase subunit beta-2 isoform X1	typeII_membrane	5	Extracellular	2.17	group046
XP_006246643	564372504	Atp1b2	PREDICTED: sodium/potassium-transporting ATPase subunit beta-2 isoform X2	typeII_membrane	5	Extracellular	2.089	group046
XP_002727867	392351637	Fam171a2	PREDICTED: protein FAM171A2 isoform X2	multi-pass_membrane	4	PlasmaMembrane	2.152	group020
XP_006247535	564374603	Fam171a2	PREDICTED: protein FAM171A2 isoform X3	typeI_membrane	4	PlasmaMembrane	1.995	group020
XP_006247536	564374605	Fam171a2	PREDICTED: protein FAM171A2 isoform X4	multi-pass_membrane	3	Nuclear	2.66	group020
XP_006247307	672069435	LOC102552659	PREDICTED: receptor tyrosine-protein kinase erbB-2-like, partial	typeII_membrane	1	Nuclear	2.304	group073
XP_006247621	564374804	Scn4a	PREDICTED: sodium channel protein type 4 subunit alpha isoform X1	multi-pass_membrane	3	PlasmaMembrane	4.674	group021
XP_008766593	672069788	Btbd17	PREDICTED: BTB/POZ domain-containing protein 17 isoform X1	soluble_intracellular	0	PlasmaMembrane	1.713	group163
XP_006247753	564375117	Btbd17	PREDICTED: BTB/POZ domain-containing protein 17 isoform X2	soluble_secreted	4	Mitochondrial	1.957	group163
XP_006247754	564375119	Btbd17	PREDICTED: BTB/POZ domain-containing protein 17 isoform X3	soluble_secreted	4	Mitochondrial	1.957	group163
XP_008766755	672070410	Robo1	PREDICTED: roundabout homolog 1 isoform X1	soluble_intracellular	0	Nuclear	3.756	group193
XP_008766756	672070412	Robo1	PREDICTED: roundabout homolog 1 isoform X2	soluble_intracellular	0	Nuclear	3.748	group193
XP_008766757	672070414	Robo1	PREDICTED: roundabout homolog 1 isoform X3	soluble_intracellular	0	Nuclear	3.765	group193
XP_008766758	672070416	Robo1	PREDICTED: roundabout homolog 1 isoform X4	soluble_intracellular	0	Nuclear	3.803	group193
XP_008766759	672070418	Robo2	PREDICTED: roundabout homolog 2 isoform X1	soluble_intracellular	0	Nuclear	3.646	group111
XP_008766760	672070420	Robo2	PREDICTED: roundabout homolog 2 isoform X2	typeII_membrane	5	Nuclear	3.499	group111
XP_008766761	672070422	Robo2	PREDICTED: roundabout homolog 2 isoform X3	typeII_membrane	5	Nuclear	3.472	group111
XP_006248115	564376065	Grik1	PREDICTED: glutamate receptor ionotropic, kainate 1 isoform X1	multi-pass_membrane	9	PlasmaMembrane	4.449	group062
XP_006248116	564376067	Grik1	PREDICTED: glutamate receptor ionotropic, kainate 1 isoform X2	multi-pass_membrane	9	PlasmaMembrane	4.365	group062
XP_006248324	564376633	Cd47	PREDICTED: leukocyte surface antigen CD47 isoform X1	multi-pass_membrane	5	PlasmaMembrane	4.644	group095
XP_006248325	564376636	Cd47	PREDICTED: leukocyte surface antigen CD47 isoform X2	multi-pass_membrane	5	PlasmaMembrane	4.491	group095
XP_006248326	564376638	Cd47	PREDICTED: leukocyte surface antigen CD47 isoform X3	multi-pass_membrane	5	PlasmaMembrane	4.501	group095
XP_006248327	564376640	Cd47	PREDICTED: leukocyte surface antigen CD47 isoform X4	multi-pass_membrane	5	PlasmaMembrane	4.372	group095
XP_006248328	564376643	Cd47	PREDICTED: leukocyte surface antigen CD47 isoform X5	multi-pass_membrane	5	PlasmaMembrane	4.883	group095
XP_006248329	564376645	Cd47	PREDICTED: leukocyte surface antigen CD47 isoform X6	multi-pass_membrane	5	PlasmaMembrane	4.736	group095
XP_006248330	564376647	Cd47	PREDICTED: leukocyte surface antigen CD47 isoform X7	multi-pass_membrane	4	PlasmaMembrane	4.864	group095
XP_006248524	564377124	Tfrc	PREDICTED: transferrin receptor protein 1 isoform X1	typeII_membrane	5	PlasmaMembrane	1.48	group142
XP_006248525	564377126	Tfrc	PREDICTED: transferrin receptor protein 1 isoform X1	typeII_membrane	5	PlasmaMembrane	1.48	group142
XP_006248566	564377259	Il1rap	PREDICTED: interleukin-1 receptor accessory protein isoform X1	typeI_membrane	8	PlasmaMembrane	2.018	group115
XP_006248986	564378373	Elfn1	PREDICTED: protein ELFN1 isoform X1	typeI_membrane	8	Nuclear	1.72	group044
XP_008767171	672071938	Elfn1	PREDICTED: protein ELFN1 isoform X1	typeI_membrane	8	Nuclear	1.72	group044
XP_006248988	564378377	Elfn1	PREDICTED: protein ELFN1 isoform X1	typeI_membrane	8	Nuclear	1.72	group044
XP_008767191	672071990	Ttyh3	PREDICTED: protein tweety homolog 3 isoform X1	multi-pass_membrane	3	PlasmaMembrane	4.034	group204
XP_008767276	672072366	B3galtl	PREDICTED: beta-1,3-glucosyltransferase isoform X2	soluble_intracellular	0	Nuclear	2.091	group067
XP_008767354	672072636	Wbscr17	PREDICTED: putative polypeptide N-acetylgalactosaminyltransferase-like protein 3 isoform X1	soluble_intracellular	0	Mitochondrial	1.712	group072
XP_006249439	564379463	Rpl6	PREDICTED: 60S ribosomal protein L6 isoform X2	soluble_intracellular	0	Nuclear	2.828	group227
XP_006249440	564379465	Rpl6	PREDICTED: 60S ribosomal protein L6 isoform X1	soluble_intracellular	0	Nuclear	2.859	group227
XP_008767537	672073281	Svop	PREDICTED: synaptic vesicle 2-related protein isoform X1	multi-pass_membrane	0	PlasmaMembrane	4.882	group214
XP_008767538	672073283	Svop	PREDICTED: synaptic vesicle 2-related protein isoform X2	multi-pass_membrane	0	PlasmaMembrane	4.908	group214
XP_008767628	672073585	Nfasc	PREDICTED: neurofascin isoform X1	typeI_membrane	11	Nuclear	1.782	group005
XP_008767629	672073587	Nfasc	PREDICTED: neurofascin isoform X2	typeI_membrane	11	Nuclear	1.722	group005
XP_006249789	564380416	Nfasc	PREDICTED: neurofascin isoform X3	typeII_membrane	11	Nuclear	1.783	group005
XP_008767630	672073590	Nfasc	PREDICTED: neurofascin isoform X4	typeI_membrane	11	Nuclear	1.773	group005
XP_008767631	672073592	Nfasc	PREDICTED: neurofascin isoform X5	typeI_membrane	11	Nuclear	1.672	group005
XP_008767632	672073594	Nfasc	PREDICTED: neurofascin isoform X6	typeI_membrane	11	Nuclear	1.579	group005
XP_008767633	672073596	Nfasc	PREDICTED: neurofascin isoform X7	typeI_membrane	9	Nuclear	1.928	group005
XP_008767634	672073598	Nfasc	PREDICTED: neurofascin isoform X8	typeI_membrane	11	Nuclear	1.664	group005
XP_008767635	672073600	Nfasc	PREDICTED: neurofascin isoform X9	typeI_membrane	11	Nuclear	1.595	group005
XP_006249796	564380430	Nfasc	PREDICTED: neurofascin isoform X10	typeII_membrane	11	Nuclear	1.566	group005
XP_008767636	672073603	Nfasc	PREDICTED: neurofascin isoform X11	typeI_membrane	9	Nuclear	2.186	group005
XP_008767637	672073605	Nfasc	PREDICTED: neurofascin isoform X12	typeI_membrane	9	Nuclear	2.21	group005
XP_008767638	672073607	Nfasc	PREDICTED: neurofascin isoform X13	typeI_membrane	9	Nuclear	2.116	group005
XP_008767639	672073609	Nfasc	PREDICTED: neurofascin isoform X14	typeI_membrane	9	Nuclear	2.069	group005
XP_008767640	672073611	Nfasc	PREDICTED: neurofascin isoform X15	typeI_membrane	9	Nuclear	2.051	group005
XP_006249800	564380438	Nfasc	PREDICTED: neurofascin isoform X16	typeII_membrane	9	Nuclear	2.156	group005
XP_008767641	672073614	Nfasc	PREDICTED: neurofascin isoform X17	typeI_membrane	9	Nuclear	1.981	group005
XP_006249803	564380444	Nfasc	PREDICTED: neurofascin isoform X18	multi-pass_membrane	11	Nuclear	2.278	group005
XP_006249804	564380446	Nfasc	PREDICTED: neurofascin isoform X18	multi-pass_membrane	11	Nuclear	2.278	group005
XP_006249808	564380454	Cntn2	PREDICTED: contactin-2 isoform X1	typeI_membrane	9	Chloroplast	1.246	group085
XP_008767649	672073642	Cntn2	PREDICTED: contactin-2 isoform X2	typeI_membrane	9	Chloroplast	1.201	group085
XP_008767707	672073811	Dpp10	PREDICTED: inactive dipeptidyl peptidase 10 isoform X1	soluble_intracellular	0	Nuclear	1.458	group090
XP_006250027	564380987	Brinp3	PREDICTED: BMP/retinoic acid-inducible neural-specific protein 3 isoform X1	typeI_membrane	5	PlasmaMembrane	1.666	group170
XP_008767862	672074417	Astn1	PREDICTED: astrotactin-1 isoform X1	soluble_intracellular	0	Nuclear	3.119	group057
XP_008767863	672074419	Astn1	PREDICTED: astrotactin-1 isoform X2	soluble_intracellular	0	Nuclear	3.174	group057
XP_006250348	564381813	Igsf8	PREDICTED: immunoglobulin superfamily member 8 isoform X2	typeII_membrane	4	Mitochondrial	1.085	group120
XP_006250350	564381817	Igsf8	PREDICTED: immunoglobulin superfamily member 8 isoform X1	typeI_membrane	4	Mitochondrial	1.238	group120
XP_006250351	564381819	Igsf8	PREDICTED: immunoglobulin superfamily member 8 isoform X3	typeII_membrane	3	Mitochondrial	1.504	group120
XP_008768190	672075590	Lphn3	PREDICTED: latrophilin-3 isoform X1	multi-pass_membrane	5	PlasmaMembrane	3.508	group043
XP_008768191	672075592	Lphn3	PREDICTED: latrophilin-3 isoform X2	multi-pass_membrane	5	PlasmaMembrane	3.499	group043
XP_008768192	672075594	Lphn3	PREDICTED: latrophilin-3 isoform X3	multi-pass_membrane	5	PlasmaMembrane	3.49	group043
XP_008768193	672075596	Lphn3	PREDICTED: latrophilin-3 isoform X4	multi-pass_membrane	5	PlasmaMembrane	3.508	group043
XP_008768194	672075598	Lphn3	PREDICTED: latrophilin-3 isoform X5	multi-pass_membrane	5	PlasmaMembrane	3.577	group043
XP_008768195	672075600	Lphn3	PREDICTED: latrophilin-3 isoform X6	multi-pass_membrane	5	PlasmaMembrane	3.514	group043
XP_008768196	672075602	Lphn3	PREDICTED: latrophilin-3 isoform X7	multi-pass_membrane	5	PlasmaMembrane	3.485	group043
XP_008768197	672075604	Lphn3	PREDICTED: latrophilin-3 isoform X8	multi-pass_membrane	5	PlasmaMembrane	3.54	group043
XP_008768198	672075606	Lphn3	PREDICTED: latrophilin-3 isoform X9	multi-pass_membrane	5	PlasmaMembrane	3.591	group043
XP_008768199	672075608	Lphn3	PREDICTED: latrophilin-3 isoform X10	multi-pass_membrane	6	PlasmaMembrane	3.995	group043
XP_008768200	672075610	Lphn3	PREDICTED: latrophilin-3 isoform X11	multi-pass_membrane	5	PlasmaMembrane	3.63	group043
XP_008768201	672075612	Lphn3	PREDICTED: latrophilin-3 isoform X12	multi-pass_membrane	6	PlasmaMembrane	4.04	group043
XP_008768202	672075614	Lphn3	PREDICTED: latrophilin-3 isoform X13	multi-pass_membrane	5	PlasmaMembrane	4.08	group043
XP_008768203	672075616	Lphn3	PREDICTED: latrophilin-3 isoform X14	multi-pass_membrane	5	PlasmaMembrane	4.083	group043
XP_008768204	672075618	Lphn3	PREDICTED: latrophilin-3 isoform X15	multi-pass_membrane	5	PlasmaMembrane	4.079	group043
XP_008768205	672075620	Lphn3	PREDICTED: latrophilin-3 isoform X16	multi-pass_membrane	5	PlasmaMembrane	4.101	group043
XP_008768206	672075622	Lphn3	PREDICTED: latrophilin-3 isoform X17	multi-pass_membrane	5	PlasmaMembrane	4.103	group043
XP_008768207	672075624	Lphn3	PREDICTED: latrophilin-3 isoform X18	multi-pass_membrane	5	PlasmaMembrane	4.439	group043
XP_008768208	672075626	Lphn3	PREDICTED: latrophilin-3 isoform X19	multi-pass_membrane	5	PlasmaMembrane	4.428	group043
XP_006250850	564383189	Slc4a4	PREDICTED: electrogenic sodium bicarbonate cotransporter 1 isoform X1	multi-pass_membrane	3	PlasmaMembrane	3.51	group176
XP_006250851	564383191	Slc4a4	PREDICTED: electrogenic sodium bicarbonate cotransporter 1 isoform X2	multi-pass_membrane	3	PlasmaMembrane	3.732	group176
XP_006250852	564383193	Slc4a4	PREDICTED: electrogenic sodium bicarbonate cotransporter 1 isoform X3	multi-pass_membrane	3	PlasmaMembrane	3.346	group176
XP_006250853	564383195	Slc4a4	PREDICTED: electrogenic sodium bicarbonate cotransporter 1 isoform X4	multi-pass_membrane	3	PlasmaMembrane	3.333	group176
XP_006250993	564383581	Gabra2	PREDICTED: gamma-aminobutyric acid receptor subunit alpha-2 isoform X1	multi-pass_membrane	2	PlasmaMembrane	4.709	group088
XP_008768386	672076238	Atp8a1	PREDICTED: phospholipid-transporting ATPase IA isoform X2	multi-pass_membrane	0	PlasmaMembrane	4.599	group187
XP_006251037	564383679	Atp8a1	PREDICTED: phospholipid-transporting ATPase IA isoform X3	multi-pass_membrane	0	PlasmaMembrane	4.576	group187
XP_006251036	564383677	Atp8a1	PREDICTED: phospholipid-transporting ATPase IA isoform X4	multi-pass_membrane	0	PlasmaMembrane	4.542	group187
XP_006251038	564383681	Atp8a1	PREDICTED: phospholipid-transporting ATPase IA isoform X5	multi-pass_membrane	0	PlasmaMembrane	4.639	group187
XP_006251039	564383683	Atp8a1	PREDICTED: phospholipid-transporting ATPase IA isoform X6	multi-pass_membrane	0	PlasmaMembrane	4.61	group187
XP_006251042	564383689	Atp8a1	PREDICTED: phospholipid-transporting ATPase IA isoform X7	multi-pass_membrane	0	PlasmaMembrane	4.492	group187
XP_008768387	672076245	Atp8a1	PREDICTED: phospholipid-transporting ATPase IA isoform X8	multi-pass_membrane	0	PlasmaMembrane	4.489	group187
XP_006251079	564383807	Pcdh7	PREDICTED: protocadherin-7 isoform X1	multi-pass_membrane	7	Nuclear	3.452	group168
XP_006251134	564383955	Cd38	PREDICTED: ADP-ribosyl cyclase/cyclic ADP-ribose hydrolase 1 isoform X1	typeII_membrane	4	Extracellular	2.947	group122
XP_008768502	672076678	Sorcs2	PREDICTED: VPS10 domain-containing receptor SorCS2 isoform X1	typeII_membrane	6	Extracellular	1.307	group198
XP_008768638	672077143	Egfr	PREDICTED: epidermal growth factor receptor isoform X1	multi-pass_membrane	12	Extracellular	2.078	group223
XP_008768639	672077145	Egfr	PREDICTED: epidermal growth factor receptor isoform X2	multi-pass_membrane	12	Extracellular	1.854	group223
XP_006252156	564386466	Clu	PREDICTED: clusterin isoform X1	soluble_secreted	6	Nuclear	4.069	group159
XP_006252439	564387229	Pcdh17	PREDICTED: protocadherin-17 isoform X1	soluble_secreted	12	Nuclear	3.188	group076
XP_006252440	564387231	Pcdh17	PREDICTED: protocadherin-17 isoform X2	soluble_secreted	12	Nuclear	3.151	group076
XP_006252441	564387233	Pcdh17	PREDICTED: protocadherin-17 isoform X3	soluble_secreted	12	Nuclear	3.117	group076
XP_006252443	564387237	Pcdh17	PREDICTED: protocadherin-17 isoform X4	typeI_membrane	8	Nuclear	2.762	group076
XP_006252848	564388312	Ghitm	PREDICTED: growth hormone-inducible transmembrane protein isoform X1	multi-pass_membrane	0	PlasmaMembrane	4.135	group189
XP_008769466	672080113	Tenm3	PREDICTED: teneurin-3 isoform X1	typeII_membrane	11	Extracellular	1.85	group154
XP_008769467	672080115	Tenm3	PREDICTED: teneurin-3 isoform X2	typeII_membrane	11	Extracellular	1.854	group154
XP_006253177	564389094	Tenm3	PREDICTED: teneurin-3 isoform X3	typeII_membrane	11	Extracellular	1.828	group154
XP_008769545	672080405	Erlin2	PREDICTED: erlin-2 isoform X1	soluble_secreted	1	Cytoplasmic	2.656	group141
XP_008769546	672080407	Erlin2	PREDICTED: erlin-2 isoform X1	soluble_secreted	1	Cytoplasmic	2.656	group141
XP_008769647	672080847	Ntrk2	PREDICTED: BDNF/NT-3 growth factors receptor isoform X1	multi-pass_membrane	1	Extracellular	1.424	group143
XP_008769648	672080849	Ntrk2	PREDICTED: BDNF/NT-3 growth factors receptor isoform X1	multi-pass_membrane	1	Extracellular	1.424	group143
XP_006253569	564390166	Ntrk2	PREDICTED: BDNF/NT-3 growth factors receptor isoform X2	typeI_membrane	9	Extracellular	2.308	group143
XP_008769649	672080852	Ntrk2	PREDICTED: BDNF/NT-3 growth factors receptor isoform X3	typeI_membrane	9	Extracellular	1.899	group143
XP_008769719	672081146	Txndc15	PREDICTED: thioredoxin domain-containing protein 15 isoform X1	typeI_membrane	6	PlasmaMembrane	1.708	group096
XP_006254437	564392540	Ero1lb	PREDICTED: ERO1-like protein beta isoform X1	soluble_intracellular	0	Cytoplasmic	1.722	group037
XP_008770098	672082457	Ero1lb	PREDICTED: ERO1-like protein beta isoform X2	soluble_intracellular	0	Nuclear	3.118	group037
XP_008770152	672082668	Fam171a1	PREDICTED: protein FAM171A1 isoform X4	soluble_secreted	3	Nuclear	3.351	group020
XP_008770309	672083258	Dcc	PREDICTED: netrin receptor DCC isoform X1	typeII_membrane	7	Nuclear	2.723	group050
XP_008770310	672083260	Dcc	PREDICTED: netrin receptor DCC isoform X2	typeII_membrane	7	Nuclear	2.65	group050
XP_006254868	564393676	Pcyox1l	PREDICTED: prenylcysteine oxidase-like isoform X1	soluble_intracellular	0	PlasmaMembrane	2.021	group034
XP_008770393	672083557	Wdr7	PREDICTED: WD repeat-containing protein 7 isoform X1	soluble_intracellular	0	PlasmaMembrane	2.431	group124
XP_006255098	564394339	Tmx3	PREDICTED: protein disulfide-isomerase TMX3 isoform X3	typeI_membrane	0	PlasmaMembrane	2.046	group082
XP_006255121	564394398	Cdh11	PREDICTED: cadherin-11 isoform X1	typeI_membrane	2	Cytoplasmic	2.296	group164
XP_008770486	672084038	Gpr56	PREDICTED: G-protein coupled receptor 56 isoform X2	multi-pass_membrane	6	PlasmaMembrane	4.477	group192
XP_008770487	672084040	Gpr56	PREDICTED: G-protein coupled receptor 56 isoform X2	multi-pass_membrane	6	PlasmaMembrane	4.477	group192
XP_008770488	672084042	Gpr56	PREDICTED: G-protein coupled receptor 56 isoform X1	multi-pass_membrane	6	PlasmaMembrane	4.389	group192
XP_008770489	672084044	Gpr56	PREDICTED: G-protein coupled receptor 56 isoform X1	multi-pass_membrane	6	PlasmaMembrane	4.389	group192
XP_008770490	672084046	Gpr56	PREDICTED: G-protein coupled receptor 56 isoform X1	multi-pass_membrane	6	PlasmaMembrane	4.389	group192
XP_008770491	672084048	Gpr56	PREDICTED: G-protein coupled receptor 56 isoform X1	multi-pass_membrane	6	PlasmaMembrane	4.389	group192
XP_008770492	672084050	Gpr56	PREDICTED: G-protein coupled receptor 56 isoform X1	multi-pass_membrane	6	PlasmaMembrane	4.389	group192
XP_006255128	564394440	Gpr56	PREDICTED: G-protein coupled receptor 56 isoform X1	multi-pass_membrane	6	PlasmaMembrane	4.389	group192
XP_008770896	672085451	RGD1306091	PREDICTED: LOW QUALITY PROTEIN: mitogen-activated protein kinase kinase kinase MLK4 isoform X2	soluble_intracellular	0	Nuclear	3.665	group073
XP_006255909	564396450	RT1-CE10	PREDICTED: RT1 class I, locus CE10 isoform X2	typeI_membrane	2	Mitochondrial	1.62	group219
XP_006255970	564396598	RT1-N3	PREDICTED: RT1 class Ib, locus N3 isoform X1	multi-pass_membrane	2	Cytoplasmic	2.253	group219
XP_006255971	564396600	RT1-N3	PREDICTED: RT1 class Ib, locus N3 isoform X2	multi-pass_membrane	2	Extracellular	1.558	group219
XP_006256161	564397024	RT1-A1	PREDICTED: RT1 class Ia, locus A1 isoform X1	typeI_membrane	2	Extracellular	1.227	group219
XP_006256000	564396658	RT1-N2	PREDICTED: RT1 class Ib, locus N2 isoform X1	multi-pass_membrane	2	Extracellular	1.843	group219
XP_008770970	672085757	RT1-T24-3	PREDICTED: RT1 class I, locus T24, gene 3 isoform X2	soluble_secreted	3	Extracellular	3.13	group219
XP_008770971	672085761	RT1-T24-3	PREDICTED: RT1 class I, locus T24, gene 3 isoform X2	soluble_secreted	3	Extracellular	3.13	group219
XP_008770972	672085765	RT1-T24-3	PREDICTED: RT1 class I, locus T24, gene 3 isoform X3	soluble_intracellular	0	Extracellular	2.469	group219
XP_008770973	672085767	RT1-T24-3	PREDICTED: RT1 class I, locus T24, gene 3 isoform X3	soluble_intracellular	0	Extracellular	2.469	group219
XP_008770974	672085769	RT1-T24-3	PREDICTED: RT1 class I, locus T24, gene 3 isoform X1	soluble_secreted	3	Extracellular	3.926	group219
XP_008770975	672085771	RT1-T24-3	PREDICTED: RT1 class I, locus T24, gene 3 isoform X4	soluble_secreted	1	Extracellular	2.411	group219
XP_008771011	672085904	LOC102546968	PREDICTED: LOW QUALITY PROTEIN: H-2 class I histocompatibility antigen, Q9 alpha chain-like isoform X2	typeII_membrane	2	Mitochondrial	1.74	group219
XP_006256361	564397476	Pofut2	PREDICTED: GDP-fucose protein O-fucosyltransferase 2 isoform X1	soluble_intracellular	0	Mitochondrial	3.067	group004
XP_006256487	564397875	P4ha1	PREDICTED: prolyl 4-hydroxylase subunit alpha-1 isoform X2	soluble_secreted	2	Cytoplasmic	2.077	group059
XP_006256486	564397873	P4ha1	PREDICTED: prolyl 4-hydroxylase subunit alpha-1 isoform X1	soluble_secreted	2	ER	2.106	group059
XP_006256565	564398071	Gja1	PREDICTED: gap junction alpha-1 protein isoform X1	multi-pass_membrane	0	PlasmaMembrane	3.114	group184
XP_003752148	392355834	LOC100909548	PREDICTED: cation-dependent mannose-6-phosphate receptor	typeI_membrane	5	PlasmaMembrane	1.713	group114
XP_006257263	564399895	LOC100909548	PREDICTED: cation-dependent mannose-6-phosphate receptor	typeI_membrane	5	PlasmaMembrane	1.713	group114
XP_006257264	564399897	LOC100909548	PREDICTED: cation-dependent mannose-6-phosphate receptor	typeI_membrane	5	PlasmaMembrane	1.713	group114
XP_006257345	564400084	Arxes2	PREDICTED: signal peptidase complex subunit 3	typeII_membrane	0	PlasmaMembrane	2.022	group203
XP_008771734	672088527	Gria3	PREDICTED: glutamate receptor 3 isoform X4	multi-pass_membrane	4	PlasmaMembrane	3.873	group210
XP_008771754	672088585	Tenm1	PREDICTED: teneurin-1 isoform X2	soluble_intracellular	0	PlasmaMembrane	1.207	group166
XP_008771820	672088848	Plxna3	PREDICTED: plexin-A3 isoform X2	typeII_membrane	8	Extracellular	1.628	group075
XP_008771821	672088850	Plxna3	PREDICTED: plexin-A3 isoform X3	typeII_membrane	7	Extracellular	1.642	group075
XP_006229640	564329410	Plxna3	PREDICTED: plexin-A3 isoform X1	typeI_membrane	8	Nuclear	1.533	group075
XP_006229639	564329408	Plxna3	PREDICTED: plexin-A3 isoform X1	typeI_membrane	8	Nuclear	1.533	group075
XP_008771841	672088934	Atp2b3	PREDICTED: plasma membrane calcium-transporting ATPase 3 isoform X1	multi-pass_membrane	5	PlasmaMembrane	2.917	group107
XP_008771842	672088936	Atp2b3	PREDICTED: plasma membrane calcium-transporting ATPase 3 isoform X2	multi-pass_membrane	5	PlasmaMembrane	2.983	group107
XP_008771843	672088938	Atp2b3	PREDICTED: plasma membrane calcium-transporting ATPase 3 isoform X3	multi-pass_membrane	5	PlasmaMembrane	2.862	group107
XP_008771844	672088940	Atp2b3	PREDICTED: plasma membrane calcium-transporting ATPase 3 isoform X4	multi-pass_membrane	5	PlasmaMembrane	2.948	group107
XP_008771845	672088942	Atp2b3	PREDICTED: plasma membrane calcium-transporting ATPase 3 isoform X5	multi-pass_membrane	5	PlasmaMembrane	2.854	group107
XP_008771846	672088944	Atp2b3	PREDICTED: plasma membrane calcium-transporting ATPase 3 isoform X6	multi-pass_membrane	5	PlasmaMembrane	2.854	group107
XP_008771847	672088946	Atp2b3	PREDICTED: plasma membrane calcium-transporting ATPase 3 isoform X7	multi-pass_membrane	5	PlasmaMembrane	2.812	group107
XP_008771848	672088948	Atp2b3	PREDICTED: plasma membrane calcium-transporting ATPase 3 isoform X8	multi-pass_membrane	5	PlasmaMembrane	2.678	group107
XP_008771849	672088950	Atp2b3	PREDICTED: plasma membrane calcium-transporting ATPase 3 isoform X9	multi-pass_membrane	5	PlasmaMembrane	2.873	group107
XP_008771857	672088982	L1cam	PREDICTED: neural cell adhesion molecule L1 isoform X1	typeI_membrane	18	Nuclear	1.637	group112
XP_008771858	672088984	L1cam	PREDICTED: neural cell adhesion molecule L1 isoform X2	typeI_membrane	18	Nuclear	1.663	group112
XP_008771859	672088986	L1cam	PREDICTED: neural cell adhesion molecule L1 isoform X3	typeI_membrane	18	Nuclear	1.593	group112
XP_008771999	672089498	LOC100909799	PREDICTED: ADP/ATP translocase 3	multi-pass_membrane	0	Mitochondrial	1.551	group110
NP_036638	6978547	Atp1a3	sodium/potassium-transporting ATPase subunit alpha-3	multi-pass_membrane	0	PlasmaMembrane	3.999	group173
NP_036706	6980984	Grin2b	glutamate receptor ionotropic, NMDA 2B precursor	multi-pass_membrane	10	PlasmaMembrane	3.662	group162
NP_036694	158186726	Fuca1	tissue alpha-L-fucosidase precursor	typeI_membrane	2	Lysosomal	4.439	group056
NP_001007647	56090566	Fkbp9	peptidyl-prolyl cis-trans isomerase FKBP9 precursor	typeI_membrane	4	Extracellular	0.933	group209
NP_036878	6981342	Pcsk2	neuroendocrine convertase 2 precursor	soluble_secreted	3	Cytoplasmic	1.313	group078
NP_808794	158341666	Sel1l	protein sel-1 homolog 1 precursor	soluble_secreted	4	Cytoplasmic	1.761	group001
NP_037089	6978869	Gabrb2	gamma-aminobutyric acid receptor subunit beta-2 precursor	multi-pass_membrane	3	PlasmaMembrane	4.851	group169
NP_001007701	56090485	M6pr	cation-dependent mannose-6-phosphate receptor precursor	typeI_membrane	5	PlasmaMembrane	1.713	group114
NP_036973	6978755	Dcc	netrin receptor DCC precursor	multi-pass_membrane	7	Nuclear	2.261	group050
NP_062144	148747550	Hspa13	heat shock 70 kDa protein 13 precursor	typeI_membrane	4	Cytoplasmic	2.23	group130
NP_001094106	158749626	Scamp1	secretory carrier-associated membrane protein 1	multi-pass_membrane	0	PlasmaMembrane	4.326	group031
NP_037016	6981632	Cntn2	contactin-2 precursor	typeI_membrane	9	Chloroplast	1.269	group085
NP_037099	6981068	Icam1	intercellular adhesion molecule 1 precursor	multi-pass_membrane	8	Nuclear	2.171	group047
NP_659553	21489987	Pcyox1	prenylcysteine oxidase precursor	soluble_secreted	3	PlasmaMembrane	2.42	group077
NP_037161	6981540	St8sia3	sia-alpha-2,3-Gal-beta-1,4-GlcNAc-R:alpha 2,8-sialyltransferase	typeII_membrane	3	PlasmaMembrane	2.916	group226
NP_037259	6978629	Cd38	ADP-ribosyl cyclase/cyclic ADP-ribose hydrolase 1	typeII_membrane	4	Extracellular	2.416	group122
NP_037260	6978701	Cpe	carboxypeptidase E precursor	soluble_secreted	2	Cytoplasmic	2.335	group127
NP_062182	9506755	Grik2	glutamate receptor ionotropic, kainate 2 precursor	multi-pass_membrane	9	PlasmaMembrane	4.524	group062
NP_037310	6981512	Scn4a	sodium channel protein type 4 subunit alpha	multi-pass_membrane	3	PlasmaMembrane	4.667	group021
NP_001030105	164519052	Arsa	arylsulfatase A precursor	soluble_secreted	3	Lysosomal	4.09	group008
NP_058708	8393490	Grm5	metabotropic glutamate receptor 5 precursor	multi-pass_membrane	6	PlasmaMembrane	4.493	group063
NP_001101091	164518932	Pofut2	GDP-fucose protein O-fucosyltransferase 2 precursor	soluble_secreted	2	Cytoplasmic	2.898	group004
NP_001100010	164663843	Pigt	GPI transamidase component PIG-T precursor	typeI_membrane	2	Lysosomal	2.454	group218
NP_058761	8393390	Gabrb3	gamma-aminobutyric acid receptor subunit beta-3 precursor	multi-pass_membrane	3	PlasmaMembrane	4.779	group179
NP_058869	8393057	Serpinh1	serpin H1 precursor	soluble_secreted	2	ER	4.087	group165
NP_446269	168823431	Nrxn3	neurexin-3 precursor	typeII_membrane	4	Nuclear	1.417	group048
NP_001102164	157822779	Dnajc11	dnaJ homolog subfamily C member 11	soluble_intracellular	0	Nuclear	1.925	group188
NP_062116	9507007	Ptgfrn	prostaglandin F2 receptor negative regulator precursor	typeI_membrane	5	Nuclear	1.184	group215
NP_001011946	58865470	Hexb	beta-hexosaminidase subunit beta precursor	typeI_membrane	2	Lysosomal	3.44	group006
NP_062145	9507083	Sema4f	semaphorin-4F precursor	typeI_membrane	1	PlasmaMembrane	3.011	group153
NP_062253	9507073	Nptn	neuroplastin precursor	typeI_membrane	5	Nuclear	1.739	group140
NP_064473	9910320	Tenm2	teneurin-2	typeII_membrane	11	Extracellular	1.627	group100
NP_062121	9506939	Ntrk3	NT-3 growth factor receptor isoform 3 precursor	multi-pass_membrane	0	PlasmaMembrane	1.647	group015
NP_001257584	397174820	Ntrk3	NT-3 growth factor receptor isoform 2 precursor	multi-pass_membrane	1	PlasmaMembrane	1.593	group015
NP_001257585	397174822	Ntrk3	NT-3 growth factor receptor isoform 1 precursor	multi-pass_membrane	0	PlasmaMembrane	1.524	group015
NP_001012120	58865810	Naga	alpha-N-acetylgalactosaminidase precursor	soluble_secreted	4	Lysosomal	2.732	group030
NP_067714	11067409	Negr1	neuronal growth regulator 1 precursor	soluble_secreted	5	Extracellular	4.099	group060
NP_001012205	58865978	Dpp10	inactive dipeptidyl peptidase 10	typeII_membrane	9	PlasmaMembrane	2.084	group090
NP_001100168	157821675	H6pd	GDH/6PGL endoplasmic bifunctional protein precursor	soluble_secreted	2	Cytoplasmic	1.626	group202
NP_446279	400153797	Plod1	procollagen-lysine,2-oxoglutarate 5-dioxygenase 1 precursor	soluble_secreted	4	Cytoplasmic	2.037	group157
NP_071514	11559935	Myo5a	unconventional myosin-Va	soluble_intracellular	0	Nuclear	3.402	group224
NP_071526	11990616	Acan	aggrecan core protein precursor	soluble_secreted	7	Nuclear	2.572	group225
NP_001120996	189011606	Nceh1	neutral cholesterol ester hydrolase 1	typeII_membrane	1	PlasmaMembrane	1.711	group074
NP_001257974	402534527	Scn1b	sodium channel subunit beta-1 isoform 1 precursor	typeI_membrane	3	Extracellular	1.485	group138
NP_058984	8394245	Scn1b	sodium channel subunit beta-1 isoform 1 precursor	typeI_membrane	3	Extracellular	1.485	group138
NP_001013100	61556888	Pon2	serum paraoxonase/arylesterase 2	soluble_intracellular	0	Cytoplasmic	1.511	group099
NP_742064	25453372	Spon1	spondin-1 precursor	soluble_secreted	1	Extracellular	3.58	group002
NP_742027	25282445	Entpd2	ectonucleoside triphosphate diphosphohydrolase 2 precursor	multi-pass_membrane	7	PlasmaMembrane	3.429	group121
NP_445774	16758020	Nup210	nuclear pore membrane glycoprotein 210 precursor	typeI_membrane	12	PlasmaMembrane	1.841	group035
NP_001015021	62543491	Dnajb11	dnaJ homolog subfamily B member 11 precursor	typeI_membrane	1	Cytoplasmic	3.365	group137
NP_074041	12408298	Dpp6	dipeptidyl aminopeptidase-like protein 6	typeII_membrane	6	Cytoplasmic	1.54	group090
NP_001100594	157820133	Ttyh3	protein tweety homolog 3	multi-pass_membrane	3	PlasmaMembrane	4.14	group204
NP_446423	162287391	Rpl6	60S ribosomal protein L6	soluble_intracellular	0	Nuclear	2.859	group227
NP_001128014	197384556	Pcyox1l	prenylcysteine oxidase-like precursor	soluble_secreted	5	PlasmaMembrane	2.476	group034
NP_059055	61889071	Rab10	ras-related protein Rab-10	soluble_intracellular	0	Cytoplasmic	2.924	group009
NP_001128006	197385182	Btbd17	BTB/POZ domain-containing protein 17 precursor	soluble_secreted	4	PlasmaMembrane	1.683	group163
NP_476459	16923964	Cntn1	contactin-1 precursor	soluble_secreted	9	PlasmaMembrane	1.207	group010
NP_598220	19424194	Rab3c	ras-related protein Rab-3C	soluble_intracellular	0	Cytoplasmic	1.641	group064
NP_113937	13994184	Gcs1	mannosyl-oligosaccharide glucosidase	typeII_membrane	1	Mitochondrial	1.473	group053
NP_077354	13259380	Grid1	glutamate receptor ionotropic, delta-1 precursor	multi-pass_membrane	3	PlasmaMembrane	3.71	group109
NP_110469	57528941	Itga7	integrin alpha-7 precursor	multi-pass_membrane	4	Cytoplasmic	1.434	group123
NP_445859	40254747	Asah1	acid ceramidase precursor	soluble_secreted	3	Lysosomal	4.209	group178
NP_001100902	157818225	Cntnap4	contactin-associated protein-like 4 precursor	typeI_membrane	11	Extracellular	1.871	group092
NP_113695	25742617	Egfr	epidermal growth factor receptor precursor	multi-pass_membrane	12	Extracellular	2.228	group223
NP_001035276	93277126	Mfge8	lactadherin isoform 1 precursor	soluble_secreted	2	Extracellular	2.954	group131
NP_036943	6981200	Mfge8	lactadherin isoform 2 precursor	soluble_secreted	2	Extracellular	3.484	group131
NP_001099804	157822919	Ganab	neutral alpha-glucosidase AB	soluble_intracellular	0	Lysosomal	1.274	group101
NP_113729	13928730	Scarb1	scavenger receptor class B member 1	multi-pass_membrane	9	PlasmaMembrane	2.067	group213
NP_113796	29789269	Gria1	glutamate receptor 1 precursor	multi-pass_membrane	6	PlasmaMembrane	4.458	group039
NP_569107	208973252	Ggt7	gamma-glutamyltransferase 7	typeII_membrane	6	Cytoplasmic	1.723	group081
NP_445928	209870039	Synj1	synaptojanin-1	soluble_intracellular	0	Nuclear	2.355	group185
NP_001029175	77735352	Apmap	adipocyte plasma membrane-associated protein precursor	soluble_secreted	1	Cytoplasmic	1.08	group148
NP_001014772	62339281	Adam9	disintegrin and metalloproteinase domain-containing protein 9 precursor	typeI_membrane	5	Extracellular	2.532	group119
NP_001014787	62339335	Igsf8	immunoglobulin superfamily member 8 precursor	typeI_membrane	4	Mitochondrial	1.238	group120
NP_001101153	157818529	Slitrk3	SLIT and NTRK-like protein 3 precursor	multi-pass_membrane	6	Nuclear	1.649	group134
NP_001101347	157823509	Adamts9	A disintegrin and metalloproteinase with thrombospondin motifs 9 precursor	soluble_secreted	9	Extracellular	3.006	group098
NP_001019485	66730294	Abhd12	monoacylglycerol lipase ABHD12	typeII_membrane	1	Mitochondrial	1.842	group118
NP_445876	16758164	Slc4a4	electrogenic sodium bicarbonate cotransporter 1	multi-pass_membrane	3	PlasmaMembrane	3.615	group176
NP_113740	255759898	Add3	gamma-adducin isoform 2	soluble_intracellular	0	Nuclear	2.998	group196
NP_001157575	255759900	Add3	gamma-adducin isoform 1	soluble_intracellular	0	Nuclear	3.288	group196
NP_445967	32189355	Slc25a4	ADP/ATP translocase 1	multi-pass_membrane	0	Mitochondrial	1.97	group110
NP_001101494	157820049	Lrfn5	leucine-rich repeat and fibronectin type-III domain-containing protein 5 precursor	typeI_membrane	6	PlasmaMembrane	2.172	group108
NP_446041	16758368	Rab14	ras-related protein Rab-14	soluble_intracellular	0	Cytoplasmic	2.189	group136
NP_001101623	209863068	Sema7a	semaphorin-7A precursor	typeI_membrane	4	Extracellular	2.358	group133
NP_001101662	157824103	Glb1	beta-galactosidase precursor	soluble_secreted	7	Lysosomal	3.826	group011
NP_446171	16758534	Emb	embigin precursor	typeI_membrane	8	Extracellular	2.049	group139
NP_001159875	261862309	RT1-T24-3	RT1 class I, locus T24, gene 3	soluble_secreted	3	Extracellular	3.926	group219
NP_001101710	157817931	Clptm1l	cleft lip and palate transmembrane protein 1-like protein	multi-pass_membrane	0	PlasmaMembrane	3.763	group152
NP_001008826	77404170	RT1-T24-4	RT1 class I, locus T24, gene 4	typeII_membrane	3	Extracellular	3.309	group219
NP_001008855	57012390	RT1-N3	RT1 class Ib, locus N3	multi-pass_membrane	2	Extracellular	1.888	group219
NP_001020169	68163437	Txndc15	thioredoxin domain-containing protein 15 precursor	typeI_membrane	6	PlasmaMembrane	1.725	group096
NP_001161312	268607708	Il1rap	interleukin-1 receptor accessory protein isoform b precursor	typeI_membrane	1	PlasmaMembrane	2.023	group115
NP_001008843	57114336	RT1-CE5	RT1 class I, locus CE5 isoform 1 precursor	typeI_membrane	2	Mitochondrial	1.127	group219
NP_073203	281306746	Tfrc	transferrin receptor protein 1	typeII_membrane	5	PlasmaMembrane	1.48	group142
NP_001094122	281332155	Poglut1	protein O-glucosyltransferase 1 precursor	soluble_secreted	3	Mitochondrial	1.631	group027
NP_001164010	281485606	Stt3b	dolichyl-diphosphooligosaccharide--protein glycosyltransferase subunit STT3B	multi-pass_membrane	3	PlasmaMembrane	4.711	group172
NP_476443	32189350	Slc25a5	ADP/ATP translocase 2	multi-pass_membrane	1	Mitochondrial	1.558	group110
NP_001101954	157816949	Nomo1	nodal modulator 1 precursor	soluble_secreted	5	PlasmaMembrane	1.514	group022
NP_001123962	283837871	Lrp1	prolow-density lipoprotein receptor-related protein 1 precursor	soluble_secreted	22	Extracellular	3.041	group167
NP_001102160	157822661	Emc1	ER membrane protein complex subunit 1 precursor	soluble_secreted	3	PlasmaMembrane	1.698	group084
NP_036805	6981654	Thy1	thy-1 membrane glycoprotein preproprotein	soluble_secreted	3	Extracellular	3.362	group208
NP_579823	18959222	Scn9a	sodium channel protein type 9 subunit alpha	multi-pass_membrane	5	PlasmaMembrane	4.399	group021
NP_596874	19173736	Scpep1	retinoid-inducible serine carboxypeptidase precursor	typeI_membrane	5	Lysosomal	1.593	group054
NP_001102229	157817061	Siae	sialate O-acetylesterase precursor	soluble_secreted	8	Lysosomal	2.058	group220
NP_598280	19424302	Uggt1	UDP-glucose:glycoprotein glucosyltransferase 1 precursor	soluble_secreted	3	Cytoplasmic	1.913	group019
NP_899155	34328532	Gabra1	gamma-aminobutyric acid receptor subunit alpha-1 precursor	multi-pass_membrane	2	PlasmaMembrane	4.23	group088
NP_599183	29789369	Ptprg	receptor-type tyrosine-protein phosphatase gamma	typeII_membrane	5	Nuclear	1.669	group055
NP_599190	19705463	Slc12a5	solute carrier family 12 member 5	multi-pass_membrane	9	PlasmaMembrane	4.121	group079
NP_001028837	75992948	Bcan	brevican core protein isoform 1 precursor	soluble_secreted	2	Nuclear	1.537	group087
NP_446177	387157899	Itga6	integrin alpha-6 precursor	typeI_membrane	6	Nuclear	1.4	group032
NP_665720	21955259	Olfm3	noelin-3 precursor	soluble_secreted	5	Nuclear	1.312	group200
NP_001029158	77404174	RT1-CE5	RT1 class I, locus CE5 isoform 2 precursor	typeI_membrane	2	PlasmaMembrane	1.146	group219
NP_001029157	77404172	RT1-CE14	RT1 class I, locus CE14 isoform 2	typeI_membrane	2	Cytoplasmic	1.852	group219
NP_076473	77176452	Mcam	cell surface glycoprotein MUC18 isoform 1 precursor	typeI_membrane	6	Nuclear	2.212	group007
NP_001029181	77176454	Mcam	cell surface glycoprotein MUC18 isoform 2 precursor	typeI_membrane	6	Nuclear	1.757	group007
NP_620222	77404380	Hyou1	hypoxia up-regulated protein 1 precursor	typeI_membrane	5	Cytoplasmic	2.795	group182
NP_001029200	77404375	Hyou1	hypoxia up-regulated protein 1 precursor	typeI_membrane	5	Cytoplasmic	2.795	group182
NP_775144	27465571	Brinp3	BMP/retinoic acid-inducible neural-specific protein 3 precursor	typeI_membrane	5	PlasmaMembrane	1.666	group170
NP_001030099	110626131	Sulf2	extracellular sulfatase Sulf-2 precursor	typeI_membrane	11	Nuclear	2.301	group180
NP_254278	77993374	Arsb	arylsulfatase B precursor	soluble_secreted	5	Lysosomal	4.693	group033
NP_783182	28212250	Cacna2d2	voltage-dependent calcium channel subunit alpha-2/delta-2 precursor	soluble_intracellular	0	PlasmaMembrane	1.051	group061
NP_835196	30017417	Abca1	ATP-binding cassette sub-family A member 1	multi-pass_membrane	11	PlasmaMembrane	3.008	group195
NP_001041316	114145565	Galns	N-acetylgalactosamine-6-sulfatase precursor	typeI_membrane	2	Lysosomal	4.159	group106
NP_001103100	157820121	Slc12a6	solute carrier family 12 member 6	multi-pass_membrane	5	PlasmaMembrane	4.704	group079
NP_071562	31543514	Lgmn	legumain precursor	soluble_secreted	5	Extracellular	1.707	group068
NP_536319	31543579	Reln	reelin precursor	typeI_membrane	14	Extracellular	2.247	group183
NP_036699	6978896	Gja1	gap junction alpha-1 protein	multi-pass_membrane	0	PlasmaMembrane	3.114	group184
NP_899156	34328527	Gabrg2	gamma-aminobutyric acid receptor subunit gamma-2 precursor	multi-pass_membrane	3	PlasmaMembrane	4.771	group177
NP_908939	42491372	Ermp1	endoplasmic reticulum metallopeptidase 1	multi-pass_membrane	1	PlasmaMembrane	4.817	group012
NP_068535	37620151	Nrxn1	neurexin 1 precursor	typeI_membrane	5	Nuclear	1.384	group042
NP_954890	40538872	Mdga2	MAM domain-containing glycosylphosphatidylinositol anchor protein 2 precursor	typeI_membrane	8	PlasmaMembrane	1.701	group149
NP_973719	42538976	Pgap1	GPI inositol-deacylase	multi-pass_membrane	4	PlasmaMembrane	4.658	group186
NP_476533	17105334	Folh1	glutamate carboxypeptidase 2	typeII_membrane	8	Cytoplasmic	1.314	group105
NP_599161	42476045	Ctsd	cathepsin D precursor	typeI_membrane	2	Lysosomal	4.046	group171
NP_001102196	157817947	Itgb8	integrin beta-8	typeII_membrane	4	Extracellular	3.211	group146
NP_444180	46048420	Clu	clusterin precursor	soluble_secreted	6	Nuclear	3.883	group159
NP_001073408	121583776	Lmf2	lipase maturation factor 2	multi-pass_membrane	2	PlasmaMembrane	3.926	group147
NP_001008829	57012342	RT1-A2	RT1 class Ia, locus A2 precursor	typeI_membrane	2	Extracellular	1.606	group219
NP_116004	47575864	Gde1	glycerophosphodiester phosphodiesterase 1	soluble_intracellular	0	PlasmaMembrane	1.726	group024
NP_036639	56799390	Atp1b2	sodium/potassium-transporting ATPase subunit beta-2	typeII_membrane	5	Extracellular	1.911	group046
NP_001008837	57012384	RT1-CE14	RT1 class I, locus CE14 isoform 1 precursor	typeI_membrane	2	Cytoplasmic	1.823	group219
NP_714957	24308510	Nptx1	neuronal pentraxin-1 precursor	soluble_secreted	2	Cytoplasmic	1.273	group211
NP_036705	140971205	Grin2a	glutamate receptor ionotropic, NMDA 2A precursor	multi-pass_membrane	12	PlasmaMembrane	3.693	group049
NP_001008840	57012402	RT1-CE2	RT1 class I, locus CE2 precursor	typeI_membrane	2	Extracellular	1.333	group219
NP_001008836	57012416	RT1-CE13	RT1 class I, locus CE13 precursor	typeI_membrane	2	Extracellular	1.477	group219
NP_001008833	57012420	RT1-CE10	RT1 class I, locus CE10 precursor	typeI_membrane	2	Mitochondrial	1.496	group219
NP_001008827	57012424	RT1-A1	RT1 class Ia, locus A1 precursor	typeI_membrane	2	Extracellular	1.259	group219
NP_001008839	57012426	RT1-CE16	RT1 class I, locus CE16 precursor	typeI_membrane	2	PlasmaMembrane	0.977	group219
NP_742059	51036657	P4ha1	prolyl 4-hydroxylase subunit alpha-1 precursor	soluble_secreted	2	ER	2.106	group059
NP_631928	51036677	Lmbrd1	probable lysosomal cobalamin transporter	multi-pass_membrane	6	PlasmaMembrane	4.945	group144
NP_001004087	51854233	Pcdh7	protocadherin-7 precursor	multi-pass_membrane	7	Nuclear	3.387	group168
NP_001004218	51948408	Fuca2	plasma alpha-L-fucosidase precursor	soluble_secreted	2	Lysosomal	3.716	group069
NP_001004240	51948452	Gpaa1	glycosylphosphatidylinositol anchor attachment 1 protein	multi-pass_membrane	1	PlasmaMembrane	4.495	group221
NP_001004248	51948472	Tmem30a	cell cycle control protein 50A	multi-pass_membrane	4	PlasmaMembrane	2.123	group026
NP_001004267	51948502	Tmem106b	transmembrane protein 106B	typeII_membrane	4	Nuclear	1.658	group199
NP_037189	52138595	F3	tissue factor precursor	multi-pass_membrane	5	PlasmaMembrane	2.011	group086
NP_001004443	52138739	Hexa	beta-hexosaminidase subunit alpha precursor	typeI_membrane	5	Lysosomal	3.955	group023
NP_001005908	54400718	Ghitm	growth hormone-inducible transmembrane protein	multi-pass_membrane	0	PlasmaMembrane	4.135	group189
NP_001006602	54633340	Pigs	GPI transamidase component PIG-S	multi-pass_membrane	2	PlasmaMembrane	1.428	group029
NP_062068	9506469	Cd47	leukocyte surface antigen CD47 precursor	multi-pass_membrane	5	PlasmaMembrane	4.448	group095
NP_001101051	164518900	Plxna3	plexin-A3 precursor	typeI_membrane	8	Nuclear	1.533	group075
NP_036779	6981506	Scn2a	sodium channel protein type 2 subunit alpha	multi-pass_membrane	7	PlasmaMembrane	4.49	group021
NP_001102441	157822809	RGD1309821	uncharacterized family 31 glucosidase KIAA1161 homolog	typeII_membrane	5	PlasmaMembrane	1.11	group216
NP_001094180	213511844	Alg2	alpha-1,3/1,6-mannosyltransferase ALG2	soluble_intracellular	0	Cytoplasmic	1.723	group129
NP_001099702	157819501	Clptm1	cleft lip and palate transmembrane protein 1	multi-pass_membrane	6	PlasmaMembrane	3.15	group174
NP_001099383	157786876	Elfn1	protein ELFN1 precursor	typeI_membrane	8	Nuclear	1.72	group044
NP_037251	6981510	Scn3a	sodium channel protein type 3 subunit alpha	multi-pass_membrane	6	PlasmaMembrane	4.76	group021
NP_001005898	226874871	Omg	oligodendrocyte-myelin glycoprotein precursor	typeI_membrane	6	Extracellular	3.085	group066
NP_579822	158138481	Atp2b3	plasma membrane calcium-transporting ATPase 3	multi-pass_membrane	5	PlasmaMembrane	2.91	group107
NP_001101611	157822543	Dscaml1	Down syndrome cell adhesion molecule-like protein 1	soluble_intracellular	0	Nuclear	2.14	group103
NP_113973	13929110	Atp6ap1	V-type proton ATPase subunit S1 precursor	multi-pass_membrane	7	PlasmaMembrane	4.094	group089
NP_001020283	68341983	Wbscr17	putative polypeptide N-acetylgalactosaminyltransferase-like protein 3	typeII_membrane	3	Mitochondrial	1.728	group072
NP_001128221	197927176	Stt3a	dolichyl-diphosphooligosaccharide--protein glycosyltransferase subunit STT3A	multi-pass_membrane	0	PlasmaMembrane	4.95	group097
NP_001104584	163659909	Grik1	glutamate receptor ionotropic, kainate 1 isoform 3	multi-pass_membrane	9	PlasmaMembrane	4.498	group062
NP_058957	8393475	Gria2	glutamate receptor 2 isoform 1 precursor	multi-pass_membrane	4	PlasmaMembrane	4.376	group113
NP_001153785	237858625	Nfasc	neurofascin isoform 2 precursor	multi-pass_membrane	8	Nuclear	2.675	group005
NP_116785	163792203	Gria3	glutamate receptor 3 isoform 1 precursor	multi-pass_membrane	4	PlasmaMembrane	4.352	group210
NP_001106213	163792205	Gria3	glutamate receptor 3 isoform 2 precursor	multi-pass_membrane	4	PlasmaMembrane	4.358	group210
NP_001257537	396578157	Grin1	glutamate receptor ionotropic, NMDA 1 isoform 4b precursor	multi-pass_membrane	10	PlasmaMembrane	3.397	group175
NP_001121166	189163475	Lrfn1	leucine-rich repeat and fibronectin type III domain-containing protein 1 isoform 1 precursor	typeI_membrane	3	PlasmaMembrane	3.554	group036
NP_001073849	122891854	Tmem30b	cell cycle control protein 50B	multi-pass_membrane	5	PlasmaMembrane	1.954	group026
NP_001178557	300798434	Tenm4	teneurin-4	typeII_membrane	13	Extracellular	1.627	group166
NP_058937	8393481	Grik1	glutamate receptor ionotropic, kainate 1 isoform 2	multi-pass_membrane	9	PlasmaMembrane	4.45	group062
NP_001182206	305632805	Tmem178b	transmembrane protein 178B precursor	multi-pass_membrane	3	PlasmaMembrane	4.389	group222
NP_001257975	402534531	Scn1b	sodium channel subunit beta-1 isoform 2	typeII_membrane	3	Cytoplasmic	1.377	group138
NP_001165550	285026497	Icam5	intercellular adhesion molecule 5	multi-pass_membrane	12	PlasmaMembrane	1.613	group003
NP_062127	402794619	Adam10	disintegrin and metalloproteinase domain-containing protein 10 precursor	typeI_membrane	4	Nuclear	1.902	group017
NP_001153787	237858627	Nfasc	neurofascin isoform 4 precursor	multi-pass_membrane	8	Nuclear	2.536	group005
NP_001101229	299829287	Disp2	protein dispatched homolog 2	multi-pass_membrane	3	PlasmaMembrane	3.592	group207
NP_001001508	325197225	Lppr4	lipid phosphate phosphatase-related protein type 4	multi-pass_membrane	5	Nuclear	1.796	group028
NP_001012078	403224995	Sema4a	semaphorin-4A precursor	typeI_membrane	3	PlasmaMembrane	1.545	group025
NP_037048	75992946	Bcan	brevican core protein isoform 2 precursor	soluble_secreted	2	Nuclear	1.347	group087
NP_113955	209954677	Sort1	sortilin precursor	typeI_membrane	5	PlasmaMembrane	1.546	group117
NP_001104587	163659911	Grik1	glutamate receptor ionotropic, kainate 1 isoform 1	multi-pass_membrane	9	PlasmaMembrane	4.36	group062
NP_001077280	139394534	Gria2	glutamate receptor 2 isoform 2 precursor	multi-pass_membrane	4	PlasmaMembrane	4.413	group113
NP_001257539	396578159	Grin1	glutamate receptor ionotropic, NMDA 1 isoform 4a precursor	multi-pass_membrane	10	PlasmaMembrane	3.667	group175
NP_001178550	300798289	Map3k10	mitogen-activated protein kinase kinase kinase 10	soluble_intracellular	0	Nuclear	2.433	group073
NP_036637	6978545	Atp1a2	sodium/potassium-transporting ATPase subunit alpha-2 precursor	multi-pass_membrane	0	PlasmaMembrane	4.039	group190
NP_001178492	300797077	Sorcs1	VPS10 domain-containing receptor SorCS1 precursor	typeI_membrane	8	PlasmaMembrane	2.163	group217
NP_445923	16758220	Sema6b	semaphorin-6B precursor	typeI_membrane	6	PlasmaMembrane	2.744	group158
NP_445844	281427192	Cdh11	cadherin-11	typeI_membrane	2	Cytoplasmic	2.296	group164
NP_446361	19924211	Nfasc	neurofascin isoform 3 precursor	multi-pass_membrane	8	Nuclear	2.613	group005
NP_036863	6981294	Ntrk2	BDNF/NT-3 growth factors receptor isoform 1 precursor	multi-pass_membrane	1	Extracellular	1.382	group143
NP_001094342	403224991	Map3k9	mitogen-activated protein kinase kinase kinase 9	soluble_intracellular	0	Nuclear	3.445	group073
NP_001034788	161760638	Lrfn2	leucine-rich repeat and fibronectin type-III domain-containing protein 2 precursor	typeI_membrane	6	PlasmaMembrane	2.158	group150
NP_110468	36054040	Nptxr	neuronal pentraxin receptor	typeII_membrane	3	Cytoplasmic	1.264	group126
NP_852038	163659913	Grik3	glutamate receptor ionotropic, kainate 3 isoform 2 precursor	multi-pass_membrane	10	PlasmaMembrane	4.188	group194
NP_001153786	237858623	Nfasc	neurofascin isoform 1 precursor	multi-pass_membrane	10	Nuclear	2.026	group005
NP_001162103	274323760	Ptprm	receptor-type tyrosine-protein phosphatase mu precursor	typeI_membrane	10	PlasmaMembrane	1.403	group201
NP_001099751	166064014	Prcp	lysosomal Pro-X carboxypeptidase precursor	soluble_secreted	4	Lysosomal	3.574	group016
NP_001106187	163659915	Grik3	glutamate receptor ionotropic, kainate 3 isoform 1 precursor	multi-pass_membrane	10	PlasmaMembrane	4.551	group194
NP_001099458	310688889	Plxna2	plexin-A2	typeI_membrane	15	PlasmaMembrane	1.697	group075
NP_001162604	281306744	Tenm3	teneurin-3	typeII_membrane	11	Extracellular	1.838	group154
NP_001164034	281604106	Sema4d	semaphorin-4D precursor	typeI_membrane	6	Extracellular	1.585	group051
NP_001099868	157822793	Mcu	calcium uniporter protein, mitochondrial precursor	multi-pass_membrane	0	Mitochondrial	2.396	group181
NP_036777	6981494	RT1-EC2	class I histocompatibility antigen, Non-RT1.A alpha-1 chain precursor	soluble_secreted	2	Extracellular	2.487	group219
NP_001163933	281427160	Sema4b	semaphorin-4B precursor	typeI_membrane	7	Extracellular	2.011	group045
NP_001094192	213688408	Lingo1	leucine-rich repeat and immunoglobulin-like domain-containing nogo receptor-interacting protein 1 precursor	typeI_membrane	8	PlasmaMembrane	2.457	group102
NP_001164074	282158057	Astn1	astrotactin-1 precursor	multi-pass_membrane	7	Nuclear	3.006	group057
NP_001258292	405113055	Astn2	astrotactin-2 precursor	multi-pass_membrane	5	Nuclear	1.993	group116
NP_001102290	348605144	Gla	alpha-galactosidase A	soluble_intracellular	0	Lysosomal	4.206	group132
NP_671480	158517933	Itgb5	integrin beta-5 precursor	typeI_membrane	5	Extracellular	3.705	group145
NP_037212	283046651	Ptprz1	receptor-type tyrosine-protein phosphatase zeta isoform 1 precursor	typeI_membrane	16	Nuclear	3.23	group197
NP_076465	13027430	Wdr7	WD repeat-containing protein 7	soluble_intracellular	0	PlasmaMembrane	2.431	group124
NP_001164156	283046647	Ptprz1	receptor-type tyrosine-protein phosphatase zeta isoform 2 precursor	soluble_secreted	16	Nuclear	3.298	group197
NP_001008854	113865837	RT1-N2	RT1 class Ib, locus N2 precursor	multi-pass_membrane	2	Extracellular	1.843	group219
NP_037199	752993193	Rpn1	dolichyl-diphosphooligosaccharide--protein glycosyltransferase subunit 1 precursor	typeI_membrane	2	Cytoplasmic	0.976	group125
NP_037056	19923703	Cd44	CD44 antigen precursor	typeI_membrane	10	Nuclear	1.921	group080
NP_689448	158711727	Adgrg1	G-protein coupled receptor 56 precursor	multi-pass_membrane	6	PlasmaMembrane	4.389	group192
NP_570835	18677755	Adgrl3	latrophilin-3 precursor	multi-pass_membrane	5	PlasmaMembrane	3.589	group043
NP_075251	12621148	Adgrl1	latrophilin-1 precursor	multi-pass_membrane	7	PlasmaMembrane	3.432	group013
NP_059041	8393820	L1cam	neural cell adhesion molecule L1 precursor	typeI_membrane	16	Nuclear	1.471	group112
NP_062156	402743472	Slc3a2	4F2 cell-surface antigen heavy chain isoform 1	typeII_membrane	7	Cytoplasmic	1.678	group212
NP_001099558	157823984	Erlin2	erlin-2	soluble_secreted	1	Cytoplasmic	2.656	group141
NP_001100972	157819369	Lrfn3	leucine-rich repeat and fibronectin type-III domain-containing protein 3 precursor	typeI_membrane	5	PlasmaMembrane	2.492	group160
NP_036968	6978699	Cpd	carboxypeptidase D precursor	typeI_membrane	11	Cytoplasmic	1.395	group040
NP_001258018	402743833	Slc3a2	4F2 cell-surface antigen heavy chain isoform 2	typeII_membrane	8	Extracellular	1.501	group212
NP_997475	46485440	Gpi	glucose-6-phosphate isomerase	soluble_intracellular	0	Cytoplasmic	3.157	group206
NP_001012197	210032365	Hsp90b1	endoplasmin precursor	soluble_secreted	5	ER	3.753	group135
NP_001030100	77917546	Immt	MICOS complex subunit Mic60	soluble_intracellular	0	Cytoplasmic	1.719	group093
NP_001177404	694874500	Adgrl2	adhesion G protein-coupled receptor L2 isoform 2 precursor	multi-pass_membrane	8	PlasmaMembrane	4.299	group018
NP_001289137	694871014	Adgrl2	adhesion G protein-coupled receptor L2 isoform 3 precursor	multi-pass_membrane	8	PlasmaMembrane	4.315	group018
NP_599235	694879431	Adgrl2	adhesion G protein-coupled receptor L2 isoform 1 precursor	multi-pass_membrane	8	PlasmaMembrane	4.283	group018
NP_001289141	694879429	Adgrl2	adhesion G protein-coupled receptor L2 isoform 7 precursor	multi-pass_membrane	8	PlasmaMembrane	4.303	group018
NP_001289138	694874778	Adgrl2	adhesion G protein-coupled receptor L2 isoform 4 precursor	multi-pass_membrane	8	PlasmaMembrane	4.346	group018
NP_001289139	694868520	Adgrl2	adhesion G protein-coupled receptor L2 isoform 5 precursor	multi-pass_membrane	8	PlasmaMembrane	4.361	group018
NP_001289140	694878102	Adgrl2	adhesion G protein-coupled receptor L2 isoform 6 precursor	multi-pass_membrane	8	PlasmaMembrane	4.325	group018
NP_612537	19924061	Ero1a	ERO1-like protein alpha precursor	soluble_secreted	2	Cytoplasmic	2.162	group037
NP_071524	11559953	Robo1	roundabout homolog 1 precursor	soluble_secreted	12	Nuclear	3.794	group193
NP_115289	281332151	Robo2	roundabout homolog 2 precursor	typeI_membrane	6	Nuclear	3.751	group111
NP_058699	77020289	Erbb2	receptor tyrosine-protein kinase erbB-2 precursor	multi-pass_membrane	7	Extracellular	1.538	group073
NP_067719	11067415	Erbb4	receptor tyrosine-protein kinase erbB-4 precursor	typeI_membrane	11	Extracellular	1.881	group073
NP_001128173	197927431	RT1-A	RT1 class I, locus A precursor	typeI_membrane	2	Cytoplasmic	1.401	group219
NP_001102122	157821545	Fam234b	uncharacterized protein KIAA1467 homolog	typeII_membrane	5	PlasmaMembrane	1.281	group191
NP_001100695	170014691	Sorcs2	VPS10 domain receptor protein SORCS 2 precursor	typeI_membrane	7	Extracellular	1.486	group198
NP_001102380	157817516	Lrfn1	leucine-rich repeat and fibronectin type III domain-containing protein 1 isoform 2 precursor	soluble_secreted	3	Extracellular	1.426	group036
NP_001129251	209413778	Gabra2	gamma-aminobutyric acid receptor subunit alpha-2 precursor	multi-pass_membrane	2	PlasmaMembrane	4.687	group088
NP_599231	72534840	Svop	synaptic vesicle 2-related protein	multi-pass_membrane	0	PlasmaMembrane	4.887	group214
NP_996730	47777291	RT1-Cl	RT1 class Ib, locus Cl precursor	typeI_membrane	2	Extracellular	1.537	group219
NP_036778	6981492	RT1-N1	RT1 class Ib, locus N1 precursor	multi-pass_membrane	2	Extracellular	2.461	group219
NP_001100749	157822363	Pcdh17	protocadherin-17 precursor	soluble_secreted	12	Nuclear	3.494	group076
NP_001101396	157817446	Lingo2	leucine-rich repeat and immunoglobulin-like domain-containing nogo receptor-interacting protein 2 precursor	typeI_membrane	8	PlasmaMembrane	1.891	group151
NP_981954	42821116	Ncam2	neural cell adhesion molecule 2 precursor	typeI_membrane	5	Cytoplasmic	2.211	group052

## Sheet: E
Supplementary file 1E. Gene-ontology (function) of core-glycosylated surface proteins vesus total prtoeins or versus total predicted N-glycosylated proteins
Total Proteins	top 25 terms
Goid	Term	GO Class	(x,M,K,n)	pValue	FDR qValue	Fold Change
GO:0005234	extracellular-glutamate-gated ion channel activity	molecular_function	(12,6872,13,268)	3.6324e-19	1.4488e-17	23.6693
GO:0004970	ionotropic glutamate receptor activity	molecular_function	(12,6872,12,268)	9.7337e-18	3.2353e-16	25.6418
GO:0042605	peptide antigen binding	molecular_function	(12,6872,17,268)	7.5118e-16	1.4981e-14	18.1001
GO:0005102	receptor binding	molecular_function	(23,6872,164,268)	1.6195e-08	1.468e-07	3.5961
GO:0004890	GABA-A receptor activity	molecular_function	(6,6872,11,268)	3.6657e-08	2.8117e-07	13.9864
GO:0008239	dipeptidyl-peptidase activity	molecular_function	(4,6872,5,268)	8.7015e-08	4.9748e-07	20.5134
GO:0015277	kainate selective glutamate receptor activity	molecular_function	(5,6872,5,268)	8.7015e-08	4.9748e-07	25.6418
GO:0005254	chloride channel activity	molecular_function	(7,6872,19,268)	2.5086e-07	1.1751e-06	9.447
GO:0030246	carbohydrate binding	molecular_function	(13,6872,69,268)	3.0216e-07	1.3695e-06	4.8311
GO:0005391	sodium:potassium-exchanging ATPase activity	molecular_function	(5,6872,10,268)	6.1275e-07	2.4939e-06	12.8209
GO:0005178	integrin binding	molecular_function	(11,6872,56,268)	1.1661e-06	4.3063e-06	5.0368
GO:0038191	neuropilin binding	molecular_function	(4,6872,7,268)	1.7126e-06	5.2544e-06	14.6525
GO:0004972	NMDA glutamate receptor activity	molecular_function	(3,6872,4,268)	2.2637e-06	6.2701e-06	19.2313
GO:0008375	acetylglucosaminyltransferase activity	molecular_function	(3,6872,4,268)	2.2637e-06	6.2701e-06	19.2313
GO:0004971	AMPA glutamate receptor activity	molecular_function	(5,6872,4,268)	2.2637e-06	6.2701e-06	25.6418
GO:0005246	calcium channel regulator activity	molecular_function	(6,6872,18,268)	2.7916e-06	7.3254e-06	8.5473
GO:0004185	serine-type carboxypeptidase activity	molecular_function	(4,6872,8,268)	4.4214e-06	1.0886e-05	12.8209
GO:0031489	myosin V binding	molecular_function	(5,6872,14,268)	7.6743e-06	1.7392e-05	9.1578
GO:0004714	transmembrane receptor protein tyrosine kinase activity	molecular_function	(5,6872,14,268)	7.6743e-06	1.7392e-05	9.1578
GO:0005248	voltage-gated sodium channel activity	molecular_function	(5,6872,14,268)	7.6743e-06	1.7392e-05	9.1578
GO:0030215	semaphorin receptor binding	molecular_function	(5,6872,14,268)	7.6743e-06	1.7392e-05	9.1578
GO:0003923	GPI-anchor transamidase activity	molecular_function	(3,6872,5,268)	1.097e-05	2.1293e-05	15.3851
GO:0005230	extracellular ligand-gated ion channel activity	molecular_function	(4,6872,9,268)	9.6314e-06	2.1293e-05	11.3964
GO:0008484	sulfuric ester hydrolase activity	molecular_function	(3,6872,5,268)	1.097e-05	2.1293e-05	15.3851
GO:0022820	potassium ion symporter activity	molecular_function	(3,6872,5,268)	1.097e-05	2.1293e-05	15.3851
N-glycosylated proteins	top 25 terms
Goid	Term	GO Class	(x,M,K,n)	pValue	FDR qValue	Fold Change
GO:0005234	extracellular-glutamate-gated ion channel activity	molecular_function	(12,1301,13,183)	5.79e-12	3.35e-10	6.5624
GO:0004970	ionotropic glutamate receptor activity	molecular_function	(12,1301,12,183)	4.37e-11	1.26e-09	7.1093
GO:0015277	kainate selective glutamate receptor activity	molecular_function	(5,1301,5,183)	5.25e-05	0.000152	7.1093
GO:0004890	GABA-A receptor activity	molecular_function	(6,1301,11,183)	0.000196	0.00037	3.8778
GO:0008239	dipeptidyl-peptidase activity	molecular_function	(3,1301,4,183)	0.000381	0.000415	5.332
GO:0015379	potassium:chloride symporter activity	molecular_function	(3,1301,4,183)	0.000381	0.000415	5.332
GO:0022820	potassium ion symporter activity	molecular_function	(3,1301,4,183)	0.000381	0.000415	5.332
GO:0030165	PDZ domain binding	molecular_function	(10,1301,25,183)	0.000236	0.000415	2.8437
GO:0004971	AMPA glutamate receptor activity	molecular_function	(5,1301,4,183)	0.000381	0.000415	7.1093
GO:0005254	chloride channel activity	molecular_function	(7,1301,15,183)	0.000353	0.000415	3.3177
GO:0005515	protein binding	molecular_function	(43,1301,200,183)	0.000588	0.000576	1.5285
GO:0038191	neuropilin binding	molecular_function	(4,1301,7,183)	0.000865	0.00077	4.0625
GO:0048406	nerve growth factor binding	molecular_function	(2,1301,3,183)	0.00274	0.00122	4.7395
GO:0005001	transmembrane receptor protein tyrosine phosphatase activity	molecular_function	(2,1301,3,183)	0.00274	0.00122	4.7395
GO:0004972	NMDA glutamate receptor activity	molecular_function	(3,1301,3,183)	0.00274	0.00122	7.1093
GO:0005237	inhibitory extracellular ligand-gated ion channel activity	molecular_function	(3,1301,3,183)	0.00274	0.00122	7.1093
GO:0004065	arylsulfatase activity	molecular_function	(2,1301,3,183)	0.00274	0.00122	4.7395
GO:0003923	GPI-anchor transamidase activity	molecular_function	(3,1301,3,183)	0.00274	0.00122	7.1093
GO:0016917	GABA receptor activity	molecular_function	(3,1301,3,183)	0.00274	0.00122	7.1093
GO:0022843	voltage-gated cation channel activity	molecular_function	(3,1301,3,183)	0.00274	0.00122	7.1093
GO:0042165	neurotransmitter binding	molecular_function	(3,1301,3,183)	0.00274	0.00122	7.1093
GO:0005246	calcium channel regulator activity	molecular_function	(5,1301,11,183)	0.00179	0.00122	3.2315
GO:0008236	serine-type peptidase activity	molecular_function	(3,1301,5,183)	0.00169	0.00122	4.2656
GO:0015459	potassium channel regulator activity	molecular_function	(2,1301,3,183)	0.00274	0.00122	4.7395
GO:0005248	voltage-gated sodium channel activity	molecular_function	(5,1301,11,183)	0.00179	0.00122	3.2315

## Sheet: F
Supplementary file 1E. Statistical reporting. Results of the statistical tests used for the indicated figures.
	Figure 1 C
		Kruskal-Walis / Dunn's multiple comparison test
		Number of families	1
		Number of comparisons per family	6
		Alpha	0.05
		Dunn's multiple comparisons test	Mean rank diff,	Significant?	Summary	Adjusted P Value
		ConA
		COS ConA vs. BHK ConA	37.49	No	ns	0.1823
		COS ConA vs. CHO ConA	4.229	No	ns	> 0,9999
		COS ConA vs. neuron ConA	-153.2	Yes	****	< 0,0001
		BHK ConA vs. CHO ConA	-33.26	Yes	*	0.049
		BHK ConA vs. neuron ConA	-190.7	Yes	****	< 0,0001
		CHO ConA vs. neuron ConA	-157.5	Yes	****	< 0,0001
		GNA
		COS GNA vs. BHK GNA	-60.59	Yes	***	0.0007
		COS GNA vs. CHO GNA	-74.07	Yes	****	< 0,0001
		COS GNA vs. neuron GNA	-199.7	Yes	****	< 0,0001
		BHK GNA vs. CHO GNA	-13.48	No	ns	> 0,9999
		BHK GNA vs. neuron GNA	-139.1	Yes	****	< 0,0001
		CHO GNA vs. neuron GNA	-125.6	Yes	****	< 0,0001
		RCA
		COS RCA vs. BHK RCA	159.2	Yes	****	< 0,0001
		COS RCA vs. CHO RCA	203.7	Yes	****	< 0,0001
		COS RCA vs. neuron RCA	113.2	Yes	****	< 0,0001
		BHK RCA vs. CHO RCA	44.55	Yes	**	0.0024
		BHK RCA vs. neuron RCA	-46	Yes	*	0.0343
		CHO RCA vs. neuron RCA	-90.55	Yes	****	< 0,0001
		WGA
		COS WGA vs. BHK WGA	-60.41	Yes	***	0.0001
		COS WGA vs. CHO WGA	-52.16	Yes	***	0.0006
		COS WGA vs. neuron WGA	-93.23	Yes	****	< 0,0001
		BHK WGA vs. CHO WGA	8.252	No	ns	> 0,9999
		BHK WGA vs. neuron WGA	-32.82	No	ns	0.2998
		CHO WGA vs. neuron WGA	-41.07	No	ns	0.0666
	Figure 2C
		Kruskal-Walis / Dunn's multiple comparison test
		Number of families	1
		Number of comparisons per family	4
		Alpha	0.05
		Dunn's multiple comparisons test	Mean rank diff,	Significant?	Summary	Adjusted P Value
		ConA HC div41 vs. ConA COS	8	No	ns	0.2235
		ConA HC div41 vs. ConA BHK	11.25	Yes	*	0.0287
		ConA HC div41 vs. ConA CHO	7.25	No	ns	0.3326
		ConA HC div41 vs. ConA L Cells	13.5	Yes	**	0.005
	Figure 2D
	Linear regression
		Best-fit values
		Slope	-0,003319 ± 0,003179	0,01755 ± 0,003491
		Y-intercept when X=0.0	0,2676 ± 0,01617	0,3128 ± 0,01807
		X-intercept when Y=0.0	80.63	-17.83
		1/slope	-301.3	56.98
		95% Confidence Intervals
		Slope	-0,009856 to 0,003218	0,01036 to 0,02474
		Y-intercept when X=0.0	0,2344 to 0,3009	0,2756 to 0,3501
		X-intercept when Y=0.0	30,01 to +infinity	-33,42 to -11,26
		Goodness of Fit
		R square	0.04023	0.5027
		Sy.x	0.04204	0.04453
		Is slope significantly non-zero?
		F	1.09	25.27
		DFn, DFd	1,000, 26,00	1,000, 25,00
		P value	0.3061	< 0,0001
		Deviation from zero?	Not Significant	Significant
		Data
		Number of X values	28	27
		Maximum number of Y replicates	1	1
		Total number of values	28	27
		Number of missing values	0	1
		Runs test
		Points above line	18	13
		Points below line	10	14
		Number of runs?? [X not in order].	7	13
		Equation	Y = -0,003319*X + 0,2676	Y = 0,01755*X + 0,3128
	Pearson r
		r	-0.2006	0.709
		95% confidence interval	-0,5338 to 0,1866	0,4503 to 0,8579
		R square	0.04023	0.5027
		P value
		P (two-tailed)	0.3061	< 0,0001
		P value summary	ns	****
		Significant? (alpha = 0.05)	No	Yes
		Number of XY Pairs	28	27
	Figure 5D
		Kruskal-Walis / Dunn's multiple comparison test
		Dunn's multiple comparisons test	Mean rank diff,	Significant?	Summary	Adjusted P Value
	dend. length	Ct vs. Tm	204.3	Yes	****	< 0,0001
		Ct vs. Kf	8.104	No	ns	> 0,9999
		Ct vs. DMJ	26.35	No	ns	> 0,9999
		Ct vs. Sw	5.334	No	ns	> 0,9999
		Tm vs. Kf	-196.2	Yes	****	< 0,0001
		Tm vs. DMJ	-177.9	Yes	****	< 0,0001
		Tm vs. Sw	-198.9	Yes	****	< 0,0001
		Kf vs. DMJ	18.25	No	ns	> 0,9999
		Kf vs. Sw	-2.771	No	ns	> 0,9999
		DMJ vs. Sw	-21.02	No	ns	> 0,9999
	dend. tip #	Ct vs. Tm	206.1	Yes	****	< 0,0001
		Ct vs. Kf	-5.322	No	ns	> 0,9999
		Ct vs. DMJ	33.03	No	ns	> 0,9999
		Ct vs. Sw	9.539	No	ns	> 0,9999
		Tm vs. Kf	-211.4	Yes	****	< 0,0001
		Tm vs. DMJ	-173.1	Yes	****	< 0,0001
		Tm vs. Sw	-196.6	Yes	****	< 0,0001
		Kf vs. DMJ	38.35	No	ns	> 0,9999
		Kf vs. Sw	14.86	No	ns	> 0,9999
		DMJ vs. Sw	-23.49	No	ns	> 0,9999
	Figure 6C
	series 1	Number of families	1
		Number of comparisons per family	2
		Alpha	0.05
		Dunn's multiple comparisons test	Mean rank diff,	Significant?	Summary
		ctr COS vs. BFA COS	11.4	Yes	*
		ctr HCN vs. BFA hcn	-2.429	No	ns
		Test details	Mean rank 1	Mean rank 2	Mean rank diff,	n1	n2
		ctr COS vs. BFA COS	14.4	3	11.4	5	5
		ctr HCN vs. BFA hcn	14	16.43	-2.429	7	7
	series 2	Number of families	1
		Number of comparisons per family	6
		Alpha	0.05
		Dunn's multiple comparisons test	Mean rank diff,	Significant?	Summary
		ctr COS vs. BFA COS	11.4	No	ns
		ctr COS vs. ctr HCN	0.4	No	ns
		ctr COS vs. BFA hcn	-2.029	No	ns
		BFA COS vs. ctr HCN	-11	Yes	*
		BFA COS vs. BFA hcn	-13.43	Yes	**
		ctr HCN vs. BFA hcn	-2.429	No	ns
		Test details	Mean rank 1	Mean rank 2	Mean rank diff,	n1	n2
		ctr COS vs. BFA COS	14.4	3	11.4	5	5
		ctr COS vs. ctr HCN	14.4	14	0.4	5	7
		ctr COS vs. BFA hcn	14.4	16.43	-2.029	5	7
		BFA COS vs. ctr HCN	3	14	-11	5	7
		BFA COS vs. BFA hcn	3	16.43	-13.43	5	7
		ctr HCN vs. BFA hcn	14	16.43	-2.429	7	7
	Figure 6E
		Column statistics	ctr GluA2	BFA GluA2	ctr cacng2	BFA cacng2	ctr GluN1	ctr GluN1
		Number of values	10	11	10	11	10	11
		Minimum	0.9011	0.4973	0.9273	0.4624	0.8343	0.6516
		25% Percentile	0.9432	0.6231	0.9631	0.5534	0.9719	0.8009
		Median	1.017	0.9141	0.9903	0.7304	1.002	0.9815
		75% Percentile	1.054	1.043	1.049	1.11	1.046	1.173
		Maximum	1.062	1.121	1.095	1.196	1.137	1.364
		Mean	1	0.8594	1	0.8011	1	0.9487
		Std. Deviation	0.06059	0.2269	0.05257	0.2737	0.08588	0.225
		Std. Error of Mean	0.01916	0.06842	0.01662	0.08252	0.02716	0.06784
		Lower 95% CI of mean	0.9567	0.7069	0.9624	0.6173	0.9386	0.7976
		Upper 95% CI of mean	1.043	1.012	1.038	0.985	1.061	1.1
		Shapiro-Wilk normality test
		W	0.8487	0.9033	0.9582	0.9049	0.913	0.9457
		P value	0.0561	0.203	0.7649	0.2121	0.3019	0.5902
		Passed normality test (alpha=0.05)?	Yes	Yes	Yes	Yes	Yes	Yes
		P value summary	ns	ns	ns	ns	ns	ns
		One-way ANOVA
		Number of families	1
		Number of comparisons per family	3
		Alpha	0.05
		Sidak's multiple comparisons test	Mean Diff,	95% CI of diff,	Significant?	Summary
		ctr GluA2 vs. BFA GluA2	0.1406	-0,05532 to 0,3366	No	ns
		ctr cacng8 vs. BFA cacng8	0.1989	0,002903 to 0,3948	Yes	*
		ctr GluN1 vs. ctr GluN1	0.0513	-0,1446 to 0,2473	No	ns
		Test details	Mean 1	Mean 2	Mean Diff,	SE of diff,	n1	n2	t	DF
		ctr GluA2 vs. BFA GluA2	1	0.8594	0.1406	0.07966	10	11	1.765	57
		ctr cacng8 vs. BFA cacng8	1	0.8011	0.1989	0.07966	10	11	2.496	57
		ctr GluN1 vs. ctr GluN1	1	0.9487	0.0513	0.07966	10	11	0.644	57
	Figure 7B
		Table Analyzed	amplitude (pA)		frequency (Hz)		input resistance (mO)
		Column B	kf		kf		kf
		vs.	vs,		vs,		vs,
		Column A	ctr		CTR		ctr
		Mann Whitney test
		P value	0.1609		0.7203		0.262
		Exact or approximate P value?	Exact		Exact		Exact
		P value summary	ns		ns		ns
		Significantly different? (P < 0.05)	No		No		No
		One- or two-tailed P value?	Two-tailed		Two-tailed		Two-tailed
		Sum of ranks in column A,B	75,00 , 78,00		86,00 , 67,00		102,0 , 51,00
		Mann-Whitney U	20		31		23
		Difference between medians
		Median of column A	7.195		1.433		357.6
		Median of column B	9.06		2.23		200
		Difference: Actual	1.865		0.7967		-157.6
		Difference: Hodges-Lehmann	1.475		0.3267		-105.5
		95.69% CI of difference	-2,470 to 5,070		-3,113 to 3,183		-232,3 to 91,94
		Exact or approximate CI?	Exact		Exact		Exact
	Figure 7E
		Table Analyzed	Data 1
		Column B	after
		vs.	vs,
		Column A	before
		Mann Whitney test
		P value	0.0079
		Exact or approximate P value?	Exact
		P value summary	**
		Significantly different? (P < 0.05)	Yes
		One- or two-tailed P value?	Two-tailed
		Sum of ranks in column A,B	40,00 , 15,00
		Mann-Whitney U	0
		Difference between medians
		Median of column A	5.126
		Median of column B	1.138
		Difference: Actual	-3.989
		Difference: Hodges-Lehmann	-4
		96.83% CI of difference	-5,355 to -1,361
		Exact or approximate CI?	Exact
	Figure 7H
		Table Analyzed	time to peak (sec)		plateau decay
		Column B	Kf		Kf
		vs.	vs,		vs,
		Column A	Ct		Ct
		Mann Whitney test
		P value	0.0072		0.0929
		Exact or approximate P value?	Exact		Exact
		P value summary	**		ns
		Significantly different? (P < 0.05)	Yes		No
		One- or two-tailed P value?	Two-tailed		Two-tailed
		Sum of ranks in column A,B	1126 , 704,5		567,0 , 423,0
		Mann-Whitney U	269.5		170
		Difference between medians
		Median of column A	2343		0.6304
		Median of column B	1504		0.5243
		Difference: Actual	-839		-0.1061
		Difference: Hodges-Lehmann	-835		-0.09255
		95.16% CI of difference	-1593 to -216,0		-0,2370 to 0,01290
		Exact or approximate CI?	Exact		Exact
	Figure 8C
		Column statistics	mature 0	immature 0	mature 4	immature 4	mature 8	immature 8	mature 12	immature 12
		Number of values	8	8	8	8	6	6	8	8
		Minimum	0.942	0.8941	0.6166	0.4647	0.7137	0.4283	0.4669	0.3539
		25% Percentile	0.9557	0.9406	0.8359	0.6205	0.7146	0.5009	0.5057	0.3899
		Median	1	1	0.9615	0.7274	0.9494	0.5485	0.7099	0.48
		75% Percentile	1.044	1.059	1.107	0.8075	1.048	0.5924	1.018	0.5756
		Maximum	1.058	1.106	1.129	0.85	1.056	0.5929	1.191	0.7519
		Mean	1	1	0.9434	0.7024	0.9048	0.5392	0.7652	0.5009
		Std. Deviation	0.04372	0.06946	0.1724	0.1265	0.1544	0.06235	0.2751	0.1277
		Std. Error of Mean	0.01546	0.02456	0.06094	0.04474	0.06303	0.02546	0.09726	0.04515
		Lower 95% CI of mean	0.9635	0.9419	0.7993	0.5966	0.7428	0.4738	0.5352	0.3942
		Upper 95% CI of mean	1.037	1.058	1.087	0.8082	1.067	0.6047	0.9952	0.6077
		KS normality test
		KS distance	0.1328	0.125	0.1413	0.1408	0.2663	0.2436	0.2123	0.1855
		P value	0.2	0.2	0.2	0.2	0.2	0.2	0.2	0.2
		Passed normality test (alpha=0.05)?	Yes	Yes	Yes	Yes	Yes	Yes	Yes	Yes
		P value summary	ns	ns	ns	ns	ns	ns	ns	ns
		Sum	8	8	7.547	5.619	5.429	3.235	6.122	4.007
		Column statistics
		Number of families	1
		Number of comparisons per family	28
		Alpha	0.05
		Tukey's multiple comparisons test	Mean Diff,	95% CI of diff,	Significant?	Summary
		mature 0 vs. immature 0	1.043e-07	-0,2347 to 0,2347	No	ns
		mature 0 vs. mature 4	0.05664	-0,1781 to 0,2914	No	ns
		mature 0 vs. immature 4	0.2976	0,06283 to 0,5323	Yes	**
		mature 0 vs. mature 8	0.09522	-0,1583 to 0,3488	No	ns
		mature 0 vs. immature 8	0.4608	0,2072 to 0,7143	Yes	****
		mature 0 vs. mature 12	0.2348	4,647e-005 to 0,4695	Yes	*
		mature 0 vs. immature 12	0.4991	0,2643 to 0,7338	Yes	****
		immature 0 vs. mature 4	0.05664	-0,1781 to 0,2914	No	ns
		immature 0 vs. immature 4	0.2976	0,06283 to 0,5323	Yes	**
		immature 0 vs. mature 8	0.09522	-0,1583 to 0,3488	No	ns
		immature 0 vs. immature 8	0.4608	0,2072 to 0,7143	Yes	****
		immature 0 vs. mature 12	0.2348	4,637e-005 to 0,4695	Yes	*
		immature 0 vs. immature 12	0.4991	0,2643 to 0,7338	Yes	****
		mature 4 vs. immature 4	0.2409	0,006186 to 0,4757	Yes	*
		mature 4 vs. mature 8	0.03858	-0,2150 to 0,2921	No	ns
		mature 4 vs. immature 8	0.4041	0,1506 to 0,6577	Yes	***
		mature 4 vs. mature 12	0.1781	-0,05660 to 0,4129	No	ns
		mature 4 vs. immature 12	0.4424	0,2077 to 0,6772	Yes	****
		immature 4 vs. mature 8	-0.2023	-0,4559 to 0,05120	No	ns
		immature 4 vs. immature 8	0.1632	-0,09036 to 0,4167	No	ns
		immature 4 vs. mature 12	-0.06278	-0,2975 to 0,1720	No	ns
		immature 4 vs. immature 12	0.2015	-0,03324 to 0,4362	No	ns
		mature 8 vs. immature 8	0.3655	0,09448 to 0,6366	Yes	**
		mature 8 vs. mature 12	0.1396	-0,1140 to 0,3931	No	ns
		mature 8 vs. immature 12	0.4039	0,1503 to 0,6574	Yes	***
		immature 8 vs. mature 12	-0.226	-0,4795 to 0,02758	No	ns
		immature 8 vs. immature 12	0.03831	-0,2152 to 0,2919	No	ns
		mature 12 vs. immature 12	0.2643	0,02954 to 0,4990	Yes	*
	Figure 8D
		Mann-Whitney test
		Table Analyzed	GluA2 total expression
		Column B	Cnqx ap5
		vs.	vs,
		Column A	BIC
		Mann Whitney test
		P value	0.6894
		Exact or approximate P value?	Exact
		P value summary	ns
		Significantly different? (P < 0.05)	No
		One- or two-tailed P value?	Two-tailed
		Sum of ranks in column A,B	56,00 , 49,00
		Mann-Whitney U	21
		Difference between medians
		Median of column A	0.9027
		Median of column B	0.9573
		Difference: Actual	0.05467
		Difference: Hodges-Lehmann	-0.06219
		Table Analyzed	surf. GluA2 expression
		Column B	cnqx apv
		vs.	vs,
		Column A	bic
		Mann Whitney test
		P value	0.007
		Exact or approximate P value?	Exact
		P value summary	**
		Significantly different? (P < 0.05)	Yes
		One- or two-tailed P value?	Two-tailed
		Sum of ranks in column A,B	32,00 , 73,00
		Mann-Whitney U	4
		Difference between medians
		Median of column A	0.7362
		Median of column B	1.106
		Difference: Actual	0.3697
		Difference: Hodges-Lehmann	0.3697
	Figure 8E
		Table Analyzed	ConA total
		Column B	cnqx apv
		vs.	vs,
		Column A	bic
		Mann Whitney test
		P value	0.3759
		Exact or approximate P value?	Exact
		P value summary	ns
		Significantly different? (P < 0.05)	No
		One- or two-tailed P value?	Two-tailed
		Sum of ranks in column A,B	45,00 , 60,00
		Mann-Whitney U	17
		Difference between medians
		Median of column A	0.931
		Median of column B	1.173
		Difference: Actual	0.2422
		Difference: Hodges-Lehmann	0.2176
		Table Analyzed	sConA expression
		Column B	cnqx ap5
		vs.	vs,
		Column A	bic
		Mann Whitney test
		P value	0.0262
		Exact or approximate P value?	Exact
		P value summary	*
		Significantly different? (P < 0.05)	Yes
		One- or two-tailed P value?	Two-tailed
		Sum of ranks in column A,B	35,00 , 70,00
		Mann-Whitney U	7
		Difference between medians
		Median of column A	0.9948
		Median of column B	1.308
		Difference: Actual	0.3131
		Difference: Hodges-Lehmann	0.3302
	Figure 1 - Supplement 2 B
	series 1	Number of families	1
		Number of comparisons per family	5
		Alpha	0.05
		Dunn's multiple comparisons test	Mean rank diff,	Significant?	Summary
		ConA CT vs. ConA Kf	-215.6	Yes	****
		GNA CT vs. GNA Kf	-58.96	No	ns
		RCA CT vs. RCA Kf	140	Yes	****
		WGA CT vs. WGA Kf	151.7	Yes	****
		GNA Kf vs. RCA Kf	207.8	Yes	****
		Test details	Mean rank 1	Mean rank 2	Mean rank diff,	n1	n2
		ConA CT vs. ConA Kf	281.2	496.7	-215.6	75	65
		GNA CT vs. GNA Kf	275.3	334.3	-58.96	64	74
		RCA CT vs. RCA Kf	266.5	126.5	140	81	79
		WGA CT vs. WGA Kf	288	136.3	151.7	59	53
		GNA Kf vs. RCA Kf	334.3	126.5	207.8	74	79
	Series 2
		Number of families	1
		Number of comparisons per family	28
		Alpha	0.05
		Dunn's multiple comparisons test	Mean rank diff,	Significant?	Summary
		ConA CT vs. ConA Kf	-215.6	Yes	****
		ConA CT vs. GNA CT	5.832	No	ns
		ConA CT vs. GNA Kf	-53.12	No	ns
		ConA CT vs. RCA CT	14.7	No	ns
		ConA CT vs. RCA Kf	154.7	Yes	****
		ConA CT vs. WGA CT	-6.84	No	ns
		ConA CT vs. WGA Kf	144.8	Yes	****
		ConA Kf vs. GNA CT	221.4	Yes	****
		ConA Kf vs. GNA Kf	162.4	Yes	****
		ConA Kf vs. RCA CT	230.3	Yes	****
		ConA Kf vs. RCA Kf	370.2	Yes	****
		ConA Kf vs. WGA CT	208.7	Yes	****
		ConA Kf vs. WGA Kf	360.4	Yes	****
		GNA CT vs. GNA Kf	-58.96	No	ns
		GNA CT vs. RCA CT	8.871	No	ns
		GNA CT vs. RCA Kf	148.8	Yes	****
		GNA CT vs. WGA CT	-12.67	No	ns
		GNA CT vs. WGA Kf	139	Yes	****
		GNA Kf vs. RCA CT	67.83	No	ns
		GNA Kf vs. RCA Kf	207.8	Yes	****
		GNA Kf vs. WGA CT	46.28	No	ns
		GNA Kf vs. WGA Kf	198	Yes	****
		RCA CT vs. RCA Kf	140	Yes	****
		RCA CT vs. WGA CT	-21.54	No	ns
		RCA CT vs. WGA Kf	130.1	Yes	***
		RCA Kf vs. WGA CT	-161.5	Yes	****
		RCA Kf vs. WGA Kf	-9.827	No	ns
		WGA CT vs. WGA Kf	151.7	Yes	****
		6 values larger than mean + 2 SD were excluded, 2 for G Ct in experiment 1, 2 for WGA Ct and 2 for WGA Kf in experiment 2
	Figure 1 - Supplement 4 B
		Kruskal-Walis / Dunn's multiple comparison test
		Number of families	1
		Number of comparisons per family	2
		Alpha	0.05
		Dunn's multiple comparisons test	Mean rank diff,	Significant?	Summary	Adjusted P Value
		ConA
		ConA ctr vs. ConA Endo H	33.77	Yes	****	< 0,0001
		ConA ctr vs. ConA PNGAse	35.06	Yes	****	< 0,0001
		ConA Endo H vs. ConA PNGAse	1.29	No	ns	> 0,9999
		RCA
		RCA ctr vs. RCA EndoH	9.724	No	ns	0.3023
		RCA ctr vs. RCA PNGAse	40.53	Yes	****	< 0,0001
		RCA EndoH vs. RCA PNGAse	30.81	Yes	****	< 0,0001
		WGA
		WGA ctr vs. WGA EndoH	1.155	No	ns	> 0,9999
		WGA ctr vs. WGA PNGase	31.06	Yes	****	< 0,0001
		WGA EndoH vs. WGA PNGase	29.9	Yes	****	< 0,0001
	Figure 5 - Supplement 2B
		Number of families	1
		Number of comparisons per family	105
		Alpha	0.05
		Dunn's multiple comparisons test	Mean rank diff,	Significant?	Summary	Adjusted P Value
		ConA Ct vs. ConA Tm	70.27	Yes	*	0.0355
		ConA Ct vs. ConA Kf	-50.24	No	ns	0.8977
		ConA Ct vs. ConA Dj	-40.42	No	ns	> 0,9999
		ConA Ct vs. ConA Sw	-37.25	No	ns	> 0,9999
		ConA Ct vs. RCA Ct	0.08333	No	ns	> 0,9999
		ConA Ct vs. RCA Tm	70.57	Yes	*	0.0335
		ConA Ct vs. RCA Kf	61.21	No	ns	0.1427
		ConA Ct vs. RCA Dj	55.25	No	ns	0.3268
		ConA Ct vs. RCA SW	41.5	No	ns	> 0,9999
		ConA Ct vs. WGA Ct	-0.1333	No	ns	> 0,9999
		ConA Ct vs. WGA Tm	59.29	No	ns	0.477
		ConA Ct vs. WGA Kf	56	No	ns	0.5807
		ConA Ct vs. WGA Dj	34.33	No	ns	> 0,9999
		ConA Ct vs. WGA Sw	-21.83	No	ns	> 0,9999
		ConA Tm vs. ConA Kf	-120.5	Yes	****	< 0,0001
		ConA Tm vs. ConA Dj	-110.7	Yes	****	< 0,0001
		ConA Tm vs. ConA Sw	-107.5	Yes	****	< 0,0001
		ConA Tm vs. RCA Ct	-70.18	Yes	*	0.0361
		ConA Tm vs. RCA Tm	0.3	No	ns	> 0,9999
		ConA Tm vs. RCA Kf	-9.055	No	ns	> 0,9999
		ConA Tm vs. RCA Dj	-15.02	No	ns	> 0,9999
		ConA Tm vs. RCA SW	-28.77	No	ns	> 0,9999
		ConA Tm vs. WGA Ct	-70.4	No	ns	0.0615
		ConA Tm vs. WGA Tm	-10.98	No	ns	> 0,9999
		ConA Tm vs. WGA Kf	-14.27	No	ns	> 0,9999
		ConA Tm vs. WGA Dj	-35.93	No	ns	> 0,9999
		ConA Tm vs. WGA Sw	-92.1	Yes	**	0.0024
		ConA Kf vs. ConA Dj	9.826	No	ns	> 0,9999
		ConA Kf vs. ConA Sw	12.99	No	ns	> 0,9999
		ConA Kf vs. RCA Ct	50.33	No	ns	0.8862
		ConA Kf vs. RCA Tm	120.8	Yes	****	< 0,0001
		ConA Kf vs. RCA Kf	111.5	Yes	****	< 0,0001
		ConA Kf vs. RCA Dj	105.5	Yes	****	< 0,0001
		ConA Kf vs. RCA SW	91.74	Yes	***	0.0002
		ConA Kf vs. WGA Ct	50.11	No	ns	> 0,9999
		ConA Kf vs. WGA Tm	109.5	Yes	****	< 0,0001
		ConA Kf vs. WGA Kf	106.2	Yes	****	< 0,0001
		ConA Kf vs. WGA Dj	84.58	Yes	**	0.0042
		ConA Kf vs. WGA Sw	28.41	No	ns	> 0,9999
		ConA Dj vs. ConA Sw	3.167	No	ns	> 0,9999
		ConA Dj vs. RCA Ct	40.5	No	ns	> 0,9999
		ConA Dj vs. RCA Tm	111	Yes	****	< 0,0001
		ConA Dj vs. RCA Kf	101.6	Yes	****	< 0,0001
		ConA Dj vs. RCA Dj	95.67	Yes	****	< 0,0001
		ConA Dj vs. RCA SW	81.92	Yes	**	0.0012
		ConA Dj vs. WGA Ct	40.28	No	ns	> 0,9999
		ConA Dj vs. WGA Tm	99.71	Yes	***	0.0002
		ConA Dj vs. WGA Kf	96.42	Yes	***	0.0002
		ConA Dj vs. WGA Dj	74.75	Yes	*	0.0224
		ConA Dj vs. WGA Sw	18.58	No	ns	> 0,9999
		ConA Sw vs. RCA Ct	37.33	No	ns	> 0,9999
		ConA Sw vs. RCA Tm	107.8	Yes	****	< 0,0001
		ConA Sw vs. RCA Kf	98.46	Yes	****	< 0,0001
		ConA Sw vs. RCA Dj	92.5	Yes	****	< 0,0001
		ConA Sw vs. RCA SW	78.75	Yes	**	0.0027
		ConA Sw vs. WGA Ct	37.12	No	ns	> 0,9999
		ConA Sw vs. WGA Tm	96.54	Yes	***	0.0004
		ConA Sw vs. WGA Kf	93.25	Yes	***	0.0004
		ConA Sw vs. WGA Dj	71.58	Yes	*	0.0411
		ConA Sw vs. WGA Sw	15.42	No	ns	> 0,9999
		RCA Ct vs. RCA Tm	70.48	Yes	*	0.034
		RCA Ct vs. RCA Kf	61.13	No	ns	0.1449
		RCA Ct vs. RCA Dj	55.17	No	ns	0.3316
		RCA Ct vs. RCA SW	41.42	No	ns	> 0,9999
		RCA Ct vs. WGA Ct	-0.2167	No	ns	> 0,9999
		RCA Ct vs. WGA Tm	59.21	No	ns	0.483
		RCA Ct vs. WGA Kf	55.92	No	ns	0.5881
		RCA Ct vs. WGA Dj	34.25	No	ns	> 0,9999
		RCA Ct vs. WGA Sw	-21.92	No	ns	> 0,9999
		RCA Tm vs. RCA Kf	-9.355	No	ns	> 0,9999
		RCA Tm vs. RCA Dj	-15.32	No	ns	> 0,9999
		RCA Tm vs. RCA SW	-29.07	No	ns	> 0,9999
		RCA Tm vs. WGA Ct	-70.7	No	ns	0.0582
		RCA Tm vs. WGA Tm	-11.28	No	ns	> 0,9999
		RCA Tm vs. WGA Kf	-14.57	No	ns	> 0,9999
		RCA Tm vs. WGA Dj	-36.23	No	ns	> 0,9999
		RCA Tm vs. WGA Sw	-92.4	Yes	**	0.0022
		RCA Kf vs. RCA Dj	-5.962	No	ns	> 0,9999
		RCA Kf vs. RCA SW	-19.71	No	ns	> 0,9999
		RCA Kf vs. WGA Ct	-61.35	No	ns	0.2271
		RCA Kf vs. WGA Tm	-1.92	No	ns	> 0,9999
		RCA Kf vs. WGA Kf	-5.212	No	ns	> 0,9999
		RCA Kf vs. WGA Dj	-26.88	No	ns	> 0,9999
		RCA Kf vs. WGA Sw	-83.05	Yes	**	0.01
		RCA Dj vs. RCA SW	-13.75	No	ns	> 0,9999
		RCA Dj vs. WGA Ct	-55.38	No	ns	0.4954
		RCA Dj vs. WGA Tm	4.042	No	ns	> 0,9999
		RCA Dj vs. WGA Kf	0.75	No	ns	> 0,9999
		RCA Dj vs. WGA Dj	-20.92	No	ns	> 0,9999
		RCA Dj vs. WGA Sw	-77.08	Yes	*	0.0237
		RCA SW vs. WGA Ct	-41.63	No	ns	> 0,9999
		RCA SW vs. WGA Tm	17.79	No	ns	> 0,9999
		RCA SW vs. WGA Kf	14.5	No	ns	> 0,9999
		RCA SW vs. WGA Dj	-7.167	No	ns	> 0,9999
		RCA SW vs. WGA Sw	-63.33	No	ns	0.2559
		WGA Ct vs. WGA Tm	59.43	No	ns	0.6512
		WGA Ct vs. WGA Kf	56.13	No	ns	0.7988
		WGA Ct vs. WGA Dj	34.47	No	ns	> 0,9999
		WGA Ct vs. WGA Sw	-21.7	No	ns	> 0,9999
		WGA Tm vs. WGA Kf	-3.292	No	ns	> 0,9999
		WGA Tm vs. WGA Dj	-24.96	No	ns	> 0,9999
		WGA Tm vs. WGA Sw	-81.13	Yes	*	0.0414
		WGA Kf vs. WGA Dj	-21.67	No	ns	> 0,9999
		WGA Kf vs. WGA Sw	-77.83	Yes	*	0.0491
		WGA Dj vs. WGA Sw	-56.17	No	ns	> 0,9999
		Test details	Mean rank 1	Mean rank 2	Mean rank diff,	n1	n2
		ConA Ct vs. ConA Tm	97.67	27.4	70.27	12	10
		ConA Ct vs. ConA Kf	97.67	147.9	-50.24	12	11
		ConA Ct vs. ConA Dj	97.67	138.1	-40.42	12	12
		ConA Ct vs. ConA Sw	97.67	134.9	-37.25	12	12
		ConA Ct vs. RCA Ct	97.67	97.58	0.08333	12	12
		ConA Ct vs. RCA Tm	97.67	27.1	70.57	12	10
		ConA Ct vs. RCA Kf	97.67	36.45	61.21	12	11
		ConA Ct vs. RCA Dj	97.67	42.42	55.25	12	12
		ConA Ct vs. RCA SW	97.67	56.17	41.5	12	12
		ConA Ct vs. WGA Ct	97.67	97.8	-0.1333	12	10
		ConA Ct vs. WGA Tm	97.67	38.38	59.29	12	8
		ConA Ct vs. WGA Kf	97.67	41.67	56	12	9
		ConA Ct vs. WGA Dj	97.67	63.33	34.33	12	9
		ConA Ct vs. WGA Sw	97.67	119.5	-21.83	12	8
		ConA Tm vs. ConA Kf	27.4	147.9	-120.5	10	11
		ConA Tm vs. ConA Dj	27.4	138.1	-110.7	10	12
		ConA Tm vs. ConA Sw	27.4	134.9	-107.5	10	12
		ConA Tm vs. RCA Ct	27.4	97.58	-70.18	10	12
		ConA Tm vs. RCA Tm	27.4	27.1	0.3	10	10
		ConA Tm vs. RCA Kf	27.4	36.45	-9.055	10	11
		ConA Tm vs. RCA Dj	27.4	42.42	-15.02	10	12
		ConA Tm vs. RCA SW	27.4	56.17	-28.77	10	12
		ConA Tm vs. WGA Ct	27.4	97.8	-70.4	10	10
		ConA Tm vs. WGA Tm	27.4	38.38	-10.98	10	8
		ConA Tm vs. WGA Kf	27.4	41.67	-14.27	10	9
		ConA Tm vs. WGA Dj	27.4	63.33	-35.93	10	9
		ConA Tm vs. WGA Sw	27.4	119.5	-92.1	10	8
		ConA Kf vs. ConA Dj	147.9	138.1	9.826	11	12
		ConA Kf vs. ConA Sw	147.9	134.9	12.99	11	12
		ConA Kf vs. RCA Ct	147.9	97.58	50.33	11	12
		ConA Kf vs. RCA Tm	147.9	27.1	120.8	11	10
		ConA Kf vs. RCA Kf	147.9	36.45	111.5	11	11
		ConA Kf vs. RCA Dj	147.9	42.42	105.5	11	12
		ConA Kf vs. RCA SW	147.9	56.17	91.74	11	12
		ConA Kf vs. WGA Ct	147.9	97.8	50.11	11	10
		ConA Kf vs. WGA Tm	147.9	38.38	109.5	11	8
		ConA Kf vs. WGA Kf	147.9	41.67	106.2	11	9
		ConA Kf vs. WGA Dj	147.9	63.33	84.58	11	9
		ConA Kf vs. WGA Sw	147.9	119.5	28.41	11	8
		ConA Dj vs. ConA Sw	138.1	134.9	3.167	12	12
		ConA Dj vs. RCA Ct	138.1	97.58	40.5	12	12
		ConA Dj vs. RCA Tm	138.1	27.1	111	12	10
		ConA Dj vs. RCA Kf	138.1	36.45	101.6	12	11
		ConA Dj vs. RCA Dj	138.1	42.42	95.67	12	12
		ConA Dj vs. RCA SW	138.1	56.17	81.92	12	12
		ConA Dj vs. WGA Ct	138.1	97.8	40.28	12	10
		ConA Dj vs. WGA Tm	138.1	38.38	99.71	12	8
		ConA Dj vs. WGA Kf	138.1	41.67	96.42	12	9
		ConA Dj vs. WGA Dj	138.1	63.33	74.75	12	9
		ConA Dj vs. WGA Sw	138.1	119.5	18.58	12	8
		ConA Sw vs. RCA Ct	134.9	97.58	37.33	12	12
		ConA Sw vs. RCA Tm	134.9	27.1	107.8	12	10
		ConA Sw vs. RCA Kf	134.9	36.45	98.46	12	11
		ConA Sw vs. RCA Dj	134.9	42.42	92.5	12	12
		ConA Sw vs. RCA SW	134.9	56.17	78.75	12	12
		ConA Sw vs. WGA Ct	134.9	97.8	37.12	12	10
		ConA Sw vs. WGA Tm	134.9	38.38	96.54	12	8
		ConA Sw vs. WGA Kf	134.9	41.67	93.25	12	9
		ConA Sw vs. WGA Dj	134.9	63.33	71.58	12	9
		ConA Sw vs. WGA Sw	134.9	119.5	15.42	12	8
		RCA Ct vs. RCA Tm	97.58	27.1	70.48	12	10
		RCA Ct vs. RCA Kf	97.58	36.45	61.13	12	11
		RCA Ct vs. RCA Dj	97.58	42.42	55.17	12	12
		RCA Ct vs. RCA SW	97.58	56.17	41.42	12	12
		RCA Ct vs. WGA Ct	97.58	97.8	-0.2167	12	10
		RCA Ct vs. WGA Tm	97.58	38.38	59.21	12	8
		RCA Ct vs. WGA Kf	97.58	41.67	55.92	12	9
		RCA Ct vs. WGA Dj	97.58	63.33	34.25	12	9
		RCA Ct vs. WGA Sw	97.58	119.5	-21.92	12	8
		RCA Tm vs. RCA Kf	27.1	36.45	-9.355	10	11
		RCA Tm vs. RCA Dj	27.1	42.42	-15.32	10	12
		RCA Tm vs. RCA SW	27.1	56.17	-29.07	10	12
		RCA Tm vs. WGA Ct	27.1	97.8	-70.7	10	10
		RCA Tm vs. WGA Tm	27.1	38.38	-11.28	10	8
		RCA Tm vs. WGA Kf	27.1	41.67	-14.57	10	9
		RCA Tm vs. WGA Dj	27.1	63.33	-36.23	10	9
		RCA Tm vs. WGA Sw	27.1	119.5	-92.4	10	8
		RCA Kf vs. RCA Dj	36.45	42.42	-5.962	11	12
		RCA Kf vs. RCA SW	36.45	56.17	-19.71	11	12
		RCA Kf vs. WGA Ct	36.45	97.8	-61.35	11	10
		RCA Kf vs. WGA Tm	36.45	38.38	-1.92	11	8
		RCA Kf vs. WGA Kf	36.45	41.67	-5.212	11	9
		RCA Kf vs. WGA Dj	36.45	63.33	-26.88	11	9
		RCA Kf vs. WGA Sw	36.45	119.5	-83.05	11	8
		RCA Dj vs. RCA SW	42.42	56.17	-13.75	12	12
		RCA Dj vs. WGA Ct	42.42	97.8	-55.38	12	10
		RCA Dj vs. WGA Tm	42.42	38.38	4.042	12	8
		RCA Dj vs. WGA Kf	42.42	41.67	0.75	12	9
		RCA Dj vs. WGA Dj	42.42	63.33	-20.92	12	9
		RCA Dj vs. WGA Sw	42.42	119.5	-77.08	12	8
		RCA SW vs. WGA Ct	56.17	97.8	-41.63	12	10
		RCA SW vs. WGA Tm	56.17	38.38	17.79	12	8
		RCA SW vs. WGA Kf	56.17	41.67	14.5	12	9
		RCA SW vs. WGA Dj	56.17	63.33	-7.167	12	9
		RCA SW vs. WGA Sw	56.17	119.5	-63.33	12	8
		WGA Ct vs. WGA Tm	97.8	38.38	59.43	10	8
		WGA Ct vs. WGA Kf	97.8	41.67	56.13	10	9
		WGA Ct vs. WGA Dj	97.8	63.33	34.47	10	9
		WGA Ct vs. WGA Sw	97.8	119.5	-21.7	10	8
		WGA Tm vs. WGA Kf	38.38	41.67	-3.292	8	9
		WGA Tm vs. WGA Dj	38.38	63.33	-24.96	8	9
		WGA Tm vs. WGA Sw	38.38	119.5	-81.13	8	8
		WGA Kf vs. WGA Dj	41.67	63.33	-21.67	9	9
		WGA Kf vs. WGA Sw	41.67	119.5	-77.83	9	8
		WGA Dj vs. WGA Sw	63.33	119.5	-56.17	9	8
	Figure 7 - Supplement 1 B
		Kruskal-Walis / Dunn's multiple comparison test
		Number of families	1
		Number of comparisons per family	4
		Alpha	0.05
		Dunn's multiple comparisons test	Mean rank diff,	Significant?	Summary	Adjusted P Value
		GluA2 - CT vs. GluA2 - TM	13.63	Yes	*	0.0109
		GluA2 - CT vs. GluA2 - KF	-4.475	No	ns	> 0,9999
		GluA2 - CT vs. GluA2-DJM	-6.125	No	ns	> 0,9999
		GluA2 - CT vs. GluA2-SW	0.625	No	ns	> 0,9999
